# Supplementary material for: Carbon fluxes from land 2000–2020: bringing clarity on countries’ reporting
Source: Copernicus journal article supplement (doi:10.5194/essd-2022-104), 2022-04-04
Supplement: Supplementary file 1 [file essd-2022-104-supplement.pdf]

# Supplementary information

## Carbon fluxes from land 2000-2020: bringing clarity on countries' reporting

Giacomo Grassi<sup>1\*</sup>, Giulia Conchedda<sup>2</sup>, Sandro Federici<sup>3</sup>, Raul Abad Viñas<sup>1</sup>, Anu Korosuo<sup>1</sup>, Joana Melo<sup>4</sup>, Simone Rossi<sup>5</sup>, Marieke Sandker<sup>6</sup>, Zoltan Somogyi<sup>7</sup>, Francesco N. Tubiello<sup>2</sup>

1 Joint Research Centre (JRC), European Commission, Ispra, 21027, Italy.

2 Statistics Division, FAO, Rome, 00153, Italy

3 Institute for Global Environmental Strategies, IGES, Hayama, 240-0112, Japan

4 School of Geography, University of Leeds, Leeds, LS2 9JT, UK

5 Joint Research Centre (JRC) Consultant, ARCADIA SIT s.r.l., Vigevano (PV), 27029, Italy

6 Forestry Division, FAO, Rome, 00153, Italy

7 University of Sopron, Forest Research Institute, Sopron, H-9400, Hungary

*Correspondence to:* Giacomo Grassi (giacomo.grassi@ec.europa.eu)

| List of tables and figures                                                                 | Page |
|--------------------------------------------------------------------------------------------|------|
| Suppl. table 1. Sources of data used                                                       | 4    |
| Suppl. table 2. Completeness of LULUCF reporting in the NGHGI DB                           | 7    |
| Suppl. table 3. Forest area in the NGHGI DB and FRA 2020                                   | 8    |
| Suppl. table 4. Net LULUCF CO <sub>2</sub> flux in the NGHGI DB, not gap-filled            | 9    |
| Suppl. table 5. Net LULUCF CO <sub>2</sub> flux in the NGHGI DB, gap-filled                | 11   |
| Suppl. table 6. CO <sub>2</sub> flux by land use category in the NGHGI DB, gap-filled      | 13   |
| Suppl. table 7. NAI countries: LULUCF in NC/BUR in the NGHGI DB, not gap-filled            | 15   |
| Suppl. table 8. NAI countries: LULUCF in NC/BUR in the UNFCCC GHGDI, not gap-filled        | 17   |
| Suppl. table 9. NAI countries: CO <sub>2</sub> flux from REDD+ submissions, not gap-filled | 19   |
| Suppl. table 10. NAI countries: LULUCF in NDC, not gap-filled                              | 21   |
| Suppl. figure 1. Forest sink per unit of forest area                                       | 23   |
| Suppl. figure 2. Assessment of completeness of C fluxes in NGHGI DB and FAOSTAT            | 24   |
| Suppl. figure 3. Comparison of alternative gap-filling procedures                          | 25   |
| Suppl. figure 4. Trends of deforestation in the NGHGI DB and FAOSTAT                       | 26   |

Data from this study are openly available via the Zenodo portal (Grassi G, Federici S, Abad Viñas R, Korosuo A, Rossi S (version March 2022). LULUCF data based on National GHG inventories (NGHGI DB), at <https://doi.org/10.5281/zenodo.6390739> .

**Acronyms:**

AI: Annex I countries

NAI: non-Annex I countries

GHG: Greenhouse Gas

NGHGI DB: National GHG Inventories DataBase (this study)

UNFCCC GHGDI: UNFCCC GHG Data Interface

NC: National Communications

BUR: Biennial Update Reports

REDD+ submissions: submissions under the United Nations climate change mitigation framework “Reducing Emissions from Deforestation and forest Degradation in developing countries” (REDD+). DEF: reducing emissions from deforestation. DEG: reducing emissions from forest degradation. CCS: conservation of forest-carbon stocks. ECS: enhancement of forest-carbon stock. SFM: sustainable management of forests.

NDC: Nationally Determined Contributions

FL: Forest land; NF: Non Forest Land; CL: Cropland; GL: Grassland

## **TABLES**

**Supplementary table 1.** Sources of data analyzed and selected for the NGHGI database. For each submission type, the year of the latest submission is indicated (for NDC, generally only submissions after 2020 are considered). Typically, the most recent source is selected in the NGHGI database, except when a clearly more complete dataset is available (e.g. NC/BUR are often more complete/disaggregated than NDC). In this case, an explanation is given under ‘relevant observations’. These exceptions typically do not significantly impact the carbon flux estimates (except for Central African Republic and, to a lesser extent, Mali).

|                        | Annex I (AI) or non-Annex I | SOURCES analysed (yr of last submission) |      |      |       |            | Source selected in the NGHGI dataset | Relevant observations                                                                                                                                                                                                                |                                                                                                                                                                                                                                                                                                                                                                                                                 |
|------------------------|-----------------------------|------------------------------------------|------|------|-------|------------|--------------------------------------|--------------------------------------------------------------------------------------------------------------------------------------------------------------------------------------------------------------------------------------|-----------------------------------------------------------------------------------------------------------------------------------------------------------------------------------------------------------------------------------------------------------------------------------------------------------------------------------------------------------------------------------------------------------------|
|                        |                             | GHGI                                     | NC   | BUR  | REDD+ | NDC        |                                      | On the source                                                                                                                                                                                                                        | On the data                                                                                                                                                                                                                                                                                                                                                                                                     |
| Afghanistan            | NAI                         |                                          | 2019 | 2019 |       |            | NC/BUR (2019)                        |                                                                                                                                                                                                                                      |                                                                                                                                                                                                                                                                                                                                                                                                                 |
| Albania                | NAI                         |                                          | 2016 | 2021 |       | 2021       | NC/BUR (2021)                        |                                                                                                                                                                                                                                      |                                                                                                                                                                                                                                                                                                                                                                                                                 |
| Algeria                | NAI                         |                                          | 2020 |      |       |            | NC/BUR (2020)                        |                                                                                                                                                                                                                                      |                                                                                                                                                                                                                                                                                                                                                                                                                 |
| Andorra                | NAI                         |                                          | 2021 | 2021 |       |            | NC/BUR (2021)                        |                                                                                                                                                                                                                                      |                                                                                                                                                                                                                                                                                                                                                                                                                 |
| Angola                 | NAI                         |                                          | 2021 |      |       | 2021       | NC/BUR (2021)                        | NC2 2021 used (Tab. 2) because more recent than NC1 (2012)                                                                                                                                                                           |                                                                                                                                                                                                                                                                                                                                                                                                                 |
| Antigua and Barbuda    | NAI                         |                                          | 2016 | 2020 |       | 2021       | NC/BUR (2020)                        | BUR more complete than NDC (but broadly consistent)                                                                                                                                                                                  |                                                                                                                                                                                                                                                                                                                                                                                                                 |
| Argentina              | NAI                         |                                          | 2015 | 2021 | 2019  | 2021       | NC/BUR (2021)                        |                                                                                                                                                                                                                                      | Share between categories in the period 2000-2017 done using data from 2018, assuming all categories constant except Deforestation                                                                                                                                                                                                                                                                               |
| Armenia                | NAI                         |                                          | 2020 | 2020 |       | 2021       | NC/BUR (2020)                        | No LULUCF data in the NDC                                                                                                                                                                                                            |                                                                                                                                                                                                                                                                                                                                                                                                                 |
| Australia              | AI                          | 2021                                     |      |      |       |            | GHGI (2021)                          |                                                                                                                                                                                                                                      | All lands considered managed                                                                                                                                                                                                                                                                                                                                                                                    |
| Austria                | AI                          | 2021                                     |      |      |       |            | GHGI (2021)                          |                                                                                                                                                                                                                                      |                                                                                                                                                                                                                                                                                                                                                                                                                 |
| Azerbaijan             | NAI                         |                                          | 2021 | 2018 |       |            | NC/BUR (2018)                        |                                                                                                                                                                                                                                      |                                                                                                                                                                                                                                                                                                                                                                                                                 |
| Bahamas                | NAI                         |                                          | 2015 |      |       |            | NC/BUR (2015)                        |                                                                                                                                                                                                                                      |                                                                                                                                                                                                                                                                                                                                                                                                                 |
| Bahrain                | NAI                         |                                          | 2020 |      |       | 2021       | NC/BUR (2020)                        | No historical LULUCF data in the NDC                                                                                                                                                                                                 |                                                                                                                                                                                                                                                                                                                                                                                                                 |
| Bangladesh             | NAI                         |                                          | 2018 |      | 2019  | 2021       | REDD+ (2019)                         | REDD+ (including DEF, DEG, ECS) more complete than NDC                                                                                                                                                                               |                                                                                                                                                                                                                                                                                                                                                                                                                 |
| Barbados               | NAI                         |                                          | 2018 |      |       | 2021       | NC/BUR (2018)                        | No historical LULUCF data in the NDC                                                                                                                                                                                                 |                                                                                                                                                                                                                                                                                                                                                                                                                 |
| Belarus                | AI                          | 2021                                     |      |      |       |            | GHGI (2021)                          |                                                                                                                                                                                                                                      |                                                                                                                                                                                                                                                                                                                                                                                                                 |
| Belgium                | AI                          | 2021                                     |      |      |       |            | GHGI (2021)                          |                                                                                                                                                                                                                                      |                                                                                                                                                                                                                                                                                                                                                                                                                 |
| Belize                 | NAI                         |                                          | 2016 | 2021 | 2020  | 2021       | NC/BUR (2021)                        |                                                                                                                                                                                                                                      |                                                                                                                                                                                                                                                                                                                                                                                                                 |
| Benin                  | NAI                         |                                          | 2019 | 2019 |       | 2021       | NC/BUR (2019)                        | NC more complete than NDC (but broadly consistent)                                                                                                                                                                                   |                                                                                                                                                                                                                                                                                                                                                                                                                 |
| Bhutan                 | NAI                         |                                          | 2021 |      | 2020  | 2021       | NC/BUR (2021)                        |                                                                                                                                                                                                                                      |                                                                                                                                                                                                                                                                                                                                                                                                                 |
| Bolivia                | NAI                         |                                          | 2020 |      |       |            | NC/BUR (2020)                        |                                                                                                                                                                                                                                      |                                                                                                                                                                                                                                                                                                                                                                                                                 |
| Bosnia and Herzegovina | NAI                         |                                          | 2017 | 2017 |       | 2021       | NC/BUR (2017)                        | No historical LULUCF data in the NDC                                                                                                                                                                                                 |                                                                                                                                                                                                                                                                                                                                                                                                                 |
| Botswana               | NAI                         |                                          | 2019 | 2019 |       |            | NC/BUR (2019)                        |                                                                                                                                                                                                                                      |                                                                                                                                                                                                                                                                                                                                                                                                                 |
| Brazil                 | NAI                         |                                          | 2020 | 2020 |       | 2021       | NC/BUR (2020)                        | NC4 2020 used (Appendix I) because more disaggregated and rich in information than BUR4 2020, even if not fully consistent (BUR4 has lower emission values).                                                                         | Data on C fluxes are from Appendix I of NC4 (2020). Data on forest area are from table 3.109 of NC3, for the year 2010. The area of managed forest includes primary forests in conservation areas.                                                                                                                                                                                                              |
| Brunei Darussalam      | NAI                         |                                          | 2017 |      |       |            | NC/BUR (2017)                        |                                                                                                                                                                                                                                      |                                                                                                                                                                                                                                                                                                                                                                                                                 |
| Bulgaria               | AI                          | 2021                                     |      |      |       |            | GHGI (2021)                          |                                                                                                                                                                                                                                      |                                                                                                                                                                                                                                                                                                                                                                                                                 |
| Burkina Faso           | NAI                         |                                          | 2015 | 2021 | 2020  | 2021       | NC/BUR (2021)                        |                                                                                                                                                                                                                                      |                                                                                                                                                                                                                                                                                                                                                                                                                 |
| Burundi                | NAI                         |                                          | 2019 |      |       | 2021       | NC/BUR (2019)                        | NC more complete than NDC (but broadly consistent)                                                                                                                                                                                   |                                                                                                                                                                                                                                                                                                                                                                                                                 |
| Cape Verde             | NAI                         |                                          | 2018 |      |       | 2021       | NC/BUR (2018)                        | NC more complete than NDC (but broadly consistent)                                                                                                                                                                                   |                                                                                                                                                                                                                                                                                                                                                                                                                 |
| Cambodia               | NAI                         |                                          | 2016 | 2020 | 2021  |            | REDD+ (2021)                         | REDD+ (including DEF, ECS) used because more recent than the NC2 (2016)                                                                                                                                                              |                                                                                                                                                                                                                                                                                                                                                                                                                 |
| Cameroon               | NAI                         |                                          | 2016 |      |       | 2021       | NC/BUR (2016)                        | No LULUCF data in the NDC                                                                                                                                                                                                            |                                                                                                                                                                                                                                                                                                                                                                                                                 |
| Canada                 | AI                          | 2021                                     |      |      |       |            | GHGI (2021)                          |                                                                                                                                                                                                                                      |                                                                                                                                                                                                                                                                                                                                                                                                                 |
| Central African Rep.   | NAI                         |                                          | 2015 |      |       | 2016, 2021 | NDC (2016)                           | NDC 2016 used (Fig. 1, including both emissions and removals) because more recent than NC2 (2015). Note that a more recent NDC (2021) was ignored because the reported sink (-0.7 GtCO <sub>2</sub> /yr) is biophysically impossible | Although not impossible, the forest sink in the NDC 2016 (-0.2 Gt CO <sub>2</sub> /yr) is considered implausible                                                                                                                                                                                                                                                                                                |
| Chad                   | NAI                         |                                          | 2013 |      |       | 2021       | NDC (2021)                           |                                                                                                                                                                                                                                      |                                                                                                                                                                                                                                                                                                                                                                                                                 |
| Chile                  | NAI                         |                                          | 2021 | 2021 | 2016  |            | NC/BUR (2021)                        |                                                                                                                                                                                                                                      |                                                                                                                                                                                                                                                                                                                                                                                                                 |
| China                  | NAI                         |                                          | 2019 | 2019 |       | 2021       | NC/BUR (2019)                        | No historical LULUCF data in the NDC. Note that BUR 4 (2020) reports slightly lower emission values than NC4. We used NC4 because more disaggregated and rich in information.                                                        | Values from BUR2, tab 2.10, 2.14, 2.15, 2.16. The values for 2005 and 2012 are not disaggregated into land use categories: here are assumed to represent the total LULUCF and allocated to different categories proportionally to the allocation reported in 2010. No explicit estimate of DEF is reported. The value of forest area found in BUR2 is taken, but slightly different values are reported in NC3. |
| Colombia               | NAI                         |                                          | 2017 | 2019 | 2020  |            | NC/BUR (2019)                        | BUR more complete than REDD+ (but broadly consistent)                                                                                                                                                                                | C fluxes are not estimated on all the forest area, but the extent of managed area is not clear. Here we computed the area of managed land from the info that bosque natural (considered C neutral) is 52% of total forest area.                                                                                                                                                                                 |
| Comoros                | NAI                         |                                          | 2013 |      |       | 2021       | NDC (2021)                           |                                                                                                                                                                                                                                      |                                                                                                                                                                                                                                                                                                                                                                                                                 |
| Congo                  | NAI                         |                                          | 2009 |      | 2016  | 2021       | NDC (2021)                           | NDC 2021 used (Tabs. 7 and 8) because more recent than                                                                                                                                                                               |                                                                                                                                                                                                                                                                                                                                                                                                                 |
| Cook Islands           | NAI                         |                                          | 2020 |      |       |            | NC/BUR (2020)                        |                                                                                                                                                                                                                                      |                                                                                                                                                                                                                                                                                                                                                                                                                 |
| Costa Rica             | NAI                         |                                          | 2021 | 2019 | 2016  |            | NC/BUR (2021)                        |                                                                                                                                                                                                                                      |                                                                                                                                                                                                                                                                                                                                                                                                                 |
| Cote d'Ivoire          | NAI                         |                                          | 2017 | 2018 | 2017  |            | REDD+ (2017)                         | REDD+ (including DEF, ECS) more complete than BUR                                                                                                                                                                                    |                                                                                                                                                                                                                                                                                                                                                                                                                 |
| Croatia                | AI                          | 2021                                     |      |      |       |            | GHGI (2021)                          |                                                                                                                                                                                                                                      |                                                                                                                                                                                                                                                                                                                                                                                                                 |
| Cuba                   | NAI                         |                                          | 2020 | 2020 |       |            | NC/BUR (2020)                        |                                                                                                                                                                                                                                      |                                                                                                                                                                                                                                                                                                                                                                                                                 |
| Cyprus                 | AI                          | 2021                                     |      |      |       |            | GHGI (2021)                          |                                                                                                                                                                                                                                      |                                                                                                                                                                                                                                                                                                                                                                                                                 |
| Czech Republic         | AI                          | 2021                                     |      |      |       |            | GHGI (2021)                          |                                                                                                                                                                                                                                      |                                                                                                                                                                                                                                                                                                                                                                                                                 |
| Dem. Rep. Korea        | NAI                         |                                          | 2013 |      |       |            | NC/BUR (2013)                        |                                                                                                                                                                                                                                      |                                                                                                                                                                                                                                                                                                                                                                                                                 |
| Dem. Rep. Congo (DRC)  | NAI                         |                                          | 2015 |      | 2018  | 2021       | NDC (2021)                           | NDC 2021 used (Fig. 1) because more recent than the NC3 (2015) and broadly consistent with REDD+ (2018). However, this source does not report any carbon sink from forest.                                                           | All emissions are assumed to come from deforestation. We assume that all the forest area mentioned in NDC is managed. Both C fluxes and managed forest area are very uncertain.                                                                                                                                                                                                                                 |
| Denmark                | AI                          | 2021                                     |      |      |       |            | GHGI (2021)                          |                                                                                                                                                                                                                                      |                                                                                                                                                                                                                                                                                                                                                                                                                 |
| Djibouti               | NAI                         |                                          | 2021 |      |       |            | NC/BUR (2021)                        |                                                                                                                                                                                                                                      |                                                                                                                                                                                                                                                                                                                                                                                                                 |
| Dominica               | NAI                         |                                          | 2020 |      |       | 2022       | NC/BUR (2020)                        | REDD+ fluxes are heavily affected by emissions from natural disturbances. Therefore NC3 (2020) is used                                                                                                                               |                                                                                                                                                                                                                                                                                                                                                                                                                 |
| Dominican Republic     | NAI                         |                                          | 2017 | 2020 | 2020  |            | REDD+ (2020)                         | REDD+ (including DEF, DEG, ECS) more complete than BUR                                                                                                                                                                               |                                                                                                                                                                                                                                                                                                                                                                                                                 |
| Ecuador                | NAI                         |                                          | 2017 | 2017 | 2020  |            | NC/BUR (2017)                        | NIR 2017 far more complete than REDD+ 2020 (which covers only DEF)                                                                                                                                                                   | The area of managed forest (5Mha), i.e. for which C fluxes are estimated, was derived from the NC3 (2017). Since REDD+ reports a total forest area of 15 Mha (broadly similar to total area under FAO-FRA 2020), we inferred about 10 Mha as "unmanaged" forest                                                                                                                                                 |
| Egypt                  | NAI                         |                                          | 2016 | 2019 |       |            | No estimate                          |                                                                                                                                                                                                                                      |                                                                                                                                                                                                                                                                                                                                                                                                                 |
| El Salvador            | NAI                         |                                          | 2018 | 2018 | 2021  | 2021       | REDD+ (2021)                         | REDD+ (including DEF, DEG, ECS) more complete than NDC                                                                                                                                                                               |                                                                                                                                                                                                                                                                                                                                                                                                                 |
| Equatorial Guinea      | NAI                         |                                          | 2019 |      | 2020  |            | REDD+ (2020)                         | REDD+ includes DEF, DEG                                                                                                                                                                                                              |                                                                                                                                                                                                                                                                                                                                                                                                                 |
| Eritrea                | NAI                         |                                          | 2021 | 2021 |       |            | NC/BUR (2021)                        |                                                                                                                                                                                                                                      |                                                                                                                                                                                                                                                                                                                                                                                                                 |
| Estonia                | AI                          | 2021                                     |      |      |       |            | GHGI (2021)                          |                                                                                                                                                                                                                                      |                                                                                                                                                                                                                                                                                                                                                                                                                 |

Supplementary table 1. (continues)

|                        | Annex I (AI) or non-Annex I (NAI) | SOURCES analysed (yr of last submission) |      |      |       |      | Source selected in the NGHGI dataset | Relevant observations                                                                                                                                                                                                                                                                                                                         |                                                                                                                                                                                                                                                                                                                                |
|------------------------|-----------------------------------|------------------------------------------|------|------|-------|------|--------------------------------------|-----------------------------------------------------------------------------------------------------------------------------------------------------------------------------------------------------------------------------------------------------------------------------------------------------------------------------------------------|--------------------------------------------------------------------------------------------------------------------------------------------------------------------------------------------------------------------------------------------------------------------------------------------------------------------------------|
|                        |                                   | GHGI                                     | NC   | BUR  | REDD+ | NDC  |                                      | On the source                                                                                                                                                                                                                                                                                                                                 | On the data                                                                                                                                                                                                                                                                                                                    |
| Ethiopia               | NAI                               |                                          | 2016 |      | 2017  | 2021 | NCBUR (2016)                         | NC used because much more complete, disaggregated and informative than the more recent NDC or REDD+ (and broadly consistent with)                                                                                                                                                                                                             | Numbers are from tab 3-30, and are in CO <sub>2</sub> -eq. Based on information that most of emissions are from deforestation in the year 2013 (p. 138 of the NC2), here all emissions from CL and GL are assumed to come from Deforestation for the whole time series. This is a simplification of the information in the NC. |
| Fiji                   | NAI                               |                                          | 2020 |      |       |      | NCBUR (2020)                         |                                                                                                                                                                                                                                                                                                                                               |                                                                                                                                                                                                                                                                                                                                |
| Finland                | AI                                | 2021                                     |      |      |       |      | GHGI (2021)                          |                                                                                                                                                                                                                                                                                                                                               |                                                                                                                                                                                                                                                                                                                                |
| France                 | AI                                | 2021                                     |      |      |       |      | GHGI (2021)                          |                                                                                                                                                                                                                                                                                                                                               |                                                                                                                                                                                                                                                                                                                                |
| Gabon                  | NAI                               |                                          | 2022 | 2021 | 2021  |      | NCBUR (2021)                         | BUR 2021 is broadly consistent with REDD+ and NC3                                                                                                                                                                                                                                                                                             |                                                                                                                                                                                                                                                                                                                                |
| Gambia                 | NAI                               |                                          | 2020 |      |       | 2021 | NCBUR (2020)                         | NC used because more complete than (and consistent with) NDC                                                                                                                                                                                                                                                                                  |                                                                                                                                                                                                                                                                                                                                |
| Georgia                | NAI                               |                                          | 2021 | 2019 |       | 2021 | NCBUR (2021)                         |                                                                                                                                                                                                                                                                                                                                               |                                                                                                                                                                                                                                                                                                                                |
| Germany                | AI                                | 2021                                     |      |      |       |      | GHGI (2021)                          |                                                                                                                                                                                                                                                                                                                                               |                                                                                                                                                                                                                                                                                                                                |
| Ghana                  | NAI                               |                                          | 2020 | 2021 | 2021  | 2021 | NCBUR (2021)                         | NC used because more complete than REDD+ (but not entirely consistent). No LULUCF data in the NDC.                                                                                                                                                                                                                                            |                                                                                                                                                                                                                                                                                                                                |
| Greece                 | AI                                | 2021                                     |      |      |       |      | GHGI (2021)                          |                                                                                                                                                                                                                                                                                                                                               |                                                                                                                                                                                                                                                                                                                                |
| Grenada                | NAI                               |                                          | 2019 |      |       |      | NCBUR (2019)                         |                                                                                                                                                                                                                                                                                                                                               |                                                                                                                                                                                                                                                                                                                                |
| Guatemala              | NAI                               |                                          | 2016 |      | 2022  |      | REDD+ (2022)                         | REDD+ includes DEF, DEG, ECS                                                                                                                                                                                                                                                                                                                  |                                                                                                                                                                                                                                                                                                                                |
| Guinea                 | NAI                               |                                          | 2018 |      |       | 2021 | NDC (2021)                           | NDC 2021 used (Tab. 7) because more recent than the NC2 (2018), even if no sink is reported. Note that the sink in the NC2 is biophysically impossible (-0.4 GtCO <sub>2</sub> /y over 5 Mha forest)                                                                                                                                          |                                                                                                                                                                                                                                                                                                                                |
| Guinea Bissau          | NAI                               |                                          | 2018 | 2020 | 2019  | 2021 | NCBUR (2020)                         | BUR more complete than NDC                                                                                                                                                                                                                                                                                                                    |                                                                                                                                                                                                                                                                                                                                |
| Guyana                 | NAI                               |                                          | 2012 |      | 2015  |      | REDD+ (2015)                         | REDD+ (covering DEF, DEG), used because more recent                                                                                                                                                                                                                                                                                           | No estimate for forest land                                                                                                                                                                                                                                                                                                    |
| Haiti                  | NAI                               |                                          | 2013 |      |       |      | NCBUR (2013)                         |                                                                                                                                                                                                                                                                                                                                               |                                                                                                                                                                                                                                                                                                                                |
| Honduras               | NAI                               |                                          | 2020 | 2020 | 2020  | 2021 | NCBUR (2020)                         | BUR more complete than NDC                                                                                                                                                                                                                                                                                                                    |                                                                                                                                                                                                                                                                                                                                |
| Hungary                | AI                                | 2021                                     |      |      |       |      | GHGI (2021)                          |                                                                                                                                                                                                                                                                                                                                               |                                                                                                                                                                                                                                                                                                                                |
| Iceland                | AI                                | 2021                                     |      |      |       |      | GHGI (2021)                          |                                                                                                                                                                                                                                                                                                                                               |                                                                                                                                                                                                                                                                                                                                |
| India                  | NAI                               |                                          | 2012 | 2021 | 2018  |      | NCBUR (2021)                         | BUR3 2021 used because more recent than NC3 2018.                                                                                                                                                                                                                                                                                             | Emissions from GL assumed to be due to Deforestation. Fluxes include non-CO <sub>2</sub> gases. C fluxes (table 2.35) and forest area (yr 2015, tab 2.26) are from BUR 3. We assume that all the forest area reported is managed.                                                                                              |
| Indonesia              | NAI                               |                                          | 2018 | 2021 | 2022  | 2021 | NCBUR (2021)                         | BUR3 2021 used (Tab. 2.17) because more recent than NC3 2018 and more complete than REDD+ (2022).                                                                                                                                                                                                                                             | Peat fires and peat decomposition are under Org soils. C fluxes (tab 2-17) and forest area (yr 2015, tab 1-8) are from BUR 3. We assume that all the forest area reported is managed                                                                                                                                           |
| Iran                   | NAI                               |                                          | 2018 |      |       |      | NCBUR (2018)                         |                                                                                                                                                                                                                                                                                                                                               |                                                                                                                                                                                                                                                                                                                                |
| Iraq                   | NAI                               |                                          | 2017 |      |       | 2021 |                                      |                                                                                                                                                                                                                                                                                                                                               |                                                                                                                                                                                                                                                                                                                                |
| Ireland                | AI                                | 2021                                     |      |      |       |      | GHGI (2021)                          |                                                                                                                                                                                                                                                                                                                                               |                                                                                                                                                                                                                                                                                                                                |
| Israel                 | NAI                               |                                          | 2018 | 2016 |       | 2021 | NCBUR (2016)                         | No LULUCF data in the NDC                                                                                                                                                                                                                                                                                                                     |                                                                                                                                                                                                                                                                                                                                |
| Italy                  | AI                                | 2021                                     |      |      |       |      | GHGI (2021)                          |                                                                                                                                                                                                                                                                                                                                               |                                                                                                                                                                                                                                                                                                                                |
| Jamaica                | NAI                               |                                          | 2019 | 2016 |       |      | NCBUR (2019)                         |                                                                                                                                                                                                                                                                                                                                               |                                                                                                                                                                                                                                                                                                                                |
| Japan                  | AI                                | 2021                                     |      |      |       |      | GHGI (2021)                          |                                                                                                                                                                                                                                                                                                                                               |                                                                                                                                                                                                                                                                                                                                |
| Jordan                 | NAI                               |                                          | 2014 | 2021 |       | 2021 | NCBUR (2021)                         |                                                                                                                                                                                                                                                                                                                                               |                                                                                                                                                                                                                                                                                                                                |
| Kazakhstan             | AI                                | 2021                                     |      |      |       |      | GHGI (2021)                          |                                                                                                                                                                                                                                                                                                                                               |                                                                                                                                                                                                                                                                                                                                |
| Kenya                  | NAI                               |                                          | 2015 |      | 2020  |      | REDD+ (2020)                         | REDD+ covers DEF, DEG, SMF, ECS                                                                                                                                                                                                                                                                                                               |                                                                                                                                                                                                                                                                                                                                |
| Kiribati               | NAI                               |                                          | 2013 |      |       |      |                                      |                                                                                                                                                                                                                                                                                                                                               |                                                                                                                                                                                                                                                                                                                                |
| Kuwait                 | NAI                               |                                          | 2019 | 2019 |       | 2021 | NDC (2021)                           |                                                                                                                                                                                                                                                                                                                                               |                                                                                                                                                                                                                                                                                                                                |
| Kyrgyzstan             | NAI                               |                                          | 2017 |      |       | 2021 | NDC (2021)                           |                                                                                                                                                                                                                                                                                                                                               |                                                                                                                                                                                                                                                                                                                                |
| Lao People's Dem. Rep. | NAI                               |                                          | 2013 | 2020 | 2018  | 2021 | NDC (2021)                           |                                                                                                                                                                                                                                                                                                                                               |                                                                                                                                                                                                                                                                                                                                |
| Latvia                 | AI                                | 2021                                     |      |      |       |      | GHGI (2021)                          |                                                                                                                                                                                                                                                                                                                                               |                                                                                                                                                                                                                                                                                                                                |
| Lebanon                | NAI                               |                                          | 2016 | 2021 |       | 2021 | NCBUR (2021)                         | No historical LULUCF data in the NDC                                                                                                                                                                                                                                                                                                          |                                                                                                                                                                                                                                                                                                                                |
| Lesotho                | NAI                               |                                          | 2021 | 2021 |       |      | NCBUR (2021)                         |                                                                                                                                                                                                                                                                                                                                               |                                                                                                                                                                                                                                                                                                                                |
| Liberia                | NAI                               |                                          | 2013 | 2021 | 2020  | 2021 | NCBUR (2021)                         | No historical LULUCF data in the NDC                                                                                                                                                                                                                                                                                                          |                                                                                                                                                                                                                                                                                                                                |
| Libya                  | NAI                               |                                          |      |      |       |      |                                      |                                                                                                                                                                                                                                                                                                                                               |                                                                                                                                                                                                                                                                                                                                |
| Liechtenstein          | AI                                | 2021                                     |      |      |       |      | GHGI (2021)                          |                                                                                                                                                                                                                                                                                                                                               |                                                                                                                                                                                                                                                                                                                                |
| Lithuania              | AI                                | 2021                                     |      |      |       |      | GHGI (2021)                          |                                                                                                                                                                                                                                                                                                                                               |                                                                                                                                                                                                                                                                                                                                |
| Luxembourg             | AI                                | 2021                                     |      |      |       |      | GHGI (2021)                          |                                                                                                                                                                                                                                                                                                                                               |                                                                                                                                                                                                                                                                                                                                |
| Malaysia               | NAI                               |                                          | 2018 | 2018 | 2019  | 2021 | NCBUR (2018)                         | BUR 2018 (tab 2.9) more complete than REDD+ (but consistent). No LULUCF data in the NDC                                                                                                                                                                                                                                                       | The sink is very high and here considered "implausible", but is consistently reported in various documents                                                                                                                                                                                                                     |
| Maldives               | NAI                               |                                          | 2018 | 2020 |       |      |                                      |                                                                                                                                                                                                                                                                                                                                               |                                                                                                                                                                                                                                                                                                                                |
| Mali                   | NAI                               |                                          | 2018 |      |       | 2021 | NCBUR (2018)                         | NC3 2018 used (tab. 42) because more complete than the more recent NDC 2021. The latter report include contradictory numbers between text and tables, and refer to a BUR 2019 that apparently does not exist. This choice has an impact of the net sink (for 2000-2020: -0.2 GtCO <sub>2</sub> /y in NC3 vs -0.3 GtCO <sub>2</sub> /y in NDC) | The sink in the NC is very high and here considered "implausible"                                                                                                                                                                                                                                                              |
| Malta                  | AI                                | 2021                                     |      |      |       |      | GHGI (2021)                          |                                                                                                                                                                                                                                                                                                                                               |                                                                                                                                                                                                                                                                                                                                |
| Marshall Islands       | NAI                               |                                          |      |      |       |      |                                      |                                                                                                                                                                                                                                                                                                                                               |                                                                                                                                                                                                                                                                                                                                |
| Mauritania             | NAI                               |                                          | 2019 | 2021 |       | 2021 | NCBUR (2021)                         |                                                                                                                                                                                                                                                                                                                                               |                                                                                                                                                                                                                                                                                                                                |
| Mauritius              | NAI                               |                                          | 2017 | 2021 |       | 2021 | NCBUR (2021)                         |                                                                                                                                                                                                                                                                                                                                               |                                                                                                                                                                                                                                                                                                                                |
| Mexico                 | NAI                               |                                          | 2019 | 2019 | 2020  |      | NCBUR (2019)                         | NIR 2019 used (Tabs. 5.23-5.32) because more recent than the NC5 (2012) and more complete than REDD+ (2020)                                                                                                                                                                                                                                   | C fluxes (tab 5.23) and forest area (yr 2015, tab 5.25) are from NC 6. We assume that all the forest area reported in NIR is managed                                                                                                                                                                                           |
| Micronesia             | NAI                               |                                          | 2015 |      |       |      | NCBUR (2015)                         |                                                                                                                                                                                                                                                                                                                                               |                                                                                                                                                                                                                                                                                                                                |
| Monaco                 | AI                                | 2021                                     |      |      |       |      | GHGI (2021)                          |                                                                                                                                                                                                                                                                                                                                               |                                                                                                                                                                                                                                                                                                                                |
| Mongolia               | NAI                               |                                          | 2018 | 2017 | 2018  |      | NCBUR (2018)                         | NC used because more complete than REDD+                                                                                                                                                                                                                                                                                                      |                                                                                                                                                                                                                                                                                                                                |
| Montenegro             | NAI                               |                                          | 2015 | 2022 |       | 2021 | NCBUR (2022)                         |                                                                                                                                                                                                                                                                                                                                               |                                                                                                                                                                                                                                                                                                                                |
| Morocco                | NAI                               |                                          | 2021 | 2019 |       | 2021 | NCBUR (2021)                         |                                                                                                                                                                                                                                                                                                                                               |                                                                                                                                                                                                                                                                                                                                |
| Mozambique             | NAI                               |                                          | 2006 |      | 2018  | 2021 | REDD+ (2018)                         | REDD+ covers only DEF. NC (2017) not taken also because it reports an implausible sink. No LULUCF data                                                                                                                                                                                                                                        |                                                                                                                                                                                                                                                                                                                                |
| Myanmar                | NAI                               |                                          | 2012 |      | 2018  | 2021 | REDD+ (2018)                         | REDD+ (covering DEF, ECS) used because NDC 2021 confirmed it as the correct source to look at.                                                                                                                                                                                                                                                |                                                                                                                                                                                                                                                                                                                                |
| Namibia                | NAI                               |                                          | 2020 | 2021 |       | 2021 | NCBUR (2021)                         | NIR 2019 used (Tab. 6.18) because more recent than NC3 (2015) and more complete than NDC 2021                                                                                                                                                                                                                                                 | The sink is very high and here considered "implausible".                                                                                                                                                                                                                                                                       |
| Nauru                  | NAI                               |                                          | 2015 |      |       |      |                                      |                                                                                                                                                                                                                                                                                                                                               |                                                                                                                                                                                                                                                                                                                                |
| Nepal                  | AI                                | 2021                                     |      |      | 2017  |      | NCBUR (2021)                         |                                                                                                                                                                                                                                                                                                                                               |                                                                                                                                                                                                                                                                                                                                |
| Netherlands            | AI                                | 2021                                     |      |      |       |      | GHGI (2021)                          |                                                                                                                                                                                                                                                                                                                                               |                                                                                                                                                                                                                                                                                                                                |
| New Zealand            | AI                                | 2021                                     |      |      |       |      | GHGI (2021)                          |                                                                                                                                                                                                                                                                                                                                               |                                                                                                                                                                                                                                                                                                                                |
| Nicaragua              | NAI                               |                                          | 2018 |      | 2019  |      | REDD+ (2019)                         | REDD+ includes DEF, DEG, ECS                                                                                                                                                                                                                                                                                                                  |                                                                                                                                                                                                                                                                                                                                |
| Niger                  | NAI                               |                                          | 2017 |      |       | 2021 | NCBUR (2017)                         | NC used because more complete than NDC                                                                                                                                                                                                                                                                                                        |                                                                                                                                                                                                                                                                                                                                |
| Nigeria                | NAI                               |                                          | 2020 | 2021 | 2019  | 2021 | NCBUR (2021)                         | BUR2 2021 used (Tab. 2.11) because more recent than the NC2 2014. Note that numbers in the NDC 2021 and BUR2 2021 report different numbers. Here the BUR is used because much more detailed                                                                                                                                                   |                                                                                                                                                                                                                                                                                                                                |

Supplementary table 1. (continues)

|                           | Annex I (AI) or non-Annex I (NAI) | SOURCES analysed (yr of last submission) |      |      |       |      | Source selected in the NGHGI dataset | Relevant observations                                                                                                                          |                                                                                                                                                                                                                                                                                                                                                                                                                                                                       |
|---------------------------|-----------------------------------|------------------------------------------|------|------|-------|------|--------------------------------------|------------------------------------------------------------------------------------------------------------------------------------------------|-----------------------------------------------------------------------------------------------------------------------------------------------------------------------------------------------------------------------------------------------------------------------------------------------------------------------------------------------------------------------------------------------------------------------------------------------------------------------|
|                           |                                   | GHGI                                     | NC   | BUR  | REDD+ | NDC  |                                      | On the source                                                                                                                                  | On the data                                                                                                                                                                                                                                                                                                                                                                                                                                                           |
| Niue                      | NAI                               |                                          | 2016 |      |       |      | NC/BUR (2016)                        |                                                                                                                                                |                                                                                                                                                                                                                                                                                                                                                                                                                                                                       |
| Norway                    | AI                                | 2021                                     |      |      |       |      | GHGI (2021)                          |                                                                                                                                                |                                                                                                                                                                                                                                                                                                                                                                                                                                                                       |
| Oman                      | NAI                               |                                          | 2019 | 2019 |       | 2021 |                                      |                                                                                                                                                |                                                                                                                                                                                                                                                                                                                                                                                                                                                                       |
| Pakistan                  | NAI                               |                                          | 2019 |      | 2020  | 2021 | NC/BUR (2019)                        | NC used because more complete than REDD+ (only DEF) and of NDC                                                                                 |                                                                                                                                                                                                                                                                                                                                                                                                                                                                       |
| Palau                     | NAI                               |                                          | 2019 |      |       |      | NC/BUR (2019)                        |                                                                                                                                                |                                                                                                                                                                                                                                                                                                                                                                                                                                                                       |
| Panama                    | NAI                               |                                          | 2018 | 2021 | 2022  |      | REDD+ (2022)                         |                                                                                                                                                |                                                                                                                                                                                                                                                                                                                                                                                                                                                                       |
| Papua New Guinea          | NAI                               |                                          | 2015 | 2019 | 2017  |      | NC/BUR (2019)                        | BUR1 2019 used (Fig. 2.11) because more recent than the NC2 2015                                                                               | According to the BUR "The distinction between managed and unmanaged lands has not been carried out yet and it is assumed that all land areas in PNG are managed"                                                                                                                                                                                                                                                                                                      |
| Paraguay                  | NAI                               |                                          | 2017 | 2021 | 2022  | 2021 | NC/BUR (2021)                        | BUR more complete than REDD+ (which includes only DEF)                                                                                         |                                                                                                                                                                                                                                                                                                                                                                                                                                                                       |
| Peru                      | NAI                               |                                          | 2016 | 2019 | 2021  |      | NC/BUR (2019)                        | NIR 2019 (tab. 86) more complete than REDD+ (which includes only DEF)                                                                          | The forest area is taken from NC 3 (74 Mha, broadly consistent with NIR 2019 and REDD+). Since the NIR specifies that the C flux is reported only for Secondary forest, FL-FL is a source and a sink is reported only for L-FL, here we use data on Bosques de Producción Permanente (18 Mha) from the NC3, which appears to be the area for which C fluxes are estimated. Based on this information, we then inferred the area of unmanaged forest as 74-18 = 56 Mha |
| Philippines               | NAI                               |                                          | 2014 |      |       | 2021 | NC/BUR (2014)                        | Data from NC2 2014 (tab 2.7). No historical LULUCF data in the NDC                                                                             | The sink is very high and here considered "implausible"                                                                                                                                                                                                                                                                                                                                                                                                               |
| Poland                    | AI                                | 2021                                     |      |      |       |      | GHGI (2021)                          |                                                                                                                                                |                                                                                                                                                                                                                                                                                                                                                                                                                                                                       |
| Portugal                  | AI                                | 2021                                     |      |      |       |      | GHGI (2021)                          |                                                                                                                                                |                                                                                                                                                                                                                                                                                                                                                                                                                                                                       |
| Qatar                     | NAI                               |                                          | 2011 |      |       | 2021 |                                      |                                                                                                                                                |                                                                                                                                                                                                                                                                                                                                                                                                                                                                       |
| Republic of Korea         | NAI                               |                                          | 2019 | 2021 |       |      | NC/BUR (2021)                        |                                                                                                                                                |                                                                                                                                                                                                                                                                                                                                                                                                                                                                       |
| Republic of Moldova       | NAI                               |                                          | 2018 | 2016 |       |      | NC/BUR (2018)                        |                                                                                                                                                |                                                                                                                                                                                                                                                                                                                                                                                                                                                                       |
| Romania                   | AI                                | 2021                                     |      |      |       |      | GHGI (2021)                          |                                                                                                                                                |                                                                                                                                                                                                                                                                                                                                                                                                                                                                       |
| Russian Federation        | AI                                | 2021                                     |      |      |       |      | GHGI (2021)                          |                                                                                                                                                |                                                                                                                                                                                                                                                                                                                                                                                                                                                                       |
| Rwanda                    | NAI                               |                                          | 2018 | 2021 |       |      | NC/BUR (2021)                        |                                                                                                                                                |                                                                                                                                                                                                                                                                                                                                                                                                                                                                       |
| Saint Kitts and Nevis     | NAI                               |                                          | 2017 |      | 2021  |      | NC/BUR (2017)                        | BUR more complete than NDC                                                                                                                     |                                                                                                                                                                                                                                                                                                                                                                                                                                                                       |
| Saint Lucia               | NAI                               |                                          | 2017 |      | 2021  |      | REDD+ (2021)                         | REDD+ (DEF, DEG, ECS) more complete than NDC                                                                                                   |                                                                                                                                                                                                                                                                                                                                                                                                                                                                       |
| Saint Vincent and Grenad. | NAI                               |                                          | 2016 |      |       |      | NC/BUR (2016)                        |                                                                                                                                                |                                                                                                                                                                                                                                                                                                                                                                                                                                                                       |
| Samoa                     | NAI                               |                                          | 2010 |      | 2021  |      | NDC (2021)                           |                                                                                                                                                |                                                                                                                                                                                                                                                                                                                                                                                                                                                                       |
| San Marino                | NAI                               |                                          | 2013 |      |       |      | NC/BUR (2013)                        |                                                                                                                                                |                                                                                                                                                                                                                                                                                                                                                                                                                                                                       |
| Sao Tome and Principe     | NAI                               |                                          | 2019 |      | 2021  |      | NC/BUR (2019)                        | NC more complete than NDC                                                                                                                      |                                                                                                                                                                                                                                                                                                                                                                                                                                                                       |
| Saudi Arabia              | NAI                               |                                          | 2016 | 2018 | 2021  |      | NC/BUR (2018)                        | BUR more complete than NDC                                                                                                                     |                                                                                                                                                                                                                                                                                                                                                                                                                                                                       |
| Senegal                   | NAI                               |                                          | 2016 |      | 2020  |      | NDC (2020)                           |                                                                                                                                                | No estimate for deforestation                                                                                                                                                                                                                                                                                                                                                                                                                                         |
| Serbia                    | NAI                               |                                          | 2017 | 2016 |       |      | NC/BUR (2016)                        |                                                                                                                                                |                                                                                                                                                                                                                                                                                                                                                                                                                                                                       |
| Seychelles                | NAI                               |                                          | 2013 |      | 2021  |      | NC/BUR (2013)                        | No historical LULUCF data in the NDC                                                                                                           |                                                                                                                                                                                                                                                                                                                                                                                                                                                                       |
| Sierra Leone              | NAI                               |                                          | 2012 |      | 2021  |      | No estimate ( )                      |                                                                                                                                                |                                                                                                                                                                                                                                                                                                                                                                                                                                                                       |
| Singapore                 | NAI                               |                                          | 2018 | 2016 |       |      | NC/BUR (2016)                        |                                                                                                                                                |                                                                                                                                                                                                                                                                                                                                                                                                                                                                       |
| Slovakia                  | AI                                | 2021                                     |      |      |       |      | GHGI (2021)                          |                                                                                                                                                |                                                                                                                                                                                                                                                                                                                                                                                                                                                                       |
| Slovenia                  | AI                                | 2021                                     |      |      |       |      | GHGI (2021)                          |                                                                                                                                                |                                                                                                                                                                                                                                                                                                                                                                                                                                                                       |
| Solomon Islands           | NAI                               |                                          | 2017 |      | 2019  | 2021 | REDD+ (2019)                         | REDD+ (DEF, DEG, ECS) more complete than NDC                                                                                                   |                                                                                                                                                                                                                                                                                                                                                                                                                                                                       |
| Somalia                   | NAI                               |                                          | 2019 |      |       | 2021 | NC/BUR (2019)                        | BUR more complete than NDC (where LULUCF values seem unclear)                                                                                  |                                                                                                                                                                                                                                                                                                                                                                                                                                                                       |
| South Africa              | NAI                               |                                          | 2018 | 2021 |       | 2021 | NC/BUR (2021)                        | No historical LULUCF data in the NDC                                                                                                           |                                                                                                                                                                                                                                                                                                                                                                                                                                                                       |
| South Sudan               | NAI                               |                                          | 2019 |      |       | 2021 | NC/BUR (2019)                        | BUR more complete than NDC (where LULUCF values seem unclear)                                                                                  |                                                                                                                                                                                                                                                                                                                                                                                                                                                                       |
| Spain                     | AI                                | 2021                                     |      |      |       |      | GHGI (2021)                          |                                                                                                                                                |                                                                                                                                                                                                                                                                                                                                                                                                                                                                       |
| Sri Lanka                 | NAI                               |                                          | 2012 |      | 2017  | 2021 | REDD+ (2017)                         | REDD+ (DEF, ECS) more complete than NDC                                                                                                        |                                                                                                                                                                                                                                                                                                                                                                                                                                                                       |
| Sudan                     | NAI                               |                                          | 2013 |      | 2020  | 2021 | NC/BUR (2013)                        | NC more complete than NDC. REDD+ (DEF) not taken because sub-national.                                                                         |                                                                                                                                                                                                                                                                                                                                                                                                                                                                       |
| Suriname                  | NAI                               |                                          | 2016 |      | 2021  |      | REDD+ (2021)                         |                                                                                                                                                |                                                                                                                                                                                                                                                                                                                                                                                                                                                                       |
| Swaziland                 | NAI                               |                                          | 2016 |      |       |      | NC/BUR (2016)                        |                                                                                                                                                |                                                                                                                                                                                                                                                                                                                                                                                                                                                                       |
| Sweden                    | AI                                | 2021                                     |      |      |       |      | GHGI (2021)                          |                                                                                                                                                |                                                                                                                                                                                                                                                                                                                                                                                                                                                                       |
| Switzerland               | AI                                | 2021                                     |      |      |       |      | GHGI (2021)                          |                                                                                                                                                |                                                                                                                                                                                                                                                                                                                                                                                                                                                                       |
| Syrian Arab Republic      | NAI                               |                                          | 2010 |      |       |      | NC/BUR (2010)                        |                                                                                                                                                |                                                                                                                                                                                                                                                                                                                                                                                                                                                                       |
| Tajikistan                | NAI                               |                                          | 2014 | 2019 |       | 2021 | NDC (2021)                           |                                                                                                                                                |                                                                                                                                                                                                                                                                                                                                                                                                                                                                       |
| Thailand                  | NAI                               |                                          | 2018 | 2020 | 2021  |      | REDD+ (2021)                         | REDD+ 2021 (including DEF, DEG, ECS) used because more recent and complete than the NC3 (2018)                                                 |                                                                                                                                                                                                                                                                                                                                                                                                                                                                       |
| Macedonia                 | NAI                               |                                          |      |      | 2021  |      | NDC (2021)                           |                                                                                                                                                |                                                                                                                                                                                                                                                                                                                                                                                                                                                                       |
| Timor-Leste               | NAI                               |                                          | 2020 | 2020 |       |      | NC/BUR (2020)                        |                                                                                                                                                |                                                                                                                                                                                                                                                                                                                                                                                                                                                                       |
| Togo                      | NAI                               |                                          | 2015 | 2017 | 2020  | 2021 | REDD+ (2020)                         | REDD+ (DEF, ECS) more complete than NDC                                                                                                        |                                                                                                                                                                                                                                                                                                                                                                                                                                                                       |
| Tonga                     | NAI                               |                                          | 2020 |      |       |      | NC/BUR (2020)                        |                                                                                                                                                |                                                                                                                                                                                                                                                                                                                                                                                                                                                                       |
| Trinidad and Tobago       | NAI                               |                                          | 2021 |      |       |      | NC/BUR (2021)                        |                                                                                                                                                |                                                                                                                                                                                                                                                                                                                                                                                                                                                                       |
| Tunisia                   | NAI                               |                                          | 2019 | 2016 |       | 2021 | NC/BUR (2019)                        | No historical LULUCF data in the NDC                                                                                                           |                                                                                                                                                                                                                                                                                                                                                                                                                                                                       |
| Turkey                    | AI                                | 2021                                     |      |      |       |      | GHGI (2021)                          |                                                                                                                                                |                                                                                                                                                                                                                                                                                                                                                                                                                                                                       |
| Turkmenistan              | NAI                               |                                          | 2016 |      |       |      | NC/BUR (2016)                        |                                                                                                                                                |                                                                                                                                                                                                                                                                                                                                                                                                                                                                       |
| Tuvalu                    | NAI                               |                                          | 2018 |      |       |      | NC/BUR (2018)                        |                                                                                                                                                |                                                                                                                                                                                                                                                                                                                                                                                                                                                                       |
| Uganda                    | NAI                               |                                          | 2014 | 2019 | 2018  | 2021 | NC/BUR (2019)                        | No historical LULUCF data in the NDC                                                                                                           |                                                                                                                                                                                                                                                                                                                                                                                                                                                                       |
| Ukraine                   | AI                                | 2021                                     |      |      |       |      | GHGI (2021)                          |                                                                                                                                                |                                                                                                                                                                                                                                                                                                                                                                                                                                                                       |
| United Arab Emirates      | NAI                               |                                          | 2019 |      |       |      | NC/BUR (2019)                        |                                                                                                                                                |                                                                                                                                                                                                                                                                                                                                                                                                                                                                       |
| United Kingdom            | AI                                | 2021                                     |      |      |       |      | GHGI (2021)                          |                                                                                                                                                |                                                                                                                                                                                                                                                                                                                                                                                                                                                                       |
| United Rep. of Tanzania   | NAI                               |                                          | 2015 |      | 2017  | 2021 | NDC (2021)                           |                                                                                                                                                |                                                                                                                                                                                                                                                                                                                                                                                                                                                                       |
| United States of America  | AI                                | 2021                                     |      |      |       |      | GHGI (2021)                          |                                                                                                                                                |                                                                                                                                                                                                                                                                                                                                                                                                                                                                       |
| Uruguay                   | NAI                               |                                          | 2019 | 2021 |       |      | NC/BUR (2021)                        |                                                                                                                                                |                                                                                                                                                                                                                                                                                                                                                                                                                                                                       |
| Uzbekistan                | NAI                               |                                          | 2017 | 2021 |       | 2021 | NC/BUR (2021)                        | BUR more complete than NDC.                                                                                                                    |                                                                                                                                                                                                                                                                                                                                                                                                                                                                       |
| Vanuatu                   | NAI                               |                                          | 2021 | 2021 |       | 2021 | NC/BUR (2021)                        | No historical LULUCF data in the NDC                                                                                                           |                                                                                                                                                                                                                                                                                                                                                                                                                                                                       |
| Venezuela                 | NAI                               |                                          | 2018 |      |       | 2021 | NC/BUR (2018)                        | No historical LULUCF data in the NDC                                                                                                           | We assume that all the forest area reported in NC2 is managed                                                                                                                                                                                                                                                                                                                                                                                                         |
| Viet Nam                  | NAI                               |                                          | 2019 | 2021 | 2016  |      | NC/BUR (2021)                        |                                                                                                                                                |                                                                                                                                                                                                                                                                                                                                                                                                                                                                       |
| Yemen                     | NAI                               |                                          | 2018 | 2018 |       |      | NC/BUR (2018)                        |                                                                                                                                                |                                                                                                                                                                                                                                                                                                                                                                                                                                                                       |
| Zambia                    | NAI                               |                                          | 2020 | 2020 | 2021  | 2021 | NC/BUR (2020)                        | NC more complete than REDD+, but not consistent (REDD+ has smaller emissions). No historical LULUCF data in the NDC                            |                                                                                                                                                                                                                                                                                                                                                                                                                                                                       |
| Zimbabwe                  | NAI                               |                                          | 2017 | 2021 |       | 2021 | NC/BUR (2021)                        | BUR1 2021 used (based on Fig. 2.18) because more recent than the NC3 (2017) and more complete than NDC 2021 (where LULUCF values seem unclear) |                                                                                                                                                                                                                                                                                                                                                                                                                                                                       |

**Supplementary table 2.** Completeness of LULUCF reporting in terms of land categories uses in our NGHGI DB.

|                        | Completeness of reporting in our NGHGI DB |             |           |            |       |
|------------------------|-------------------------------------------|-------------|-----------|------------|-------|
|                        | LULUCF                                    | Forest land | Deforest. | Org. soils | Other |
| Afghanistan            | x                                         | x           | x         |            |       |
| Albania                | x                                         | x           | x         |            | x     |
| Algeria                | x                                         | x           |           |            |       |
| Andorra                | x                                         | x           |           |            |       |
| Angola                 | x                                         | x           | x         |            |       |
| Antigua and Barbuda    | x                                         | x           |           |            |       |
| Argentina              | x                                         | x           | x         |            | x     |
| Armenia                | x                                         | x           | x         |            | x     |
| Australia              | x                                         | x           | x         | x          | x     |
| Austria                | x                                         | x           | x         | x          | x     |
| Azerbaijan             | x                                         | x           |           |            |       |
| Bahamas                | x                                         | x           |           |            |       |
| Bahrain                | x                                         | x           |           |            |       |
| Bangladesh             | x                                         | x           | x         |            |       |
| Barbados               | x                                         | x           |           |            |       |
| Belarus                | x                                         | x           |           | x          | x     |
| Belgium                | x                                         | x           | x         | x          |       |
| Belize                 | x                                         | x           | x         |            | x     |
| Benin                  | x                                         | x           | x         |            | x     |
| Bhutan                 | x                                         | x           | x         |            |       |
| Bolivia                | x                                         | x           | x         |            | x     |
| Bosnia and Herzegovina | x                                         | x           |           |            |       |
| Botswana               | x                                         | x           | x         |            |       |
| Brazil                 | x                                         | x           | x         |            | x     |
| Brunei Darussalam      | x                                         | x           | x         |            | x     |
| Bulgaria               | x                                         | x           | x         |            | x     |
| Burkina Faso           | x                                         | x           | x         |            |       |
| Burundi                | x                                         | x           |           |            |       |
| Cape Verde             | x                                         | x           |           |            |       |
| Cambodia               | x                                         | x           | x         |            |       |
| Cameroon               | x                                         | x           | x         |            | x     |
| Canada                 | x                                         | x           | x         | x          | x     |
| Central African Rep.   | x                                         | x           | x         |            | x     |
| Chad                   | x                                         | x           |           |            | x     |
| Chile                  | x                                         | x           | x         |            | x     |
| China                  | x                                         | x           |           |            | x     |
| Colombia               | x                                         | x           | x         |            |       |
| Comoros                | x                                         | x           |           |            | x     |
| Congo                  | x                                         | x           | x         |            | x     |
| Cook Islands           | x                                         | x           |           |            |       |
| Costa Rica             | x                                         | x           | x         |            |       |
| Cote d'Ivoire          | x                                         | x           | x         |            |       |
| Croatia                | x                                         | x           | x         | x          | x     |
| Cuba                   | x                                         | x           |           |            |       |
| Cyprus                 | x                                         | x           | x         |            | x     |
| Czech Republic         | x                                         | x           | x         |            | x     |
| Dem. Rep. Korea        | x                                         | x           | x         |            |       |
| Dem. Rep. Congo (DRC)  | x                                         | x           | x         |            |       |
| Denmark                | x                                         | x           | x         | x          | x     |
| Djibouti               | x                                         | x           |           |            |       |
| Dominica               | x                                         | x           |           |            |       |
| Dominican Republic     | x                                         | x           | x         |            |       |
| Ecuador                | x                                         | x           | x         |            |       |
| Egypt                  |                                           |             |           |            | x     |
| El Salvador            | x                                         | x           | x         |            |       |
| Equatorial Guinea      | x                                         | x           | x         |            | x     |
| Eritrea                | x                                         | x           |           |            |       |
| Estonia                | x                                         | x           | x         | x          | x     |
| Ethiopia               | x                                         | x           | x         |            | x     |
| Fiji                   | x                                         | x           |           |            |       |
| Finland                | x                                         | x           | x         | x          | x     |
| France                 | x                                         | x           | x         |            | x     |
| Gabon                  | x                                         | x           | x         |            | x     |
| Gambia                 | x                                         | x           | x         |            |       |
| Georgia                | x                                         | x           |           |            | x     |
| Germany                | x                                         | x           | x         | x          | x     |
| Ghana                  | x                                         | x           | x         |            |       |
| Greece                 | x                                         | x           | x         | x          | x     |
| Grenada                | x                                         | x           |           |            |       |
| Guatemala              | x                                         | x           | x         |            |       |
| Guinea                 | x                                         | x           | x         |            | x     |
| Guinea Bissau          | x                                         | x           |           |            | x     |
| Guyana                 | x                                         |             | x         |            |       |
| Haiti                  | x                                         | x           | x         |            |       |
| Honduras               | x                                         | x           | x         |            |       |
| Hungary                | x                                         | x           | x         | x          | x     |
| Iceland                | x                                         | x           | x         | x          |       |
| India                  | x                                         | x           |           |            |       |
| Indonesia              | x                                         | x           | x         | x          | x     |
| Iran                   | x                                         | x           | x         |            |       |
| Iraq                   |                                           |             |           |            | x     |
| Ireland                | x                                         | x           | x         | x          | x     |
| Israel                 | x                                         | x           |           |            |       |
| Italy                  | x                                         | x           | x         | x          | x     |
| Jamaica                | x                                         | x           | x         |            |       |
| Japan                  | x                                         | x           | x         | x          | x     |
| Jordan                 | x                                         | x           |           |            |       |
| Kazakhstan             | x                                         | x           |           |            | x     |
| Kenya                  | x                                         | x           | x         |            |       |
| Kiribati               |                                           |             |           |            | x     |
| Kuwait                 | x                                         | x           |           |            |       |
| Kyrgyzstan             | x                                         | x           |           |            | x     |
| Lao People's Dem. Rep. | x                                         | x           | x         |            |       |
| Latvia                 | x                                         | x           | x         | x          | x     |
| Lebanon                | x                                         | x           | x         |            | x     |
| Lesotho                | x                                         | x           |           |            |       |
| Liberia                | x                                         | x           | x         |            |       |
| Libya                  |                                           |             |           |            | x     |

|                           | Completeness of reporting in our NGHGI DB |             |           |            |       |
|---------------------------|-------------------------------------------|-------------|-----------|------------|-------|
|                           | LULUCF                                    | Forest land | Deforest. | Org. soils | Other |
| Liechtenstein             | x                                         | x           | x         | x          |       |
| Lithuania                 | x                                         | x           | x         |            | x     |
| Luxembourg                | x                                         | x           | x         |            |       |
| Madagascar                | x                                         | x           | x         |            |       |
| Malawi                    | x                                         | x           | x         |            |       |
| Malaysia                  | x                                         | x           | x         |            |       |
| Maldives                  |                                           |             |           |            |       |
| Mali                      | x                                         | x           | x         |            |       |
| Malta                     | x                                         |             |           |            |       |
| Marshall Islands          |                                           |             |           |            | x     |
| Mauritania                | x                                         | x           |           |            |       |
| Mauritius                 | x                                         | x           |           |            |       |
| Mexico                    | x                                         | x           | x         |            | x     |
| Micronesia                | x                                         | x           |           |            |       |
| Monaco                    | x                                         |             |           |            |       |
| Mongolia                  | x                                         | x           |           |            |       |
| Montenegro                | x                                         | x           |           |            |       |
| Morocco                   | x                                         | x           |           |            |       |
| Mozambique                | x                                         |             | x         |            |       |
| Myanmar                   | x                                         | x           | x         |            |       |
| Namibia                   | x                                         | x           | x         |            |       |
| Nauru                     |                                           |             |           |            | x     |
| Nepal                     | x                                         | x           |           |            |       |
| Netherlands               | x                                         | x           | x         | x          | x     |
| New Zealand               | x                                         | x           | x         | x          | x     |
| Nicaragua                 | x                                         | x           | x         |            |       |
| Niger                     | x                                         | x           | x         |            | x     |
| Nigeria                   | x                                         | x           | x         |            |       |
| Niue                      | x                                         | x           |           |            |       |
| Norway                    | x                                         | x           | x         | x          |       |
| Oman                      |                                           |             |           |            |       |
| Pakistan                  | x                                         | x           | x         |            |       |
| Palau                     | x                                         | x           |           |            |       |
| Panama                    | x                                         | x           | x         |            |       |
| Papua New Guinea          | x                                         | x           | x         |            |       |
| Paraguay                  | x                                         | x           | x         |            |       |
| Peru                      | x                                         | x           | x         |            |       |
| Philippines               | x                                         | x           |           |            |       |
| Poland                    | x                                         | x           | x         | x          | x     |
| Portugal                  | x                                         | x           | x         |            |       |
| Qatar                     |                                           |             |           |            | x     |
| Republic of Korea         | x                                         | x           |           |            | x     |
| Republic of Moldova       | x                                         | x           | x         |            | x     |
| Romania                   | x                                         | x           | x         | x          | x     |
| Russian Federation        | x                                         | x           | x         | x          | x     |
| Rwanda                    | x                                         | x           |           |            |       |
| Saint Kitts and Nevis     | x                                         | x           |           |            |       |
| Saint Lucia               | x                                         | x           | x         |            |       |
| Saint Vincent and Grenad. | x                                         | x           |           |            |       |
| Samoa                     | x                                         | x           |           |            | x     |
| San Marino                | x                                         | x           |           |            |       |
| Sao Tome and Principe     | x                                         | x           |           |            |       |
| Saudi Arabia              | x                                         | x           |           |            |       |
| Senegal                   | x                                         | x           |           |            | x     |
| Serbia                    | x                                         | x           |           |            |       |
| Seychelles                | x                                         | x           |           |            |       |
| Sierra Leone              |                                           |             |           |            | x     |
| Singapore                 | x                                         | x           |           |            |       |
| Slovakia                  | x                                         | x           | x         |            | x     |
| Slovenia                  | x                                         | x           | x         | x          | x     |
| Solomon Islands           | x                                         | x           | x         |            | x     |
| Somalia                   | x                                         | x           | x         |            |       |
| South Africa              | x                                         | x           | x         |            | x     |
| South Sudan               | x                                         | x           | x         |            |       |
| Spain                     | x                                         | x           | x         |            | x     |
| Sri Lanka                 | x                                         | x           | x         |            |       |
| Sudan                     | x                                         | x           | x         |            |       |
| Suriname                  | x                                         | x           | x         |            |       |
| Swaziland                 | x                                         | x           | x         |            | x     |
| Sweden                    | x                                         | x           | x         | x          | x     |
| Switzerland               | x                                         | x           | x         | x          |       |
| Syrian Arab Republic      | x                                         | x           |           |            |       |
| Tajikistan                | x                                         | x           |           |            | x     |
| Thailand                  | x                                         | x           | x         |            |       |
| Macedonia                 | x                                         | x           |           |            | x     |
| Timor-Leste               | x                                         | x           | x         |            |       |
| Togo                      | x                                         | x           | x         |            |       |
| Tonga                     | x                                         | x           |           |            |       |
| Trinidad and Tobago       | x                                         | x           |           |            |       |
| Tunisia                   | x                                         | x           | x         |            | x     |
| Turkey                    | x                                         | x           | x         | x          | x     |
| Turkmenistan              | x                                         | x           |           |            |       |
| Tuvalu                    | x                                         | x           |           |            |       |
| Uganda                    | x                                         | x           | x         |            |       |
| Ukraine                   | x                                         | x           | x         | x          | x     |
| United Arab Emirates      | x                                         | x           |           |            |       |
| United Kingdom            | x                                         | x           | x         | x          | x     |
| United Rep. of Tanzania   | x                                         | x           | x         |            |       |
| United States of America  | x                                         | x           | x         | x          | x     |
| Uruguay                   | x                                         | x           | x         |            | x     |
| Uzbekistan                | x                                         | x           | x         |            |       |
| Vanuatu                   | x                                         | x           |           |            |       |
| Venezuela                 | x                                         | x           | x         |            |       |
| Viet Nam                  | x                                         | x           | x         |            | x     |
| Yemen                     | x                                         | x           | x         |            |       |
| Zambia                    | x                                         | x           | x         |            |       |
| Zimbabwe                  | x                                         | x           | x         |            |       |

**Supplementary table 3.** Forest area (Mha) for the year 2015, from NGHIs (managed and unmanaged forest) and from FRA 2020 (secondary forest + plantations and primary forest). The notation “F” indicates when FRA data (FAO, 2020) for secondary forest + plantations is used to fill the gaps in managed forest area within our NGHIs DB.

|                        | Forest area, gap-filled data (Mha, yr 2015) |          |       |              |         |       |
|------------------------|---------------------------------------------|----------|-------|--------------|---------|-------|
|                        | NGHIs DB                                    |          |       | FAO-FRA 2020 |         |       |
|                        | Managed                                     | Unmanag. | Total | Sec.+plant.  | Primary | Total |
| Afghanistan            | 2                                           |          | 2     | 1            | 0       | 1     |
| Albania                | 1                                           |          | 1     | 1            | 0       | 1     |
| Algeria                | 2                                           |          | 2     | 2            | 0       | 2     |
| Andorra                | 0                                           |          | 0     | 0            | 0       | 0     |
| Angola                 | 53                                          |          | 53    | 43           | 27      | 69    |
| Antigua and Barbuda    | 0                                           |          | 0     | 0            | 0       | 0     |
| Argentina              | 49                                          |          | 49    | 29           | 0       | 29    |
| Armenia                | 0                                           |          | 0     | 0            | 0       | 0     |
| Australia              | 133                                         |          | 133   | 129          | 5       | 133   |
| Austria                | 4                                           |          | 4     | 4            | 0       | 4     |
| Azerbaijan             | 1                                           |          | 1     | 1            | 0       | 1     |
| Bahamas                | 1                                           |          | 1     | 1            | 0       | 1     |
| Bahrain                | 0                                           | F        | 0     | 0            | 0       | 0     |
| Bangladesh             | 3                                           |          | 3     | 2            | 0       | 2     |
| Barbados               | 0                                           | F        | 0     | 0            | 0       | 0     |
| Belarus                | 9                                           |          | 9     | 8            | 0       | 9     |
| Belgium                | 1                                           |          | 1     | 1            | 0       | 1     |
| Belize                 | 1                                           | F        | 1     | 1            | 0       | 1     |
| Benin                  | 4                                           |          | 4     | 3            | 0       | 3     |
| Bhutan                 | 0                                           |          | 0     | 2            | 0       | 2     |
| Bolivia                | 53                                          |          | 53    | 52           | 0       | 52    |
| Bosnia and Herzegovina | 2                                           |          | 2     | 2            | 0       | 2     |
| Botswana               | 6                                           |          | 6     | 16           | 0       | 16    |
| Brazil                 | 235                                         | 258      | 494   | 287          | 217     | 504   |
| Brunei Darussalam      | 0                                           | F        | 0     | 0            | 0       | 0     |
| Bulgaria               | 4                                           |          | 4     | 4            | 1       | 4     |
| Burkina Faso           | 6                                           | F        | 6     | 6            | 0       | 6     |
| Burundi                | 1                                           |          | 1     | 0            | 0       | 0     |
| Cape Verde             | 0                                           |          | 0     | 0            | 0       | 0     |
| Cambodia               | 9                                           |          | 9     | 9            | 0       | 9     |
| Cameroon               | 20                                          |          | 20    | 21           | 0       | 21    |
| Canada                 | 226                                         | 121      | 347   | 142          | 205     | 347   |
| Central African Rep.   | 20                                          | F        | 20    | 20           | 2       | 22    |
| Chad                   | 5                                           | F        | 5     | 5            | 0       | 5     |
| Chile                  | 18                                          |          | 18    | 18           | 5       | 18    |
| China                  | 214                                         |          | 214   | 199          | 11      | 210   |
| Colombia               | 28                                          | 31       | 59    | 60           | 0       | 60    |
| Comoros                | 0                                           | F        | 0     | 0            | 0       | 0     |
| Congo                  | 24                                          |          | 24    | 22           | 0       | 22    |
| Cook Islands           | 0                                           | F        | 0     | 0            | 0       | 0     |
| Costa Rica             | 2                                           |          | 2     | 3            | 0       | 3     |
| Cote d'Ivoire          | 3                                           |          | 3     | 2            | 1       | 3     |
| Croatia                | 2                                           |          | 2     | 2            | 0       | 2     |
| Cuba                   | 3                                           |          | 3     | 3            | 0       | 3     |
| Cyprus                 | 0                                           |          | 0     | 0            | 0       | 0     |
| Czech Republic         | 3                                           |          | 3     | 3            | 0       | 3     |
| Dem. Rep. Korea        | 9                                           |          | 9     | 6            | 0       | 6     |
| Dem. Rep. Congo (DRC)  | 152                                         |          | 152   | 45           | 86      | 132   |
| Denmark                | 0                                           |          | 0     | 1            | 0       | 1     |
| Djibouti               | 0                                           | F        | 0     | 0            | 0       | 0     |
| Dominica               | 0                                           |          | 0     | 0            | 0       | 0     |
| Dominican Republic     | 2                                           |          | 2     | 2            | 0       | 2     |
| Ecuador                | 5                                           | 10       | 15    | 13           | 0       | 13    |
| Egypt                  | 0                                           | F        | 0     | 0            | 0       | 0     |
| El Salvador            | 1                                           |          | 1     | 1            | 0       | 1     |
| Equatorial Guinea      | 2                                           |          | 2     | 2            | 0       | 2     |
| Eritrea                | 2                                           |          | 2     | 1            | 0       | 1     |
| Estonia                | 2                                           |          | 2     | 2            | 0       | 2     |
| Ethiopia               | 17                                          |          | 17    | 17           | 0       | 17    |
| Finland                | 22                                          |          | 22    | 22           | 0       | 22    |
| France                 | 24                                          | 1        | 24    | 17           | 0       | 17    |
| Gabon                  | 18                                          |          | 18    | 11           | 13      | 24    |
| Gambia                 | 0                                           | F        | 0     | 0            | 0       | 0     |
| Georgia                | 3                                           |          | 3     | 2            | 1       | 3     |
| Germany                | 11                                          |          | 11    | 11           | 0       | 11    |
| Ghana                  | 9                                           |          | 9     | 7            | 0       | 8     |
| Greece                 | 3                                           | 2        | 3     | 4            | 0       | 4     |
| Grenada                | 0                                           | F        | 0     | 0            | 0       | 0     |
| Guatemala              | 4                                           |          | 4     | 3            | 1       | 4     |
| Guinea                 | 5                                           |          | 5     | 6            | 0       | 6     |
| Guinea Bissau          | 2                                           |          | 2     | 2            | 0       | 2     |
| Guyana                 | 18                                          |          | 18    | 9            | 9       | 18    |
| Haiti                  | 0                                           | F        | 0     | 0            | 0       | 0     |
| Honduras               | 6                                           |          | 6     | 6            | 0       | 6     |
| Hungary                | 2                                           |          | 2     | 2            | 0       | 2     |
| Iceland                | 0                                           |          | 0     | 0            | 0       | 0     |
| India                  | 71                                          |          | 71    | 55           | 16      | 71    |
| Indonesia              | 121                                         |          | 121   | 50           | 45      | 95    |
| Iran                   | 14                                          |          | 14    | 10           | 0       | 11    |
| Iraq                   | 1                                           | F        | 1     | 1            | 0       | 1     |
| Ireland                | 1                                           |          | 1     | 1            | 0       | 1     |
| Israel                 | 0                                           |          | 0     | 0            | 0       | 0     |
| Italy                  | 9                                           |          | 9     | 9            | 0       | 9     |
| Jamaica                | 0                                           |          | 0     | 0            | 0       | 1     |
| Japan                  | 25                                          |          | 25    | 20           | 5       | 25    |
| Jordan                 | 0                                           |          | 0     | 0            | 0       | 0     |
| Kazakhstan             | 19                                          |          | 19    | 3            | 0       | 3     |
| Kenya                  | 5                                           |          | 5     | 4            | 0       | 4     |
| Kiribati               | 0                                           | F        | 0     | 0            | 0       | 0     |
| Kuwait                 | 0                                           |          | 0     | 0            | 0       | 0     |
| Kyrgyzstan             | 1                                           |          | 1     | 1            | 0       | 1     |
| Leo People's Dem. Rep. | 23                                          |          | 23    | 17           | 0       | 17    |
| Latvia                 | 3                                           |          | 3     | 3            | 0       | 3     |
| Lebanon                | 0                                           | F        | 0     | 0            | 0       | 0     |
| Lesotho                | 0                                           | F        | 0     | 0            | 0       | 0     |
| Liberia                | 5                                           |          | 5     | 8            | 0       | 8     |
| Libya                  | 0                                           | F        | 0     | 0            | 0       | 0     |

|                           | Forest area, gap-filled data (Mha, yr 2015) |            |             |              |             |             |
|---------------------------|---------------------------------------------|------------|-------------|--------------|-------------|-------------|
|                           | NGHIs DB                                    |            |             | FAO-FRA 2020 |             |             |
|                           | Managed                                     | Unmanag.   | Total       | Sec.+plant.  | Primary     | Total       |
| Liechtenstein             | 0                                           |            | 0           | 0            | 0           | 0           |
| Lithuania                 | 2                                           |            | 2           | 2            | 0           | 2           |
| Luxembourg                | 0                                           |            | 0           | 0            | 0           | 0           |
| Madagascar                | 9                                           |            | 9           | 10           | 3           | 12          |
| Malawi                    | 9                                           |            | 9           | 9            | 2           | 11          |
| Malaysia                  | 18                                          |            | 18          | 18           | 1           | 19          |
| Maldives                  | 0                                           | F          | 0           | 0            | 0           | 0           |
| Mali                      | 13                                          | F          | 0           | 0            | 13          | 13          |
| Malta                     | 0                                           |            | 0           | 0            | 0           | 0           |
| Marshall Islands          | 0                                           | F          | 0           | 0            | 0           | 0           |
| Mauritania                | 3                                           |            | 3           | 3            | 0           | 3           |
| Mauritius                 | 0                                           |            | 0           | 0            | 0           | 0           |
| Mexico                    | 98                                          |            | 98          | 34           | 32          | 66          |
| Micronesia                | 0                                           | F          | 0           | 0            | 0           | 0           |
| Monaco                    | 0                                           |            | 0           | 0            | 0           | 0           |
| Mongolia                  | 15                                          |            | 15          | 14           | 0           | 14          |
| Montenegro                | 1                                           |            | 1           | 1            | 0           | 1           |
| Morocco                   | 6                                           |            | 6           | 6            | 0           | 6           |
| Mozambique                | 34                                          |            | 34          | 38           | 0           | 38          |
| Myanmar                   | 40                                          |            | 40          | 27           | 3           | 30          |
| Namibia                   | 7                                           |            | 7           | 7            | 0           | 7           |
| Nauru                     | 0                                           | F          | 0           | 0            | 0           | 0           |
| Nepal                     | 6                                           |            | 6           | 5            | 1           | 6           |
| Netherlands               | 0                                           |            | 0           | 0            | 0           | 0           |
| New Zealand               | 10                                          |            | 10          | 8            | 2           | 10          |
| Nicaragua                 | 3                                           |            | 3           | 4            | 0           | 4           |
| Niger                     | 8                                           |            | 8           | 1            | 0           | 1           |
| Nigeria                   | 14                                          |            | 14          | 22           | 0           | 22          |
| Niue                      | 0                                           | F          | 0           | 0            | 0           | 0           |
| Norway                    | 12                                          |            | 12          | 12           | 0           | 12          |
| Oman                      | 0                                           | F          | 0           | 0            | 0           | 0           |
| Pakistan                  | 5                                           |            | 5           | 4            | 0           | 4           |
| Palau                     | 0                                           | F          | 0           | 0            | 0           | 0           |
| Panama                    | 4                                           |            | 4           | 4            | 0           | 4           |
| Papua New Guinea          | 36                                          |            | 36          | 8            | 0           | 8           |
| Paraguay                  | 7                                           |            | 7           | 17           | 0           | 17          |
| Peru                      | 18                                          | 56         | 74          | 73           | 0           | 73          |
| Philippines               | 7                                           |            | 7           | 7            | 0           | 7           |
| Poland                    | 9                                           |            | 9           | 9            | 0           | 9           |
| Portugal                  | 4                                           |            | 4           | 3            | 0           | 3           |
| Qatar                     | 0                                           | F          | 0           | 0            | 0           | 0           |
| Republic of Korea         | 6                                           |            | 6           | 6            | 0           | 6           |
| Republic of Moldova       | 0                                           |            | 0           | 0            | 0           | 0           |
| Romania                   | 7                                           |            | 7           | 0            | 0           | 0           |
| Russian Federation        | 687                                         | 211        | 898         | 551          | 284         | 815         |
| Rwanda                    | 0                                           |            | 0           | 0            | 0           | 0           |
| Saint Kitts and Nevis     | 0                                           | F          | 0           | 0            | 0           | 0           |
| Saint Lucia               | 0                                           |            | 0           | 0            | 0           | 0           |
| Saint Vincent and Grenad. | 0                                           | F          | 0           | 0            | 0           | 0           |
| Samoa                     | 0                                           | F          | 0           | 0            | 0           | 0           |
| San Marino                | 0                                           |            | 0           | 0            | 0           | 0           |
| Sao Tome and Principe     | 0                                           | F          | 0           | 0            | 0           | 0           |
| Saudi Arabia              | 1                                           | F          | 1           | 1            | 0           | 1           |
| Senegal                   | 14                                          |            | 14          | 6            | 2           | 8           |
| Serbia                    | 2                                           |            | 2           | 3            | 0           | 3           |
| Seychelles                | 0                                           | F          | 0           | 0            | 0           | 0           |
| Sierra Leone              | 3                                           | F          | 3           | 3            | 0           | 3           |
| Singapore                 | 0                                           |            | 0           | 0            | 0           | 0           |
| Slovakia                  | 2                                           |            | 2           | 2            | 0           | 2           |
| Slovenia                  | 1                                           |            | 1           | 1            | 0           | 1           |
| Solomon Islands           | 3                                           |            | 3           | 1            | 2           | 3           |
| Somalia                   | 6                                           | F          | 6           | 6            | 0           | 6           |
| South Africa              | 23                                          |            | 23          | 17           | 0           | 17          |
| South Sudan               | 7                                           | F          | 7           | 7            | 0           | 7           |
| Spain                     | 16                                          |            | 16          | 19           | 0           | 19          |
| Sri Lanka                 | 2                                           |            | 2           | 2            | 0           | 2           |
| Sudan                     | 70                                          |            | 70          | 18           | 1           | 19          |
| Suriname                  | 15                                          |            | 15          | 0            | 15          | 15          |
| Swaziland                 | 0                                           | F          | 0           | 0            | 0           | 0           |
| Sweden                    | 28                                          |            | 28          | 26           | 2           | 28          |
| Switzerland               | 1                                           |            | 1           | 1            | 0           | 1           |
| Syrian Arab Republic      | 1                                           | F          | 1           | 1            | 0           | 1           |
| Tajikistan                | 0                                           |            | 0           | 0            | 0           | 0           |
| Thailand                  | 17                                          |            | 17          | 20           | 0           | 20          |
| Macedonia                 | 0                                           | F          | 0           | 0            | 0           | 0           |
| Timor-Leste               | 1                                           |            | 1           | 1            | 0           | 1           |
| Togo                      | 1                                           |            | 1           | 1            | 0           | 1           |
| Tonga                     | 0                                           | F          | 0           | 0            | 0           | 0           |
| Trinidad and Tobago       | 0                                           | F          | 0           | 0            | 0           | 0           |
| Tunisia                   | 1                                           | F          | 1           | 1            | 0           | 1           |
| Turkey                    | 23                                          |            | 23          | 22           | 0           | 22          |
| Turkmenistan              | 4                                           |            | 4           | 4            | 0           | 4           |
| Tuvalu                    | 0                                           | F          | 0           | 0            | 0           | 0           |
| Uganda                    | 3                                           | F          | 3           | 3            | 0           | 3           |
| Ukraine                   | 11                                          |            | 11          | 10           | 0           | 10          |
| United Arab Emirates      | 1                                           |            | 1           | 0            | 0           | 0           |
| United Kingdom            | 4                                           |            | 4           | 3            | 0           | 3           |
| United Rep. of Tanzania   | 48                                          |            | 48          | 20           | 29          | 48          |
| USA                       | 280                                         | 8          | 288         | 235          | 75          | 310         |
| Uruguay                   | 2                                           |            | 2           | 2            | 0           | 2           |
| Uzbekistan                | 3                                           |            | 3           | 3            | 0           | 4           |
| Vanuatu                   | 0                                           |            | 0           | 1            | 0           | 0           |
| Venezuela                 | 47                                          |            | 47          | 1            | 45          | 47          |
| Viet Nam                  | 15                                          |            | 15          | 14           | 0           | 14          |
| Yemen                     | 2                                           |            | 2           | 1            | 0           | 1           |
| Zambia                    | 48                                          |            | 48          | 46           | 0           | 46          |
| Zimbabwe                  | 16                                          |            | 16          | 18           | 0           | 18          |
| <b>World</b>              | <b>3589</b>                                 | <b>699</b> | <b>4275</b> | <b>2910</b>  | <b>1134</b> | <b>4044</b> |
| <b>Annex I</b>            | <b>1599</b>                                 | <b>344</b> | <b>1943</b> | <b>1299</b>  | <b>560</b>  | <b>1858</b> |
| <b>Non Annex I</b>        | <b>1990</b>                                 | <b>356</b> | <b>2332</b> | <b>1611</b>  | <b>575</b>  | <b>2186</b> |

**Supplementary table 4.** Net LULUCF CO<sub>2</sub> flux from the original country documents selected in our NGHGI DB, not gap-filled. The sources are indicated in Suppl. Table 1.

|                        | LULUCF, original not gap-filled data, Mt CO2/yr |      |      |      |      |      |      |      |      |      |       |      |      |      |       |      |      |      |      |      |      |
|------------------------|-------------------------------------------------|------|------|------|------|------|------|------|------|------|-------|------|------|------|-------|------|------|------|------|------|------|
|                        | 2000                                            | 2001 | 2002 | 2003 | 2004 | 2005 | 2006 | 2007 | 2008 | 2009 | 2010  | 2011 | 2012 | 2013 | 2014  | 2015 | 2016 | 2017 | 2018 | 2019 | 2020 |
| Afghanistan            |                                                 |      |      |      |      | 9    |      |      |      |      |       |      |      |      |       |      |      |      |      |      |      |
| Albania                | 4                                               | 4    | 3    | 3    | 3    | 3    | 3    | 3    | 3    | 2    |       |      |      |      |       |      |      |      |      |      |      |
| Algeria                | -8                                              |      |      |      |      |      |      |      |      |      |       |      |      |      |       |      |      |      |      |      |      |
| Andorra                | 0                                               |      |      |      |      | 0    |      |      |      |      |       |      |      |      |       |      |      |      | 0    |      | 0    |
| Angola                 |                                                 |      |      |      |      | 40   | 40   | 40   | 40   | 40   | 40    | 71   | 70   | 70   | 70    | 70   | 70   | 70   | 70   |      |      |
| Antigua and Barbuda    |                                                 |      |      |      |      |      |      |      |      |      |       |      |      |      |       |      |      |      |      |      |      |
| Argentina              | 85                                              | 83   | 97   | 99   | 105  | 94   | 110  | 115  | 91   | 68   | 69    | 57   | 93   | 89   | 62    | 40   | 31   | 41   | 39   |      |      |
| Armenia                | -2                                              | -2   | -2   | -2   | -2   | -2   | -2   | -2   | -2   | -2   | -2    | -2   | -2   | -2   | -2    | -2   | -2   | -2   | -2   | -2   | -2   |
| Australia              | 32                                              | 56   | 46   | 58   | 44   | 67   | 63   | 75   | 59   | 56   | 43    | 13   | 0    | -3   | -10   | -19  | -42  | -53  | -40  | -43  |      |
| Austria                | -17                                             | -20  | -15  | -5   | -10  | -11  | -5   | -5   | -4   | -4   | -6    | -6   | -6   | -5   | -4    | -4   | -4   | -5   | -5   | -5   |      |
| Azerbaijan             | -3                                              | -3   | -3   | -3   | -3   | -3   | -3   | -3   | -3   | -3   | -3    | -3   | -3   | -3   |       |      |      |      |      |      |      |
| Bahamas                | -4                                              |      |      |      |      |      |      |      |      |      |       |      |      |      |       |      |      |      |      |      |      |
| Bahrain                |                                                 |      |      |      |      | 0    |      |      |      |      | 0     | 0    | 0    | 0    | 0     | 0    |      |      |      |      |      |
| Bangladesh             | 0                                               | 0    | 0    | 0    | 0    | 0    | 0    | 0    | 0    | 0    | 0     | 0    | 0    | 0    | 0     | 0    |      |      |      |      |      |
| Barbados               | 0                                               | 0    | 0    | 0    | 0    | 0    | 0    | 0    | 0    | 0    | 0     |      |      |      |       |      |      |      |      |      |      |
| Belarus                | -41                                             | -40  | -38  | -36  | -38  | -40  | -42  | -45  | -45  | -48  | -50   | -49  | -47  | -49  | -47   | -45  | -41  | -37  | -39  | -32  |      |
| Belgium                | -2                                              | -2   | -2   | -2   | -2   | -2   | -2   | -2   | -2   | -2   | -1    | -1   | -1   | -2   | -2    | -2   | -2   | -2   | -1   | -1   |      |
| Belize                 | -8                                              |      |      | -12  |      |      | -11  |      |      | -10  |       |      |      | -8   |       | -6   |      | -7   |      |      |      |
| Benin                  | -3                                              |      |      |      |      | -1   |      |      |      |      | -5    | -4   | -4   | -4   | -4    | -4   |      |      |      |      |      |
| Bhutan                 | -7                                              | -8   | -8   | -9   | -9   | -8   | -8   | -6   | -8   | -9   | -8    | -8   | -8   | -8   | -6    | -8   |      |      |      |      |      |
| Bolivia                |                                                 |      |      |      |      |      | 41   |      |      | 36   |       |      |      |      |       |      |      |      |      |      |      |
| Bosnia and Herzegovina |                                                 | -7   | -5   | -5   | -7   | -7   | -7   | -8   | -7   | -8   | -6    | -6   | -8   | -6   | -6    |      |      |      |      |      |      |
| Botswana               |                                                 |      |      |      |      |      |      |      |      |      |       |      |      |      |       | -3   |      |      |      |      |      |
| Brazil                 | 1110                                            | 1058 | 1257 | 2297 | 2482 | 1480 | 1134 | 794  | 899  | 284  | 220   | 300  | 155  | 354  | 214   | 335  | 365  |      |      |      |      |
| Brunei Darussalam      |                                                 |      |      |      |      |      |      |      |      |      | -3    | -3   | -3   | -3   | -3    |      |      |      |      |      |      |
| Bulgaria               | -18                                             | -15  | -15  | -14  | -15  | -17  | -14  | -15  | -13  | -14  | -13   | -10  | -10  | -9   | -10   | -10  | -10  | -10  | -10  | -10  |      |
| Burkina Faso           |                                                 |      |      |      |      |      |      | 34   | 34   | 37   | 37    | 37   | 38   | 38   | 38    | 44   | 44   | 44   |      |      |      |
| Burundi                |                                                 |      |      |      |      | -4   |      |      |      |      | -1    |      |      |      |       | -1   |      |      |      |      |      |
| Cape Verde             | 0                                               |      |      |      |      | 0    |      |      |      |      | 0     |      |      |      |       |      |      |      |      |      |      |
| Cambodia               |                                                 |      |      |      |      |      |      |      |      |      | 71    | 71   | 71   | 71   | 56    | 56   | 40   | 40   |      |      |      |
| Cameroon               | -77                                             |      |      |      |      |      |      |      |      |      |       |      |      |      |       |      |      |      |      |      |      |
| Canada                 | -23                                             | -39  | -22  | -26  | 2    | 7    | -5   | -9   | -14  | -25  | -8    | -8   | -11  | -5   | -5    | 3    | -1   | 0    | 7    | 9    |      |
| Central African Rep.   |                                                 |      |      |      |      |      |      |      |      |      | -229  |      |      |      |       |      |      |      |      |      |      |
| Chad                   |                                                 |      |      |      |      |      |      |      |      |      | -5    |      |      |      |       |      |      |      |      |      |      |
| Chile                  | -73                                             | -75  | -62  | -78  | -73  | -73  | -77  | -63  | -64  | -67  | -77   | -76  | -68  | -78  | -66   | -57  | -75  | -12  | -68  |      | -1   |
| China                  |                                                 |      |      |      |      | -803 |      |      |      |      | -1030 |      | -576 |      | -1151 |      |      |      |      |      |      |
| Colombia               | 98                                              | 78   | 78   | 89   | 89   | 88   | 75   | 81   | 75   | 68   | 69    | 73   | 71   | 60   |       |      |      |      |      |      |      |
| Comoros                | -2                                              |      |      |      |      | -2   |      |      |      |      |       |      |      |      |       |      |      |      |      |      |      |
| Congo                  | -15                                             |      |      |      |      |      |      |      |      |      |       |      |      |      |       | -2   |      | -22  |      |      | -2   |
| Cook Islands           |                                                 |      |      |      |      |      | 0    |      |      |      |       |      |      |      |       | -19  |      |      |      |      | -21  |
| Costa Rica             | 19                                              | 5    | 5    | 4    | 5    | 5    | 5    | 6    | 2    | 2    | 2     | 2    | 5    | 5    | -1    | 0    | -1   | -3   |      |      |      |
| Cote d'Ivoire          | 41                                              | 40   | 38   | 37   | 35   | 34   | 32   | 31   | 29   | 28   | 26    | 25   | 24   | 22   | 21    | 21   |      |      |      |      |      |
| Croatia                | -7                                              | -8   | -8   | -7   | -8   | -8   | -8   | -7   | -7   | -7   | -7    | -6   | -6   | -6   | -6    | -6   | -6   | -5   | -6   | -6   |      |
| Cuba                   | 18                                              |      |      |      |      |      |      |      |      |      | -24   |      | -24  |      | -26   |      |      | -27  | -27  | -27  |      |
| Cyprus                 | 0                                               | 0    | 0    | 0    | 0    | 0    | 0    | 0    | 0    | 0    | 0     | 0    | 0    | 0    | 0     | 0    | 0    | 0    | 0    | 0    |      |
| Czech Republic         | -9                                              | -9   | -9   | -8   | -8   | -8   | -6   | -5   | -8   | -8   | -8    | -9   | -9   | -8   | -8    | -7   | -6   | -4   | 4    | 14   |      |
| Dem. Rep. Korea        | -17                                             |      | -17  |      |      |      |      |      |      |      |       |      |      |      |       |      |      |      |      |      |      |
| Dem. Rep. Congo (DRC)  | 484                                             | 484  | 484  | 484  | 484  | 484  | 484  | 484  | 484  | 484  | 484   | 831  | 831  | 831  | 831   | 529  | 529  | 529  | 529  |      |      |
| Denmark                | 4                                               | 3    | 4    | 4    | 4    | 4    | 5    | 5    | 4    | 3    | 2     | 1    | 1    | 1    | 1     | 0    | 1    | 1    | 3    | 2    |      |
| Djibouti               | -2                                              |      |      |      |      |      |      |      |      |      |       |      |      |      |       |      |      |      |      |      |      |
| Dominica               | 0                                               | 0    | 0    | 0    | 0    | 0    |      |      |      |      |       |      |      |      |       |      |      | -3   |      |      |      |
| Dominican Republic     |                                                 |      |      |      |      |      |      | 2    | 2    | 2    | 2     | 2    | 2    | 2    | 2     | 2    |      |      |      |      |      |
| Ecuador                | 41                                              |      |      |      |      |      | 34   |      |      |      | 24    |      | 20   |      |       |      |      |      |      |      |      |
| Egypt                  |                                                 |      |      |      |      |      |      |      |      |      |       |      |      |      |       |      |      |      |      |      |      |
| El Salvador            |                                                 | 2    | 2    | 2    | 2    | 2    | 2    | 2    | 2    | 2    | 2     | 0    | 0    | 0    | 0     | 0    | 0    | 0    | 0    | 0    |      |
| Equatorial Guinea      |                                                 |      |      |      |      | 9    | 9    | 9    | 9    | 9    | 9     | 9    | 9    | 9    | 9     |      |      |      |      |      |      |
| Eritrea                | 0                                               |      |      |      |      | 0    |      |      |      |      | 0     |      |      |      |       | 0    |      |      |      |      |      |
| Estonia                | -4                                              | -4   | -4   | -5   | -4   | -2   | -3   | -3   | -4   | -4   | -5    | -5   | -4   | -4   | -2    | -3   | -3   | -2   | -1   | -1   |      |
| Ethiopia               | 103                                             | 118  | 109  | 112  | 62   | 61   | 62   | 62   | 77   | 72   | 77    | 102  | 30   | 33   |       |      |      |      |      |      |      |
| Fiji                   |                                                 |      |      |      |      | 0    | 0    | 0    | 1    | 0    | 1     | 1    |      |      |       |      |      |      |      |      |      |
| Finland                | -19                                             | -20  | -21  | -22  | -23  | -24  | -29  | -20  | -24  | -36  | -24   | -24  | -27  | -20  | -23   | -21  | -20  | -18  | -11  | -17  |      |
| France                 | -22                                             | -34  | -42  | -45  | -48  | -49  | -50  | -50  | -50  | -39  | -40   | -40  | -42  | -45  | -39   | -35  | -38  | -36  | -35  | -35  |      |
| Gabon                  | -98                                             |      |      |      |      | -105 |      |      |      |      | -121  | -117 | -118 | -115 | -114  | -115 | -113 | -109 | -109 |      |      |
| Gambia                 |                                                 |      |      |      |      |      |      |      |      |      | 1     |      |      |      |       |      |      |      |      |      |      |
| Georgia                | -5                                              | -5   | -5   | -4   | -4   | -4   | -4   | -4   | -4   | -5   | -5    | -5   | -5   | -5   | -5    | -5   | -5   | -5   |      |      |      |
| Germany                | -23                                             | -27  | 1    | 0    | -2   | -3   | -6   | -2   | -13  | -20  | -13   | -12  | -21  | -21  | -24   | -23  | -23  | -24  | -22  | -20  |      |
| Ghana                  | 13                                              | 13   | 14   | 13   | 13   | 13   | 13   | 13   | 13   | 13   | 13    | 13   | 13   | 13   | 13    | 13   | 13   | 13   |      |      |      |
| Greece                 | -2                                              | -2   | -3   | -3   | -2   | -3   | -3   | -2   | -3   | -3   | -3    | -3   | -3   | -3   | -2    | 0    | -4   | -3   | -4   | -4   |      |
| Grenada                | 0                                               | 0    | 0    | 0    | 1    | 1    | 0    | 0    | 0    | 0    | 0     |      |      |      |       |      |      |      |      |      |      |
| Guatemala              | 17                                              | 17   | 17   | 17   | 17   | 17   | 17   | 17   | 17   | 17   | 17    | 17   | 17   | 17   | 17    | 17   | 17   | 17   | 17   | 17   | 17   |
| Guinea                 |                                                 |      |      |      |      |      |      |      |      |      |       |      |      |      |       | 34   | 34   | 34   | 34   | 34   | 34   |
| Guinea Bissau          |                                                 |      |      |      |      |      |      |      |      |      |       |      |      |      | -1    |      |      |      |      |      |      |
| Guyana                 | 1                                               |      | 46   | 46   | 46   | 46   | 46   | 46   | 46   | 46   | 46    | 46   | 46   |      |       |      |      |      |      |      |      |
| Haiti                  |                                                 |      |      |      |      |      |      |      |      |      |       |      |      |      |       |      |      |      |      |      |      |
| Honduras               |                                                 |      |      |      |      |      |      |      |      |      |       |      |      |      |       |      |      |      |      |      |      |
| Hungary                | -1                                              | -3   | -2   | -4   | -4   | -6   | -4   | -4   | -6   | -4   | -5    | -4   | -5   | -4   | -5    | -6   | -5   | -5   | -5   | -6   |      |
| Iceland                | 6                                               | 6    | 6    | 6    | 6    | 6    | 6    | 6    | 6    | 6    | 6     | 6    | 6    | 6    | 6     | 6    | 6    | 6    | 6    | 6    |      |
| India                  |                                                 |      |      |      |      |      |      |      |      |      |       |      |      |      |       |      |      |      |      |      |      |
| Indonesia              | 532                                             | -48  | 174  | -25  | 350  | 400  | 1145 | 300  | 229  | 607  | 160   | 258  | 647  | 503  | 365   | 862  | 1566 |      |      |      |      |
| Iran                   |                                                 |      |      |      |      |      |      |      |      |      | 22    |      |      |      |       |      |      |      |      |      |      |
| Ireland                | 5                                               | 6    | 6    | 6    | 5    | 5    | 6    | 5    | 4    | 4    | 5     | 5    | 4    | 4    | 5     | 5    | 4    | 5    | 4    | 4    | 4    |
| Israel                 | 0                                               |      |      | 0    | 0    | 0    | 0    | 0    | 0    | 0    | 0     | 0    | 0    | 0    | 0     | 0    | 0    | 0    | 0    | 0    |      |
| Italy                  | -22                                             | -32  | -37  | -29  | -35  | -36  | -37  | -15  | -32  | -37  | -43   | -35  | -27  | -41  | -42   | -44  | -41  | -22  | -37  | -42  |      |
| Jamaica                |                                                 |      |      |      |      |      | -2   | -2   | -2   | -2   | -2    | -2   | -2   | -2   |       |      |      |      |      |      |      |
| Japan                  | -85                                             | -86  | -87  | -98  | -95  | -89  | -84  | -80  | -69  | -66  | -70   | -68  | -70  | -63  | -61   | -57  | -53  | -57  | -56  | -50  |      |
| Jordan                 |                                                 |      |      |      |      |      |      |      |      |      |       |      |      |      |       |      |      |      |      |      |      |
| Kazakhstan             | 95                                              | 77   | 58   | 39   | 24   | 6    | -7   | -7   | -7   | -8   | -10   | -11  | -12  | -12  | -7    | -2   | 2    | 7    | 12   | 10   |      |
| Kenya                  |                                                 |      | 63   | 63   | 63   | 63   | 38   | 38   | 38   | 38   | 50    | 50   | 50   | 50   | 57    | 57   | 57   | 57   |      |      |      |
| Kiribati               |                                                 |      |      |      |      |      |      |      |      |      |       |      |      |      |       |      |      |      |      |      |      |
| Kuwait                 |                                                 |      |      |      |      |      |      |      |      |      |       |      |      |      |       |      |      |      |      |      |      |
| Kyrgyzstan             |                                                 |      |      |      |      |      |      |      |      |      |       |      |      |      |       |      |      |      |      |      |      |
| Kyrgyzstan             | -10                                             | -10  | -10  | -10  | -10  | -10  | -10  | -10  | -10  | -10  | -10   | -10  | -10  | -10  | -10   | -10  | -10  | -10  | -10  |      |      |
| Lao People's Dem. Rep. | 45                                              |      |      |      |      | 33   | 33   | 33   | 33   | 33   | 33    | 33   | 33   | 33   | 33    | 33   | 26   |      |      |      |      |
| Latvia                 | -13                                             | -13  | -12  | -11  | -7   | -7   | -8   | -7   | -8   | -5   | -3    | -3   | -5   | -4   | 0     | -1   | -3   | -4   | -2   | -3   |      |
| Lebanon                | -2                                              | -3   | -3   | -2   | -3   | -2   | -2   | -2   | -2   | -2   | -2    | -2   | -2   | -2   | -2    | -2   | -3   | -3   | -3   |      |      |
| Lesotho                |                                                 |      |      |      |      | 8    | 8    | 8    | 7    | 7    | 7     |      |      |      |       |      |      |      |      |      |      |
| Liberia                |                                                 |      |      |      |      |      |      |      |      |      |       |      |      |      |       |      |      |      |      |      |      |
| Libya                  |                                                 |      |      |      |      |      |      |      |      |      |       |      |      |      |       | -21  |      |      |      |      |      |

Supplementary table 4 (continues)

|                           | LULUCF, original not gap-filled data, Mt CO2/yr |      |      |      |      |      |      |      |      |      |      |      |      |      |      |      |      |      |      |      |      |
|---------------------------|-------------------------------------------------|------|------|------|------|------|------|------|------|------|------|------|------|------|------|------|------|------|------|------|------|
|                           | 2000                                            | 2001 | 2002 | 2003 | 2004 | 2005 | 2006 | 2007 | 2008 | 2009 | 2010 | 2011 | 2012 | 2013 | 2014 | 2015 | 2016 | 2017 | 2018 | 2019 | 2020 |
| Liechtenstein             | 0                                               | 0    | 0    | 0    | 0    | 0    | 0    | 0    | 0    | 0    | 0    | 0    | 0    | 0    | 0    | 0    | 0    | 0    | 0    | 0    | 0    |
| Lithuania                 | -10                                             | -7   | -6   | -6   | -5   | -4   | -4   | -6   | -7   | -8   | -11  | -11  | -10  | -10  | -9   | -8   | -7   | -7   | -7   | -6   |      |
| Luxembourg                | -1                                              | -1   | -1   | -1   | -1   | -1   | -1   | 0    | 0    | 0    | 0    | 0    | 0    | 0    | 0    | 0    | -1   | 0    | 0    | 0    |      |
| Madagascar                |                                                 |      |      |      |      |      | 34   | 34   | 34   | 34   | 34   | 34   | 34   | 34   | 34   | 34   |      |      |      |      |      |
| Malawi                    |                                                 |      |      |      |      |      |      |      |      |      | -1   |      |      |      |      |      |      |      |      |      |      |
| Malaysia                  | -182                                            |      |      |      |      | -199 |      |      |      |      |      | -241 |      |      | -265 |      | -242 |      |      |      |      |
| Maldives                  |                                                 |      |      |      |      |      |      |      |      |      |      |      |      |      |      |      |      |      |      |      |      |
| Mali                      | -259                                            |      |      |      |      |      |      | -259 | -255 | -213 | -245 | -272 | -241 | -259 | -155 |      |      |      |      |      |      |
| Malta                     | 0                                               | 0    | 0    | 0    | 0    | 0    | 0    | 0    | 0    | 0    | 0    | 0    | 0    | 0    | 0    | 0    | 0    | 0    | 0    | 0    | 0    |
| Marshall Islands          | 0                                               | 0    | 0    | 0    | 0    | 0    | 0    | 0    | 0    | 0    | 0    | 0    | 0    | 0    | 0    | 0    | 0    | 0    | 0    | 0    | 0    |
| Mauritania                | -1                                              | -1   | -1   | -1   | -1   | -1   | -1   | -1   | -1   | -1   | -1   | -1   | -1   | -1   | -1   | -1   | -1   | -1   | -1   | -1   |      |
| Mauritius                 | 0                                               | 0    | 0    | 0    | 0    | 0    | 0    | 0    |      |      |      |      |      |      |      |      |      |      |      |      |      |
| Mexico                    |                                                 |      |      |      |      | -151 |      |      |      |      | -147 |      |      |      |      | -148 |      |      |      |      |      |
| Micronesia                |                                                 |      |      |      |      |      |      |      |      |      | -1   |      |      |      |      |      |      |      |      |      |      |
| Monaco                    | 0                                               | 0    | 0    | 0    | 0    | 0    | 0    | 0    | 0    | 0    | 0    | 0    | 0    | 0    | 0    | 0    | 0    | 0    | 0    | 0    | 0    |
| Mongolia                  | -25                                             | -26  | -26  | -25  | -26  | -26  | -25  | -25  | -25  | -25  | -25  | -25  | -25  | -25  | -25  | -25  | -2   | -2   | -2   | -3   |      |
| Montenegro                | -2                                              | -3   | -3   | -3   | -3   | -2   | -2   | -2   | -2   | -3   | -3   | -1   | -2   | -2   | -2   | -3   | -2   | -2   | -2   | -2   | -3   |
| Morocco                   | -2                                              | -2   | -2   |      |      |      |      |      |      |      |      |      |      |      |      |      |      |      |      |      |      |
| Mozambique                |                                                 |      |      | 39   | 39   | 39   | 39   | 39   | 39   | 39   | 39   | 39   | 39   | 39   | 39   | 39   |      |      |      |      |      |
| Myanmar                   |                                                 |      |      |      |      | 52   | 52   | 51   | 51   | 51   | 50   | 50   | 50   | 49   | 49   | 49   |      |      |      |      |      |
| Namibia                   | -100                                            | -100 | -104 | -105 | -107 | -104 | -101 | -98  | -107 | -95  | -99  | -96  | -95  | -113 | -110 | -112 | -117 |      |      |      |      |
| Nauru                     |                                                 |      |      |      |      |      |      |      |      |      |      |      |      |      |      |      |      |      |      |      |      |
| Nepal                     |                                                 |      |      |      |      |      |      |      |      |      |      | -16  |      |      |      |      |      |      |      |      |      |
| Netherlands               | 5                                               | 5    | 5    | 5    | 5    | 5    | 5    | 5    | 5    | 5    | 5    | 5    | 5    | 5    | 5    | 5    | 5    | 5    | 5    | 5    | 4    |
| New Zealand               | -27                                             | -27  | -25  | -26  | -26  | -26  | -24  | -23  | -30  | -29  | -30  | -26  | -25  | -24  | -26  | -27  | -26  | -26  | -27  | -28  |      |
| Nicaragua                 |                                                 |      |      |      |      |      | 17   | 16   | 16   | 15   | 15   | 14   | 14   | 13   | 13   | 12   |      |      |      |      |      |
| Niger                     | -35                                             |      |      |      |      |      |      |      | -35  |      |      |      |      |      |      |      |      |      |      |      |      |
| Nigeria                   | 251                                             | 254  | 257  | 261  | 265  | 269  | 272  | 276  | 278  | 283  | 287  | 290  | 295  | 298  | 303  | 308  | 311  | 315  |      |      |      |
| Niue                      |                                                 |      |      |      |      |      |      |      |      | 0    |      |      |      |      |      |      |      |      |      |      |      |
| Norway                    | -20                                             | -22  | -23  | -25  | -24  | -21  | -23  | -24  | -25  | -28  | -25  | -26  | -22  | -23  | -19  | -15  | -15  | -16  | -17  | -19  |      |
| Oman                      |                                                 |      |      |      |      |      |      |      |      |      |      |      |      |      |      |      |      |      |      |      |      |
| Pakistan                  | 3                                               | 3    | 3    | 3    | 3    | 3    | 3    | 3    | 3    | 3    | 3    | 3    | 3    | 3    | 3    | 3    | 3    | 3    | 3    | 3    | 3    |
| Palau                     | 0                                               | 0    | 0    | 0    | 0    | 0    | 0    | 0    | 0    | 0    | 0    | 0    | 0    | 0    | 0    | 0    | 0    | 0    | 0    | 0    | 0    |
| Panama                    | -10                                             | -10  | -10  | -10  | -10  | -10  | -10  | -22  | -18  | -15  | -26  | -22  | -20  | -25  | -25  | -22  |      |      |      |      |      |
| Papua New Guinea          | -22                                             | -22  | -13  | -14  | -11  | -18  | -13  | -10  | -9   | -5   | 0    | 2    | -2   | 4    | 1    | 2    |      |      |      |      |      |
| Paraguay                  | 36                                              | 31   | 30   | 30   | 30   | 32   | 37   | 38   | 42   | 35   | 35   | 35   | 47   | 46   | 17   | 16   |      |      |      |      |      |
| Peru                      | 107                                             |      |      |      |      | 121  |      |      |      |      | 90   |      |      | 87   |      | 76   |      |      |      |      |      |
| Philippines               | -105                                            |      |      |      |      |      |      |      |      |      |      |      |      |      |      |      |      |      |      |      |      |
| Poland                    | -38                                             | -30  | -39  | -41  | -52  | -51  | -45  | -39  | -38  | -37  | -35  | -42  | -41  | -43  | -35  | -31  | -33  | -37  | -38  | -17  |      |
| Portugal                  | -6                                              | -9   | -9   | 2    | -8   | 1    | -9   | -13  | -14  | -14  | -10  | -11  | -9   | -8   | -10  | -9   | -5   | 8    | -7   | -8   |      |
| Qatar                     |                                                 |      |      |      |      |      |      |      |      |      |      |      |      |      |      |      |      |      |      |      |      |
| Republic of Korea         | -60                                             | -59  | -57  | -56  | -57  | -55  | -56  | -57  | -58  | -57  | -55  | -55  | -49  | -45  | -43  | -43  | -45  | -45  | -45  |      |      |
| Republic of Moldova       | 1                                               | 1    | 1    | 2    | 2    | 2    | 1    | -1   | 2    | 1    | 2    | 2    | 2    | 2    | 2    | 2    |      |      |      |      |      |
| Romania                   | -30                                             | -31  | -29  | -29  | -29  | -30  | -30  | -29  | -30  | -31  | -29  | -33  | -33  | -33  | -33  | -33  | -31  | -29  | -33  |      |      |
| Russian Federation        | -508                                            | -568 | -598 | -603 | -573 | -570 | -582 | -595 | -640 | -693 | -749 | -690 | -713 | -647 | -707 | -628 | -646 | -643 | -636 | -576 |      |
| Rwanda                    |                                                 |      |      |      |      | -6   | -5   | -6   | -6   | -6   | -6   | -6   | -6   | -6   | -7   | -7   | -7   | -7   | -7   |      |      |
| Saint Kitts and Nevis     |                                                 |      |      |      |      |      |      |      | 0    |      |      |      |      |      |      |      |      |      |      |      |      |
| Saint Lucia               |                                                 | 0    | 0    | 0    | 0    | 0    | 0    | 0    | 0    | 0    | 0    | 0    | 0    | 0    | 0    | 0    | 0    | 0    | 0    | 0    | 0    |
| Saint Vincent and Grenad. | 0                                               | 0    | 0    | 0    | 0    | 0    | 0    | 0    | 0    | 0    | 0    | 0    | 0    | 0    | 0    | 0    | 0    | 0    | 0    | 0    | 0    |
| Samoa                     | -1                                              |      |      |      |      |      |      | -1   |      |      |      |      |      |      |      |      |      |      |      |      |      |
| San Marino                |                                                 |      |      |      |      |      |      |      | 0    |      | 0    |      |      |      |      |      |      |      |      |      |      |
| Sao Tome and Principe     |                                                 |      |      |      |      | 0    |      |      |      |      |      |      |      | 0    |      |      |      |      |      |      |      |
| Saudi Arabia              | -6                                              |      |      |      |      |      |      |      |      |      | -9   |      | -9   |      |      |      |      |      |      |      |      |
| Senegal                   |                                                 |      |      |      |      |      |      |      |      |      | -13  |      |      |      |      | -12  |      |      |      |      |      |
| Serbia                    | -14                                             |      |      |      |      | -11  |      |      |      |      | -17  | -17  | -15  | -16  | -18  |      |      |      |      |      |      |
| Seychelles                | -1                                              |      |      |      |      |      |      |      |      |      |      |      |      |      |      |      |      |      |      |      |      |
| Sierra Leone              |                                                 |      |      |      |      |      |      |      |      |      |      |      |      |      |      |      |      |      |      |      |      |
| Singapore                 |                                                 |      |      |      |      |      |      |      |      |      |      |      |      | 0    |      |      |      |      |      |      |      |
| Slovakia                  | -10                                             | -9   | -10  | -9   | -9   | -6   | -9   | -8   | -7   | -7   | -6   | -7   | -8   | -8   | -6   | -7   | -7   | -7   | -6   | -6   |      |
| Slovenia                  | -6                                              | -6   | -8   | -7   | -7   | -7   | -7   | -8   | -8   | -7   | -7   | -7   | -7   | -7   | -6   | 0    | 1    | 1    | 1    | 1    | 0    |
| Solomon Islands           |                                                 | 2    | 3    | 2    | 3    | 6    | 5    | 6    | 7    | 6    | 7    | 7    | 9    | 9    | 13   | 14   | 15   | 16   |      |      |      |
| Somalia                   | -9                                              | -4   | -5   | -5   | 7    | 8    | 10   | 8    | 8    | 10   | 14   | 19   | 19   | 31   | 37   |      |      |      |      |      |      |
| South Africa              | -12                                             | -6   | -12  | -18  | -13  | 0    | -3   | -6   | 0    | -14  | -11  | -11  | -11  | -19  | -17  | -23  | -33  | -31  | -31  |      |      |
| South Sudan               | 0                                               |      |      |      |      | 0    |      |      |      |      | 0    |      |      |      |      | 0    |      |      |      |      |      |
| Spain                     | -40                                             | -41  | -40  | -39  | -39  | -39  | -41  | -39  | -38  | -36  | -38  | -38  | -36  | -35  | -37  | -39  | -39  | -39  | -39  | -38  |      |
| Sri Lanka                 | 4                                               | 4    | 4    | 4    | 4    | 4    | 4    | 4    | 4    | 4    | 4    | 4    | 4    | 4    | 4    | 4    | 4    | 4    | 4    | 4    | 4    |
| Sudan                     | 10                                              |      |      |      |      |      |      |      |      |      |      |      |      |      |      |      |      |      |      |      |      |
| Suriname                  | 4                                               | 4    | 4    | 4    | 4    | 4    | 4    | 4    | 4    | 8    | 8    | 8    | 8    | 16   | 11   | 12   | 13   | 14   | 14   |      |      |
| Swaziland                 | 0                                               | 0    | 0    | 0    | 0    | 0    | 0    | 0    | 0    | 0    | 0    | 0    | 0    | 0    | 0    | 0    | 0    | 0    | 0    | 0    | 0    |
| Sweden                    | -44                                             | -45  | -44  | -42  | -35  | -34  | -44  | -37  | -38  | -38  | -40  | -40  | -41  | -39  | -39  | -37  | -41  | -39  | -37  | -37  |      |
| Switzerland               | 5                                               | -1   | -3   | -3   | -3   | -3   | -2   | -1   | -2   | -3   | -3   | -1   | -2   | -2   | 0    | -2   | -2   | -2   | -1   | -2   |      |
| Syrian Arab Republic      | 0                                               | 0    | 0    | 0    | 0    | 0    |      |      |      |      |      |      |      |      |      |      |      |      |      |      |      |
| Tajikistan                | -2                                              | -2   | -2   | -2   | -2   | -2   | -2   | -2   | -2   | -2   | -2   | -2   | -2   | -2   | -2   | -2   | -2   | -2   | -2   |      |      |
| Thailand                  |                                                 |      |      |      |      | -16  | -16  | -16  | -16  | -16  | -16  | -16  | -16  | -16  | -16  | -16  | -16  | -16  | -16  |      |      |
| Macedonia                 |                                                 |      |      |      |      | -2   |      |      |      |      | -1   |      |      |      |      | -2   |      |      |      |      |      |
| Timor-Leste               |                                                 |      |      |      |      | 0    | 2    | -5   | -4   | -2   | 0    | -3   | -2   | -2   | 2    | -1   |      |      |      |      |      |
| Togo                      |                                                 |      | 1    | 1    | 1    | 1    | 1    | 1    | 1    | 1    | 1    | 1    | 1    | 1    | 1    | 1    | 1    | 1    | 1    | 1    |      |
| Tonga                     | -2                                              |      |      |      |      |      | -2   |      |      |      |      |      |      |      |      |      |      |      |      |      |      |
| Trinidad and Tobago       |                                                 |      |      |      |      |      | -2   | -2   | -2   | -2   | -2   | -2   | -2   | -2   | -2   | -2   | -2   | -2   | -2   |      |      |
| Tunisia                   | 3                                               |      |      |      |      |      |      |      |      |      | 4    | 3    | 4    |      |      |      |      |      |      |      |      |
| Turkey                    | -62                                             | -65  | -73  | -75  | -74  | -75  | -75  | -75  | -70  | -73  | -73  | -77  | -75  | -77  | -78  | -97  | -96  | -100 | -95  | -84  |      |
| Turkmenistan              | -1                                              |      |      |      | -1   |      |      |      |      |      |      |      |      |      |      |      |      |      |      |      |      |



**Supplementary table 5 (continues)**

|                           | LULUCF, gap-filled data in our NGHGI DB, Mt CO2/yr |      |      |      |      |      |      |      |      |      |      |      |      |      |      |      |      |      |      |      |      | Aver.<br>2000-2020 |
|---------------------------|----------------------------------------------------|------|------|------|------|------|------|------|------|------|------|------|------|------|------|------|------|------|------|------|------|--------------------|
|                           | 2000                                               | 2001 | 2002 | 2003 | 2004 | 2005 | 2006 | 2007 | 2008 | 2009 | 2010 | 2011 | 2012 | 2013 | 2014 | 2015 | 2016 | 2017 | 2018 | 2019 | 2020 |                    |
| Liechtenstein             | 0                                                  | 0    | 0    | 0    | 0    | 0    | 0    | 0    | 0    | 0    | 0    | 0    | 0    | 0    | 0    | 0    | 0    | 0    | 0    | 0    | 0    | 0                  |
| Lithuania                 | -10                                                | -7   | -6   | -6   | -5   | -4   | -4   | -6   | -7   | -8   | -11  | -11  | -10  | -10  | -9   | -8   | -7   | -7   | -7   | -6   | -6   | -7                 |
| Luxembourg                | -1                                                 | -1   | -1   | -1   | -1   | -1   | -1   | 0    | 0    | 0    | 0    | 0    | 0    | 0    | -1   | 0    | 0    | -1   | 0    | 0    | 0    | 0                  |
| Madagascar                | 34                                                 | 34   | 34   | 34   | 34   | 34   | 34   | 34   | 34   | 34   | 34   | 34   | 34   | 34   | 34   | 34   | 34   | 34   | 34   | 34   | 34   | 34                 |
| Malawi                    | -1                                                 | -1   | -1   | -1   | -1   | -1   | -1   | -1   | -1   | -1   | -1   | -1   | -1   | -1   | -1   | -1   | -1   | -1   | -1   | -1   | -1   | -1                 |
| Malaysia                  | -182                                               | -186 | -189 | -193 | -196 | -199 | -206 | -213 | -220 | -227 | -234 | -241 | -249 | -257 | -265 | -265 | -242 | -242 | -242 | -242 | -242 | -225               |
| Maldives                  |                                                    |      |      |      |      |      |      |      |      |      |      |      |      |      |      |      |      |      |      |      |      |                    |
| Mali                      | -259                                               | -259 | -259 | -259 | -259 | -259 | -259 | -259 | -255 | -213 | -245 | -272 | -241 | -259 | -155 | -155 | -155 | -155 | -155 | -155 | -155 | -221               |
| Malta                     | 0                                                  | 0    | 0    | 0    | 0    | 0    | 0    | 0    | 0    | 0    | 0    | 0    | 0    | 0    | 0    | 0    | 0    | 0    | 0    | 0    | 0    | 0                  |
| Marshall Islands          | 0                                                  | 0    | 0    | 0    | 0    | 0    | 0    | 0    | 0    | 0    | 0    | 0    | 0    | 0    | 0    | 0    | 0    | 0    | 0    | 0    | 0    | 0                  |
| Mauritania                | -1                                                 | -1   | -1   | -1   | -1   | -1   | -1   | -1   | -1   | -1   | -1   | -1   | -1   | -1   | -1   | -1   | 0    | 0    | 0    | 0    | 0    | 0                  |
| Mauritius                 | 0                                                  | 0    | 0    | 0    | 0    | 0    | 0    | 0    | 0    | 0    | 0    | 0    | 0    | 0    | 0    | 0    | 0    | 0    | 0    | 0    | 0    | 0                  |
| Mexico                    | -153                                               | -153 | -154 | -154 | -155 | -151 | -149 | -146 | -143 | -141 | -141 | -147 | -143 | -140 | -137 | -135 | -148 | -148 | -148 | -148 | -148 | -147               |
| Micronesia                | -1                                                 | -1   | -1   | -1   | -1   | -1   | -1   | -1   | -1   | -1   | -1   | -1   | -1   | -1   | -1   | -1   | -1   | -1   | -1   | -1   | -1   | -1                 |
| Monaco                    | 0                                                  | 0    | 0    | 0    | 0    | 0    | 0    | 0    | 0    | 0    | 0    | 0    | 0    | 0    | 0    | 0    | 0    | 0    | 0    | 0    | 0    | 0                  |
| Mongolia                  | -25                                                | -26  | -26  | -25  | -26  | -26  | -25  | -25  | -25  | -25  | -25  | -25  | -25  | -25  | -25  | -25  | -25  | -25  | -25  | -25  | -25  | -25                |
| Montenegro                | -2                                                 | -3   | -3   | -3   | -3   | -2   | -2   | -2   | -2   | -3   | -3   | -1   | -2   | -2   | -2   | -2   | -2   | -2   | -2   | -2   | -3   | -3                 |
| Morocco                   | -2                                                 | -2   | -2   | -2   | -2   | -2   | -2   | -2   | -2   | -2   | -2   | -2   | -2   | -2   | -2   | -2   | -2   | -2   | -2   | -2   | -2   | -2                 |
| Mozambique                | 39                                                 | 39   | 39   | 39   | 39   | 39   | 39   | 39   | 39   | 39   | 39   | 39   | 39   | 39   | 39   | 39   | 39   | 39   | 39   | 39   | 39   | 39                 |
| Myanmar                   | 52                                                 | 52   | 52   | 52   | 52   | 52   | 52   | 51   | 51   | 51   | 50   | 50   | 50   | 50   | 49   | 49   | 49   | 49   | 49   | 49   | 50   | 50                 |
| Namibia                   | -100                                               | -100 | -104 | -105 | -107 | -104 | -101 | -98  | -107 | -95  | -99  | -96  | -95  | -113 | -110 | -112 | -117 | -117 | -117 | -117 | -117 | -106               |
| Nauru                     |                                                    |      |      |      |      |      |      |      |      |      |      |      |      |      |      |      |      |      |      |      |      |                    |
| Nepal                     | -16                                                | -16  | -16  | -16  | -16  | -16  | -16  | -16  | -16  | -16  | -16  | -16  | -16  | -16  | -16  | -16  | -16  | -16  | -16  | -16  | -16  | -16                |
| Netherlands               | 5                                                  | 5    | 5    | 5    | 5    | 5    | 5    | 5    | 5    | 5    | 5    | 5    | 5    | 5    | 5    | 5    | 5    | 5    | 5    | 5    | 5    | 5                  |
| New Zealand               | -27                                                | -27  | -25  | -26  | -26  | -26  | -24  | -23  | -30  | -29  | -30  | -26  | -25  | -24  | -26  | -27  | -26  | -26  | -27  | -28  | -28  | -27                |
| Nicaragua                 | 17                                                 | 17   | 17   | 17   | 17   | 17   | 17   | 16   | 13   | 12   | 14   | 14   | 13   | 12   | 12   | 12   | 12   | 12   | 12   | 12   | 15   | 15                 |
| Niger                     | -35                                                | -35  | -35  | -35  | -35  | -35  | -35  | -35  | -35  | -35  | -35  | -35  | -35  | -35  | -35  | -35  | -35  | -35  | -35  | -35  | -35  | -35                |
| Nigeria                   | 251                                                | 254  | 257  | 261  | 265  | 269  | 272  | 276  | 278  | 283  | 287  | 290  | 295  | 298  | 303  | 308  | 311  | 315  | 315  | 315  | 315  | 287                |
| Niue                      | 0                                                  | 0    | 0    | 0    | 0    | 0    | 0    | 0    | 0    | 0    | 0    | 0    | 0    | 0    | 0    | 0    | 0    | 0    | 0    | 0    | 0    | 0                  |
| Norway                    | -20                                                | -22  | -23  | -25  | -24  | -21  | -23  | -24  | -25  | -28  | -25  | -26  | -22  | -23  | -19  | -15  | -15  | -16  | -17  | -19  | -19  | -22                |
| Oman                      |                                                    |      |      |      |      |      |      |      |      |      |      |      |      |      |      |      |      |      |      |      |      |                    |
| Pakistan                  | 3                                                  | 3    | 3    | 3    | 3    | 3    | 3    | 3    | 3    | 3    | 3    | 3    | 3    | 3    | 3    | 3    | 3    | 3    | 3    | 3    | 3    | 3                  |
| Palau                     | 0                                                  | 0    | 0    | 0    | 0    | 0    | 0    | 0    | 0    | 0    | 0    | 0    | 0    | 0    | 0    | 0    | 0    | 0    | 0    | 0    | 0    | 0                  |
| Panama                    | -10                                                | -10  | -10  | -10  | -10  | -10  | -10  | -22  | -18  | -15  | -26  | -22  | -20  | -25  | -25  | -22  | -22  | -22  | -22  | -22  | -22  | -18                |
| Papua New Guinea          | -22                                                | -22  | -13  | -14  | -11  | -18  | -13  | -10  | -9   | -5   | 0    | 2    | -2   | 4    | 1    | 2    | 2    | 2    | 2    | 2    | 2    | -6                 |
| Paraguay                  | 36                                                 | 31   | 30   | 30   | 30   | 32   | 37   | 38   | 42   | 35   | 35   | 35   | 47   | 46   | 17   | 16   | 13   | 13   | 13   | 13   | 29   | 29                 |
| Peru                      | 107                                                | 110  | 113  | 116  | 118  | 121  | 115  | 109  | 102  | 96   | 90   | 88   | 87   | 81   | 76   | 76   | 76   | 76   | 76   | 76   | 94   | 94                 |
| Philippines               | -105                                               | -105 | -105 | -105 | -105 | -105 | -105 | -105 | -105 | -105 | -105 | -105 | -105 | -105 | -105 | -105 | -105 | -105 | -105 | -105 | -105 | -105               |
| Poland                    | -38                                                | -30  | -39  | -41  | -52  | -51  | -45  | -39  | -38  | -37  | -35  | -42  | -41  | -43  | -35  | -31  | -33  | -37  | -38  | -17  | -17  | -37                |
| Portugal                  | -6                                                 | -9   | -9   | 2    | -8   | 1    | -9   | -13  | -14  | -14  | -10  | -11  | -9   | -8   | -10  | -9   | -5   | 8    | -7   | -8   | -8   | -7                 |
| Qatar                     |                                                    |      |      |      |      |      |      |      |      |      |      |      |      |      |      |      |      |      |      |      |      |                    |
| Republic of Korea         | -60                                                | -59  | -57  | -56  | -57  | -55  | -56  | -57  | -58  | -57  | -55  | -55  | -49  | -45  | -43  | -43  | -45  | -45  | -45  | -45  | -45  | -52                |
| Republic of Moldova       | 1                                                  | 1    | 1    | 2    | 2    | 2    | 1    | 1    | 2    | 1    | 2    | 2    | 2    | 2    | 2    | 2    | 2    | 2    | 2    | 2    | 2    | 2                  |
| Romania                   | -30                                                | -31  | -29  | -29  | -29  | -30  | -30  | -29  | -30  | -30  | -31  | -29  | -33  | -33  | -33  | -33  | -33  | -33  | -31  | -29  | -33  | -31                |
| Russian Federation        | -508                                               | -568 | -598 | -603 | -573 | -570 | -582 | -595 | -640 | -693 | -749 | -690 | -713 | -647 | -707 | -628 | -646 | -643 | -636 | -576 | -576 | -626               |
| Rwanda                    | -6                                                 | -6   | -6   | -6   | -6   | -6   | -6   | -5   | -6   | -6   | -6   | -6   | -6   | -6   | -6   | -7   | -7   | -7   | -7   | -7   | -7   | -6                 |
| Saint Kitts and Nevis     | 0                                                  | 0    | 0    | 0    | 0    | 0    | 0    | 0    | 0    | 0    | 0    | 0    | 0    | 0    | 0    | 0    | 0    | 0    | 0    | 0    | 0    | 0                  |
| Saint Lucia               | 0                                                  | 0    | 0    | 0    | 0    | 0    | 0    | 0    | 0    | 0    | 0    | 0    | 0    | 0    | 0    | 0    | 0    | 0    | 0    | 0    | 0    | 0                  |
| Saint Vincent and Grenad. | 0                                                  | 0    | 0    | 0    | 0    | 0    | 0    | 0    | 0    | 0    | 0    | 0    | 0    | 0    | 0    | 0    | 0    | 0    | 0    | 0    | 0    | 0                  |
| Samoa                     | -1                                                 | -1   | -1   | -1   | -1   | -1   | -1   | -1   | -1   | -1   | -1   | -1   | -1   | -1   | -1   | -1   | -1   | -1   | -1   | -1   | -1   | -1                 |
| San Marino                | 0                                                  | 0    | 0    | 0    | 0    | 0    | 0    | 0    | 0    | 0    | 0    | 0    | 0    | 0    | 0    | 0    | 0    | 0    | 0    | 0    | 0    | 0                  |
| Sao Tome and Principe     | 0                                                  | 0    | 0    | 0    | 0    | 0    | 0    | 0    | 0    | 0    | 0    | 0    | 0    | 0    | 0    | 0    | 0    | 0    | 0    | 0    | 0    | 0                  |
| Saudi Arabia              | -6                                                 | -6   | -6   | -7   | -7   | -7   | -8   | -8   | -8   | -9   | -9   | -9   | -9   | -9   | -9   | -9   | -9   | -9   | -9   | -9   | -9   | -8                 |
| Senegal                   | -13                                                | -13  | -13  | -13  | -13  | -13  | -13  | -13  | -13  | -13  | -13  | -13  | -13  | -13  | -12  | -12  | -12  | -12  | -12  | -12  | -12  | -13                |
| Serbia                    | -14                                                | -14  | -13  | -12  | -12  | -11  | -12  | -13  | -14  | -15  | -17  | -17  | -15  | -16  | -18  | -18  | -18  | -18  | -18  | -16  | -16  | -15                |
| Seychelles                | -1                                                 | -1   | -1   | -1   | -1   | -1   | -1   | -1   | -1   | -1   | -1   | -1   | -1   | -1   | -1   | -1   | -1   | -1   | -1   | -1   | -1   | -1                 |
| Sierra Leone              |                                                    |      |      |      |      |      |      |      |      |      |      |      |      |      |      |      |      |      |      |      |      |                    |
| Singapore                 | 0                                                  | 0    | 0    | 0    | 0    | 0    | 0    | 0    | 0    | 0    | 0    | 0    | 0    | 0    | 0    | 0    | 0    | 0    | 0    | 0    | 0    | 0                  |
| Slovakia                  | -10                                                | -9   | -10  | -9   | -9   | -6   | -9   | -8   | -7   | -7   | -6   | -7   | -8   | -8   | -6   | -7   | -7   | -7   | -6   | -6   | -6   | -7                 |
| Slovenia                  | -6                                                 | -6   | -8   | -7   | -7   | -7   | -7   | -8   | -8   | -7   | -7   | -7   | -7   | -7   | -6   | 0    | 1    | 1    | 1    | 0    | 0    | -5                 |
| Solomon Islands           | 2                                                  | 2    | 3    | 2    | 3    | 6    | 5    | 6    | 7    | 6    | 7    | 6    | 7    | 9    | 9    | 13   | 14   | 15   | 16   | 16   | 16   | 9                  |
| Somalia                   | -9                                                 | -4   | -5   | -5   | -7   | 8    | 10   | 8    | 8    | 10   | 14   | 19   | 19   | 31   | 37   | 37   | 37   | 37   | 37   | 37   | 37   | 18                 |
| South Africa              | -12                                                | -6   | -12  | -18  | -13  | 0    | -3   | -6   | 0    | -14  | -11  | -11  | -11  | -19  | -17  | -23  | -33  | -31  | -31  | -31  | -31  | -16                |
| South Sudan               | 0                                                  | 0    | 0    | 0    | 0    | 0    | 0    | 0    | 0    | 0    | 0    | 0    | 0    | 0    | 0    | 0    | 0    | 0    | 0    | 0    | 0    | 0                  |
| Spain                     | -40                                                | -41  | -40  | -39  | -39  | -39  | -41  | -39  | -38  | -36  | -38  | -38  | -36  | -35  | -37  | -39  | -39  | -39  | -39  | -38  | -38  | -39                |
| Sri Lanka                 | 4                                                  | 4    | 4    | 4    | 4    | 4    | 4    | 4    | 4    | 4    | 4    | 4    | 4    | 4    | 4    | 4    | 4    | 4    | 4    | 4    | 4    | 4                  |
| Sudan                     | 10                                                 | 10   | 10   | 10   | 10   | 10   | 10   | 10   | 10   | 10   | 10   | 10   | 10   | 10   | 10   | 10   | 10   | 10   | 10   | 10   | 10   | 10                 |
| Suriname                  | 4                                                  | 4    | 4    | 4    | 4    | 4    | 4    | 4    | 4    | 8    | 8    | 8    | 8    | 16   | 11   | 12   | 13   | 14   | 14   | 14   | 14   | 9                  |
| Swaziland                 | 4                                                  | 4    | 4    | 4    | 4    | 4    | 4    | 4    | 4    | -3   | -3   | -3   | -3   | -3   | -3   | -3   | -3   | -3   | -3   | -3   | -4   | -4                 |
| Sweden                    | -44                                                | -45  | -44  | -42  | -35  | -34  | -44  | -37  | -38  | -38  | -40  | -40  | -41  | -39  | -39  | -37  | -41  | -39  | -37  | -37  | -37  | -39                |
| Switzerland               | 5                                                  | -1   | -3   | -3   | -3   | -3   | -2   | -1   | -2   | -3   | -3   | -1   | -2   | -2   | 0    | -2   | -2   | -2   | -1   | -2   | -2   | 2                  |
| Syrian Arab Republic      | 0                                                  | 0    | 0    | 0    | 0    | 0    | 0    | 0    | 0    | 0    | 0    | 0    | 0    | 0    | 0    | 0    | 0    | 0    | 0    | 0    | 0    | 0                  |
| Tajikistan                | -2                                                 | -2   | -2   | -2   | -2   | -2   | -2   | -2   | -2   | -2   | -2   | -2   | -2   | -2   | -2   | -2   | -2   | -2   | -2   | -2   | -2   | -2                 |
| Thailand                  | -16                                                | -16  | -16  | -16  | -16  | -16  | -16  | -16  | -16  | -16  | -16  | -16  | -16  | -16  | -16  | -16  | -16  | -16  | -16  | -16  | -16  | -16                |
| Macedonia                 | -2                                                 | -2   | -2   | -2   | -2   | -2   | -2   | -2   | -2   | -2   | -2   | -1   | -1   | -1   | -1   | -1   | -2   | -2   | -3   | -3   | -4   | -4                 |
| Timor-Leste               | 0                                                  | 0    | 0    | 0    | 0    | 0    | 2    | -5   | -4   | -2   | 0    | -3   | -2   | -2   | -2   | -1   | -1   | -1   | -1   | -1   | -1   | -1                 |
| Togo                      | 1                                                  | 1    | 1    | 1    | 1    | 1    | 1    | 1    | 1    | 1    | 1    | 1    | 1    | 1    | 1    | 1    | 1    | 1    | 1    | 1    | 1    | 1                  |
| Tonga                     | -2                                                 | -2   | -2   | -2   | -2   | -2   | -2   | -2   | -2   | -2   | -2   | -2   | -2   | -2   | -2   | -2   | -2   | -2   | -2   | -2   | -2   | -2                 |
| Trinidad and Tobago       | -2                                                 | -2   | -2   | -2   | -2   | -2   | -2   | -2   | -2   | -2   | -2   | -2   | -2   | -2   | -2   | -2   | -2   | -2   | -2   | -2   | -2   | -2                 |
| Tunisia                   | 3                                                  | 3    | 2    | 2    | 2    | 2    | 2    | 2    | 1    | 1    | 4    | 3    | 4    | 4    | 4    | 4    | 4    | 4    | 4    | 4    | 4    | 3                  |
| Turkey                    | -62                                                | -65  | -73  | -75  | -74  | -75  |      |      |      |      |      |      |      |      |      |      |      |      |      |      |      |                    |

**Supplementary table 6.** CO<sub>2</sub> flux from Forest land (including Harvested Wood Products), Deforestation, Organic soils (including peat fires) and Other (including Cropland, Grassland Wetland, Settlement, and Other Land), as included in our NGHGI DB, both grouped for different periods and averaged for 2000-2020. Data are gap-filled through linear interpolation between two data, and/or extrapolation backward (from 2000) and forward (until 2020), using the nearest available data.

|                        | Forest Land, Mt CO2/yr |           |           |           |           | Deforestation, Mt CO2/yr |           |           |           |           | Organic soils, Mt CO2/yr |           |           |           |           | Other, Mt CO2/yr |           |           |           |           |
|------------------------|------------------------|-----------|-----------|-----------|-----------|--------------------------|-----------|-----------|-----------|-----------|--------------------------|-----------|-----------|-----------|-----------|------------------|-----------|-----------|-----------|-----------|
|                        | 2000-2005              | 2006-2010 | 2011-2015 | 2016-2020 | 2000-2020 | 2000-2005                | 2006-2010 | 2011-2015 | 2016-2020 | 2000-2020 | 2000-2005                | 2006-2010 | 2011-2015 | 2016-2020 | 2000-2020 | 2000-2005        | 2006-2010 | 2011-2015 | 2016-2020 | 2000-2020 |
| Afghanistan            | 1                      | 1         | -2        | 1         | 1         | 9                        | 9         | 9         | 9         | 9         | 0                        | 0         | 0         | 0         | 0         | 0                | 0         | 0         | 0         | 0         |
| Albania                | -2                     | -2        | -2        | -2        | -2        | 4                        | 4         | 5         | 4         | 4         | 0                        | 0         | 0         | 0         | 0         | 2                | 1         | 1         | 1         | 1         |
| Algeria                | -8                     | -8        | -8        | -8        | -8        | 0                        | 0         | 0         | 0         | 0         | 0                        | 0         | 0         | 0         | 0         | 0                | 0         | 0         | 0         | 0         |
| Andorra                | 0                      | 0         | 0         | 0         | 0         | 0                        | 0         | 0         | 0         | 0         | 0                        | 0         | 0         | 0         | 0         | 0                | 0         | 0         | 0         | 0         |
| Angola                 | -2                     | -2        | 7         | 7         | 2         | 42                       | 42        | 63        | 63        | 52        | 0                        | 0         | 0         | 0         | 0         | 0                | 0         | 0         | 0         | 0         |
| Antigua and Barbuda    | 0                      | 0         | 0         | 0         | 0         | 0                        | 0         | 0         | 0         | 0         | 0                        | 0         | 0         | 0         | 0         | 0                | 0         | 0         | 0         | 0         |
| Argentina              | -11                    | -11       | -11       | -11       | -11       | 99                       | 96        | 74        | 44        | 79        | 0                        | 0         | 0         | 0         | 0         | 5                | 5         | 5         | 5         | 5         |
| Armenia                | 0                      | -1        | -1        | -1        | -1        | 0                        | 0         | 0         | 0         | 0         | 0                        | 0         | 0         | 0         | 0         | -2               | -1        | -1        | -2        | -1        |
| Australia              | -27                    | -28       | -53       | -67       | -43       | 82                       | 75        | 47        | 38        | 62        | 0                        | 0         | 0         | 0         | 0         | -8               | 11        | 1         | -15       | -3        |
| Austria                | -14                    | -6        | -6        | -6        | -8        | 1                        | 1         | 0         | 0         | 1         | 0                        | 0         | 0         | 0         | 0         | 0                | 0         | 0         | 0         | 0         |
| Azerbaijan             | -3                     | -3        | -3        | -3        | -3        | 0                        | 0         | 0         | 0         | 0         | 0                        | 0         | 0         | 0         | 0         | 0                | 0         | 0         | 0         | 0         |
| Bahamas                | -4                     | -4        | -4        | -4        | -4        | 0                        | 0         | 0         | 0         | 0         | 0                        | 0         | 0         | 0         | 0         | 0                | 0         | 0         | 0         | 0         |
| Bahrain                | 0                      | 0         | 0         | 0         | 0         | 0                        | 0         | 0         | 0         | 0         | 0                        | 0         | 0         | 0         | 0         | 0                | 0         | 0         | 0         | 0         |
| Bangladesh             | 0                      | 0         | 0         | 0         | 0         | 1                        | 1         | 1         | 1         | 1         | 0                        | 0         | 0         | 0         | 0         | 0                | 0         | 0         | 0         | 0         |
| Barbados               | 0                      | 0         | 0         | 0         | 0         | 0                        | 0         | 0         | 0         | 0         | 0                        | 0         | 0         | 0         | 0         | 0                | 0         | 0         | 0         | 0         |
| Belarus                | -43                    | -50       | -52       | -41       | -46       | 0                        | 0         | 0         | 0         | 0         | 4                        | 4         | 4         | 4         | 4         | 0                | 0         | 0         | 1         | 0         |
| Belgium                | -2                     | -2        | -2        | -2        | -2        | 0                        | 0         | 0         | 1         | 0         | 0                        | 0         | 0         | 0         | 0         | 0                | 0         | 0         | 0         | 0         |
| Belize                 | -13                    | -14       | -13       | -11       | -13       | 1                        | 3         | 4         | 3         | 3         | 0                        | 0         | 0         | 0         | 0         | 1                | 2         | 2         | 1         | 1         |
| Benin                  | -31                    | -27       | -23       | -22       | -26       | 20                       | 19        | 14        | 14        | 17        | 0                        | 0         | 0         | 0         | 0         | 8                | 7         | 5         | 5         | 6         |
| Bhutan                 | -8                     | -8        | -8        | -8        | -8        | 0                        | 0         | 0         | 0         | 0         | 0                        | 0         | 0         | 0         | 0         | 0                | 0         | 0         | 0         | 0         |
| Bolivia                | 24                     | 14        | 10        | 10        | 15        | 16                       | 26        | 28        | 28        | 24        | 0                        | 0         | 0         | 0         | 0         | 0                | -1        | -2        | -2        | -1        |
| Bosnia and Herzegovina | -6                     | -7        | -6        | -6        | -7        | 0                        | 0         | 0         | 0         | 0         | 0                        | 0         | 0         | 0         | 0         | 0                | 0         | 0         | 0         | 0         |
| Botswana               | -18                    | -18       | -18       | -18       | -18       | 15                       | 15        | 15        | 15        | 15        | 0                        | 0         | 0         | 0         | 0         | 0                | 0         | 0         | 0         | 0         |
| Brazil                 | -236                   | -397      | -397      | -400      | -352      | 1851                     | 1057      | 668       | 770       | 1123      | 0                        | 0         | 0         | 0         | 0         | 27               | 6         | 1         | -4        | 8         |
| Brunei Darussalam      | -3                     | -3        | -3        | -3        | -3        | 0                        | 0         | 0         | 0         | 0         | 0                        | 0         | 0         | 0         | 0         | 0                | 0         | 0         | 0         | 0         |
| Bulgaria               | -14                    | -12       | -10       | -10       | -11       | 0                        | 0         | 0         | 0         | 0         | 0                        | 0         | 0         | 0         | 0         | -2               | -2        | 0         | 0         | -1        |
| Burkina Faso           | 25                     | 27        | 31        | 36        | 29        | 8                        | 8         | 9         | 8         | 8         | 0                        | 0         | 0         | 0         | 0         | 0                | 0         | 0         | 0         | 0         |
| Burundi                | -4                     | -2        | -1        | -1        | -2        | 0                        | 0         | 0         | 0         | 0         | 0                        | 0         | 0         | 0         | 0         | 0                | 0         | 0         | 0         | 0         |
| Cape Verde             | 0                      | 0         | 0         | 0         | 0         | 0                        | 0         | 0         | 0         | 0         | 0                        | 0         | 0         | 0         | 0         | 0                | 0         | 0         | 0         | 0         |
| Cambodia               | 0                      | 0         | 0         | 0         | 0         | 72                       | 72        | 66        | 41        | 63        | 0                        | 0         | 0         | 0         | 0         | 0                | 0         | 0         | 0         | 0         |
| Cameroon               | -87                    | -87       | -87       | -87       | -87       | 0                        | 0         | 0         | 0         | 0         | 0                        | 0         | 0         | 0         | 0         | 10               | 10        | 10        | 10        | 10        |
| Canada                 | -19                    | -6        | -1        | 5         | -6        | 8                        | 7         | 7         | 7         | 7         | 0                        | 0         | 0         | 0         | 0         | -10              | -14       | -11       | -8        | -11       |
| Central African Rep.   | -333                   | -333      | -333      | -333      | -333      | 104                      | 104       | 104       | 104       | 104       | 0                        | 0         | 0         | 0         | 0         | 0                | 0         | 0         | 0         | 0         |
| Chad                   | -7                     | -5        | -3        | -1        | -4        | 0                        | 0         | 0         | 0         | 0         | 0                        | 0         | 0         | 0         | 0         | 2                | 0         | 0         | 0         | 1         |
| Chile                  | -77                    | -74       | -72       | -60       | -71       | 3                        | 2         | 2         | 3         | 3         | 0                        | 0         | 0         | 0         | 0         | 1                | 2         | 1         | -1        | 1         |
| China                  | -682                   | -798      | -753      | -950      | -790      | 0                        | 0         | 0         | 0         | 0         | 0                        | 0         | 0         | 0         | 0         | -121             | -141      | -156      | -201      | -153      |
| Colombia               | -16                    | -22       | -23       | -22       | -20       | 103                      | 95        | 89        | 86        | 94        | 0                        | 0         | 0         | 0         | 0         | 0                | 0         | 0         | 0         | 0         |
| Comoros                | -2                     | -2        | -2        | -2        | -2        | 0                        | 0         | 0         | 0         | 0         | 0                        | 0         | 0         | 0         | 0         | 0                | 0         | 0         | 0         | 0         |
| Congo                  | -15                    | -21       | -24       | -32       | -23       | 2                        | 4         | 5         | 11        | 5         | 0                        | 0         | 0         | 0         | 0         | -3               | 0         | 0         | 0         | -1        |
| Cook Islands           | 0                      | 0         | 0         | 0         | 0         | 0                        | 0         | 0         | 0         | 0         | 0                        | 0         | 0         | 0         | 0         | 0                | 0         | 0         | 0         | 0         |
| Costa Rica             | -3                     | -3        | -5        | -5        | -4        | 11                       | 7         | 7         | 2         | 7         | 0                        | 0         | 0         | 0         | 0         | 0                | 0         | 0         | 0         | 0         |
| Cote d'Ivoire          | -3                     | -12       | -19       | -21       | -13       | 41                       | 41        | 41        | 41        | 41        | 0                        | 0         | 0         | 0         | 0         | 0                | 0         | 0         | 0         | 0         |
| Croatia                | -8                     | -8        | -7        | -6        | -7        | 0                        | 0         | 0         | 0         | 0         | 0                        | 0         | 0         | 0         | 0         | 1                | 1         | 1         | 1         | 1         |
| Cuba                   | 18                     | 10        | -25       | -27       | -5        | 0                        | 0         | 0         | 0         | 0         | 0                        | 0         | 0         | 0         | 0         | 0                | 0         | 0         | 0         | 0         |
| Cyprus                 | 0                      | 0         | 0         | 0         | 0         | 0                        | 0         | 0         | 0         | 0         | 0                        | 0         | 0         | 0         | 0         | 0                | 0         | 0         | 0         | 0         |
| Czech Republic         | -9                     | -7        | -8        | 4         | -5        | 0                        | 0         | 0         | 0         | 0         | 0                        | 0         | 0         | 0         | 0         | 0                | 0         | 0         | 0         | 0         |
| Dem. Rep. Korea        | -19                    | -19       | -19       | -19       | -19       | 2                        | 2         | 2         | 2         | 2         | 0                        | 0         | 0         | 0         | 0         | 0                | 0         | 0         | 0         | 0         |
| Dem. Rep. Congo (DRC)  | 0                      | 0         | 0         | 0         | 0         | 484                      | 484       | 770       | 529       | 563       | 0                        | 0         | 0         | 0         | 0         | 0                | 0         | 0         | 0         | 0         |
| Denmark                | -2                     | -2        | -4        | -3        | -3        | 0                        | 0         | 0         | 0         | 0         | 5                        | 5         | 5         | 5         | 5         | 0                | 0         | 0         | 0         | 0         |
| Djibouti               | -2                     | -3        | -7        | -7        | -4        | 0                        | 0         | 0         | 0         | 0         | 0                        | 0         | 0         | 0         | 0         | 0                | 0         | 0         | 0         | 0         |
| Dominica               | 0                      | 0         | -1        | -2        | -1        | 0                        | 0         | 0         | 0         | 0         | 0                        | 0         | 0         | 0         | 0         | 0                | 0         | 0         | 0         | 0         |
| Dominican Republic     | -2                     | -2        | -2        | -2        | -2        | 4                        | 4         | 4         | 4         | 4         | 0                        | 0         | 0         | 0         | 0         | 0                | 0         | 0         | 0         | 0         |
| Ecuador                | -11                    | -13       | -19       | -19       | -15       | 49                       | 42        | 39        | 39        | 43        | 0                        | 0         | 0         | 0         | 0         | 0                | 0         | 0         | 0         | 0         |
| Egypt                  | 0                      | 0         | 0         | 0         | 0         | 0                        | 0         | 0         | 0         | 0         | 0                        | 0         | 0         | 0         | 0         | 0                | 0         | 0         | 0         | 0         |
| El Salvador            | 0                      | 0         | -2        | -2        | -1        | 2                        | 2         | 1         | 1         | 2         | 0                        | 0         | 0         | 0         | 0         | 0                | 0         | 0         | 0         | 0         |
| Equatorial Guinea      | 5                      | 5         | 5         | 5         | 5         | 3                        | 3         | 3         | 3         | 3         | 0                        | 0         | 0         | 0         | 0         | 0                | 0         | 0         | 0         | 0         |
| Eritrea                | 0                      | 0         | 0         | 0         | 0         | 0                        | 0         | 0         | 0         | 0         | 0                        | 0         | 0         | 0         | 0         | 0                | 0         | 0         | 0         | 0         |
| Estonia                | -6                     | -6        | -6        | -4        | -5        | 0                        | 1         | 0         | 0         | 0         | 1                        | 1         | 1         | 1         | 1         | 0                | 0         | 1         | 1         | 1         |
| Ethiopia               | -91                    | -85       | -87       | -87       | -88       | 192                      | 155       | 133       | 120       | 152       | 0                        | 0         | 0         | 0         | 0         | 0                | 0         | 0         | 0         | 0         |
| Fiji                   | 0                      | 0         | 1         | 1         | 0         | 0                        | 0         | 0         | 0         | 0         | 0                        | 0         | 0         | 0         | 0         | 0                | 0         | 0         | 0         | 0         |
| Finland                | -41                    | -46       | -41       | -33       | -40       | 3                        | 4         | 4         | 3         | 3         | 15                       | 15        | 13        | 12        | 14        | 2                | 2         | 1         | 1         | 1         |
| France                 | -57                    | -71       | -60       | -53       | -60       | 9                        | 15        | 10        | 10        | 11        | 0                        | 0         | 0         | 0         | 0         | 9                | 10        | 9         | 7         | 9         |
| Gabon                  | -103                   | -121      | -127      | -121      | -117      | 3                        | 6         | 11        | 12        | 8         | 0                        | 0         | 0         | 0         | 0         | 0                | 0         | 0         | 0         | 0         |
| Gambia                 | -1                     | -1        | -1        | -1        | -1        | 2                        | 2         | 2         | 2         | 2         | 0                        | 0         | 0         | 0         | 0         | 0                | 0         | 0         | 0         | 0         |
| Georgia                | -6                     | -5        | -6        | -6        | -6        | 0                        | 0         | 0         | 0         | 0         | 0                        | 0         | 0         | 0         | 0         | 1                | 1         | 1         | 1         | 1         |
| Germany                | -59                    | -56       | -65       | -66       | -61       | 1                        | 1         | 1         | 1         | 1         | 42                       | 41        | 41        | 40        | 41        | 6                | 3         | 3         | 3         | 4         |
| Ghana                  | -5                     | -5        | -5        | -5        | -5        | 18                       | 18        | 18        | 18        | 18        | 0                        | 0         | 0         | 0         | 0         | 0                | 0         | 0         | 0         | 0         |
| Greece                 | -2                     | -2        | -2        | -2        | -2        | 0                        | 0         | 0         | 0         | 0         | 0                        | 0         | 0         | 0         | 0         | -1               | -1        | 0         | -2        | -1        |
| Grenada                | 0                      | 0         | 0         | 0         | 0         | 0                        | 0         | 0         | 0         | 0         | 0                        | 0         | 0         | 0         | 0         | 0                | 0         | 0         | 0         | 0         |
| Guatemala              | 1                      | 1         | 1         | 1         | 1         | 16                       | 16        | 16        | 16        | 16        | 0                        | 0         | 0         | 0         | 0         | 0                | 0         | 0         | 0         | 0         |
| Guinea                 | 12                     | 15        | 15        | 15        | 14        | 19                       | 19        | 19        | 19        | 19        | 0                        | 0         | 0         | 0         | 0         | 3                | 0         | 0         | 0         | 1         |
| Guinea Bissau          | -20                    | -20       | -20       | -20       | -20       | 0                        | 0         | 0         | 0         | 0         | 0                        | 0         | 0         | 0         | 0         | 19               | 19        | 19        | 19        | 19        |
| Guyana                 | 0                      | 0         | 0         | 0         | 0         | 46                       | 46        | 46        | 46        | 46        | 0                        | 0         | 0         | 0         | 0         | 0                | 0         | 0         | 0         | 0         |
| Haiti                  | 1                      | 1         | 1         | 1         | 1         | 0                        | 0         | 0         | 0         | 0         | 0                        | 0         | 0         | 0         | 0         | 0                | 0         | 0         | 0         | 0         |
| Honduras               | -13                    | -13       |           |           |           |                          |           |           |           |           |                          |           |           |           |           |                  |           |           |           |           |

**Supplementary table 6 (continues)**

|                           | Forest Land, Mt CO2/yr |           |           |           |           | Deforestation, Mt CO2/yr |           |           |           |           | Organic soils, Mt CO2/yr |           |           |           |           | Other, Mt CO2/yr |           |           |           |           |
|---------------------------|------------------------|-----------|-----------|-----------|-----------|--------------------------|-----------|-----------|-----------|-----------|--------------------------|-----------|-----------|-----------|-----------|------------------|-----------|-----------|-----------|-----------|
|                           | 2000-2005              | 2006-2010 | 2011-2015 | 2016-2020 | 2000-2020 | 2000-2005                | 2006-2010 | 2011-2015 | 2016-2020 | 2000-2020 | 2000-2005                | 2006-2010 | 2011-2015 | 2016-2020 | 2000-2020 | 2000-2005        | 2006-2010 | 2011-2015 | 2016-2020 | 2000-2020 |
|                           |                        |           |           |           |           |                          |           |           |           |           |                          |           |           |           |           |                  |           |           |           |           |
| Liechtenstein             | 0                      | 0         | 0         | 0         | 0         | 0                        | 0         | 0         | 0         | 0         | 0                        | 0         | 0         | 0         | 0         | 0                | 0         | 0         | 0         | 0         |
| Lithuania                 | -8                     | -9        | -11       | -8        | -9        | 0                        | 0         | 0         | 0         | 0         | 0                        | 0         | 0         | 0         | 0         | 1                | 2         | 2         | 2         | 2         |
| Luxembourg                | -1                     | -1        | 0         | 0         | -1        | 0                        | 0         | 0         | 0         | 0         | 0                        | 0         | 0         | 0         | 0         | 0                | 0         | 0         | 0         | 0         |
| Madagascar                | 0                      | 0         | 0         | 0         | 0         | 34                       | 34        | 34        | 34        | 34        | 0                        | 0         | 0         | 0         | 0         | 0                | 0         | 0         | 0         | 0         |
| Malawi                    | -3                     | -3        | -3        | -3        | -3        | 2                        | 2         | 2         | 2         | 2         | 0                        | 0         | 0         | 0         | 0         | 0                | 0         | 0         | 0         | 0         |
| Malaysia                  | -236                   | -240      | -259      | -259      | -248      | 47                       | 20        | 6         | 18        | 24        | 0                        | 0         | 0         | 0         | 0         | 0                | 0         | 0         | 0         | 0         |
| Maldives                  |                        |           |           |           |           |                          |           |           |           |           | 0                        | 0         | 0         | 0         | 0         | 0                | 0         | 0         | 0         | 0         |
| Mal                       | -277                   | -264      | -234      | -173      | -239      | 18                       | 18        | 18        | 18        | 18        | 0                        | 0         | 0         | 0         | 0         | 0                | 0         | 0         | 0         | 0         |
| Malta                     | 0                      | 0         | 0         | 0         | 0         | 0                        | 0         | 0         | 0         | 0         | 0                        | 0         | 0         | 0         | 0         | 0                | 0         | 0         | 0         | 0         |
| Marshall Islands          |                        |           |           |           |           |                          |           |           |           |           | 0                        | 0         | 0         | 0         | 0         | 0                | 0         | 0         | 0         | 0         |
| Mauritania                | -1                     | -1        | -1        | -1        | -1        | 0                        | 0         | 0         | 0         | 0         | 0                        | 0         | 0         | 0         | 0         | 0                | 0         | 0         | 0         | 0         |
| Mauritius                 | 0                      | 0         | 0         | 0         | 0         | 0                        | 0         | 0         | 0         | 0         | 0                        | 0         | 0         | 0         | 0         | 0                | 0         | 0         | 0         | 0         |
| Mexico                    | -140                   | -138      | -135      | -140      | -138      | 17                       | 18        | 19        | 20        | 18        | 0                        | 0         | 0         | 0         | 0         | -30              | -24       | -25       | -29       | -27       |
| Micronesia                | -1                     | -1        | -1        | -1        | -1        | 0                        | 0         | 0         | 0         | 0         | 0                        | 0         | 0         | 0         | 0         | 0                | 0         | 0         | 0         | 0         |
| Monaco                    | 0                      | 0         | 0         | 0         | 0         | 0                        | 0         | 0         | 0         | 0         | 0                        | 0         | 0         | 0         | 0         | 0                | 0         | 0         | 0         | 0         |
| Mongolia                  | -26                    | -25       | -25       | -25       | -25       | 0                        | 0         | 0         | 0         | 0         | 0                        | 0         | 0         | 0         | 0         | 0                | 0         | 0         | 0         | 0         |
| Montenegro                | -3                     | -2        | -2        | -2        | -2        | 0                        | 0         | 0         | 0         | 0         | 0                        | 0         | 0         | 0         | 0         | 0                | 0         | 0         | 0         | 0         |
| Morocco                   | -2                     | -2        | -2        | -2        | -2        | 0                        | 0         | 0         | 0         | 0         | 0                        | 0         | 0         | 0         | 0         | 0                | 0         | 0         | 0         | 0         |
| Mozambique                | 0                      | 0         | 0         | 0         | 0         | 39                       | 39        | 39        | 39        | 39        | 0                        | 0         | 0         | 0         | 0         | 0                | 0         | 0         | 0         | 0         |
| Myanmar                   | -2                     | -3        | -4        | -5        | -3        | 54                       | 54        | 54        | 54        | 54        | 0                        | 0         | 0         | 0         | 0         | 0                | 0         | 0         | 0         | 0         |
| Namibia                   | -112                   | -109      | -115      | -127      | -115      | 9                        | 9         | 10        | 10        | 9         | 0                        | 0         | 0         | 0         | 0         | 0                | 0         | 0         | 0         | 0         |
| Nauru                     |                        |           |           |           |           |                          |           |           |           |           | 0                        | 0         | 0         | 0         | 0         | 0                | 0         | 0         | 0         | 0         |
| Nepal                     | -16                    | -16       | -16       | -16       | -16       | 0                        | 0         | 0         | 0         | 0         | 0                        | 0         | 0         | 0         | 0         | 0                | 0         | 0         | 0         | 0         |
| Netherlands               | -2                     | -2        | -2        | -2        | -2        | 1                        | 1         | 1         | 1         | 1         | 6                        | 6         | 5         | 5         | 6         | 1                | 1         | 1         | 0         | 1         |
| New Zealand               | -31                    | -38       | -33       | -31       | -33       | 3                        | 8         | 6         | 3         | 5         | 2                        | 2         | 2         | 2         | 2         | -1               | 0         | 0         | 0         | 0         |
| Nicaragua                 | 2                      | 1         | -1        | -2        | 0         | 14                       | 14        | 14        | 14        | 14        | 0                        | 0         | 0         | 0         | 0         | 0                | 0         | 0         | 0         | 0         |
| Niger                     | -56                    | -56       | -56       | -56       | -56       | 2                        | 2         | 2         | 2         | 2         | 0                        | 0         | 0         | 0         | 0         | 19               | 19        | 19        | 19        | 19        |
| Nigeria                   | -6                     | -5        | -5        | -5        | -5        | 263                      | 284       | 304       | 319       | 291       | 0                        | 0         | 0         | 0         | 0         | 0                | 0         | 0         | 0         | 0         |
| Niue                      | 0                      | 0         | 0         | 0         | 0         | 0                        | 0         | 0         | 0         | 0         | 0                        | 0         | 0         | 0         | 0         | 0                | 0         | 0         | 0         | 0         |
| Norway                    | -28                    | -30       | -26       | -23       | -27       | 3                        | 3         | 3         | 3         | 3         | 3                        | 3         | 3         | 3         | 3         | 0                | 0         | 0         | 0         | 0         |
| Oman                      |                        |           |           |           |           |                          |           |           |           |           | 0                        | 0         | 0         | 0         | 0         | 0                | 0         | 0         | 0         | 0         |
| Pakistan                  | -12                    | -12       | -12       | -12       | -12       | 15                       | 15        | 15        | 15        | 15        | 0                        | 0         | 0         | 0         | 0         | 0                | 0         | 0         | 0         | 0         |
| Palau                     | 0                      | 0         | 0         | 0         | 0         | 0                        | 0         | 0         | 0         | 0         | 0                        | 0         | 0         | 0         | 0         | 0                | 0         | 0         | 0         | 0         |
| Panama                    | -28                    | -30       | -31       | -31       | -30       | 18                       | 12        | 8         | 9         | 12        | 0                        | 0         | 0         | 0         | 0         | 0                | 0         | 0         | 0         | 0         |
| Papua New Guinea          | -19                    | -11       | -10       | -13       | -13       | 3                        | 4         | 11        | 13        | 9         | 0                        | 0         | 0         | 0         | 0         | 0                | 0         | 0         | 0         | 0         |
| Paraguay                  | -15                    | -15       | -21       | -24       | -18       | 46                       | 52        | 54        | 37        | 47        | 0                        | 0         | 0         | 0         | 0         | 0                | 0         | 0         | 0         | 0         |
| Peru                      | 18                     | 18        | 9         | 14        | 15        | 95                       | 84        | 73        | 62        | 79        | 0                        | 0         | 0         | 0         | 0         | 0                | 0         | 0         | 0         | 0         |
| Philippines               | -105                   | -105      | -105      | -105      | -105      | 0                        | 0         | 0         | 0         | 0         | 0                        | 0         | 0         | 0         | 0         | 0                | 0         | 0         | 0         | 0         |
| Poland                    | -42                    | -41       | -42       | -33       | -40       | 0                        | 0         | 0         | 1         | 1         | 2                        | 2         | 2         | 2         | 2         | 0                | 0         | 1         | 1         | 0         |
| Portugal                  | -9                     | -14       | -12       | -6        | -10       | 3                        | 2         | 2         | 2         | 2         | 0                        | 0         | 0         | 0         | 0         | 1                | 0         | 1         | 1         | 1         |
| Qatar                     |                        |           |           |           |           |                          |           |           |           |           | 0                        | 0         | 0         | 0         | 0         | 0                | 0         | 0         | 0         | 0         |
| Republic of Korea         | -61                    | -61       | -51       | -49       | -56       | 0                        | 0         | 0         | 0         | 0         | 0                        | 0         | 0         | 0         | 0         | 3                | 4         | 4         | 4         | 4         |
| Republic of Moldova       | -2                     | -2        | -2        | -2        | -2        | 2                        | 2         | 2         | 2         | 2         | 0                        | 0         | 0         | 0         | 0         | 2                | 1         | 2         | 2         | 2         |
| Romania                   | -34                    | -35       | -34       | -32       | -34       | 6                        | 6         | 4         | 3         | 5         | 0                        | 0         | 0         | 0         | 0         | -1               | -1        | -3        | -4        | -2        |
| Russian Federation        | -621                   | -699      | -721      | -671      | -675      | 8                        | 6         | 8         | 8         | 8         | 125                      | 118       | 115       | 115       | 118       | -83              | -76       | -79       | -66       | -76       |
| Rwanda                    | -6                     | -6        | -6        | -7        | -6        | 0                        | 0         | 0         | 0         | 0         | 0                        | 0         | 0         | 0         | 0         | 0                | 0         | 0         | 0         | 0         |
| Saint Kitts and Nevis     | 0                      | 0         | 0         | 0         | 0         | 0                        | 0         | 0         | 0         | 0         | 0                        | 0         | 0         | 0         | 0         | 0                | 0         | 0         | 0         | 0         |
| Saint Lucia               | 0                      | 0         | 0         | 0         | 0         | 0                        | 0         | 0         | 0         | 0         | 0                        | 0         | 0         | 0         | 0         | 0                | 0         | 0         | 0         | 0         |
| Saint Vincent and Grenad. | 0                      | 0         | 0         | 0         | 0         | 0                        | 0         | 0         | 0         | 0         | 0                        | 0         | 0         | 0         | 0         | 0                | 0         | 0         | 0         | 0         |
| Samoa                     | -1                     | -1        | -1        | -1        | -1        | 0                        | 0         | 0         | 0         | 0         | 0                        | 0         | 0         | 0         | 0         | 0                | 0         | 0         | 0         | 0         |
| San Marino                | 0                      | 0         | 0         | 0         | 0         | 0                        | 0         | 0         | 0         | 0         | 0                        | 0         | 0         | 0         | 0         | 0                | 0         | 0         | 0         | 0         |
| Sao Tome and Principe     | 0                      | 0         | 0         | 0         | 0         | 0                        | 0         | 0         | 0         | 0         | 0                        | 0         | 0         | 0         | 0         | 0                | 0         | 0         | 0         | 0         |
| Saudi Arabia              | -6                     | -8        | -9        | -9        | -8        | 0                        | 0         | 0         | 0         | 0         | 0                        | 0         | 0         | 0         | 0         | 0                | 0         | 0         | 0         | 0         |
| Senegal                   | -10                    | -13       | -12       | -12       | -12       | 0                        | 0         | 0         | 0         | 0         | 0                        | 0         | 0         | 0         | 0         | -3               | 0         | 0         | 0         | -1        |
| Serbia                    | -13                    | -14       | -17       | -18       | -15       | 0                        | 0         | 0         | 0         | 0         | 0                        | 0         | 0         | 0         | 0         | 0                | 0         | 0         | 0         | 0         |
| Seychelles                | -1                     | -1        | -1        | -1        | -1        | 0                        | 0         | 0         | 0         | 0         | 0                        | 0         | 0         | 0         | 0         | 0                | 0         | 0         | 0         | 0         |
| Sierra Leone              |                        |           |           |           |           |                          |           |           |           |           | 0                        | 0         | 0         | 0         | 0         | 0                | 0         | 0         | 0         | 0         |
| Singapore                 | 0                      | 0         | 0         | 0         | 0         | 0                        | 0         | 0         | 0         | 0         | 0                        | 0         | 0         | 0         | 0         | 0                | 0         | 0         | 0         | 0         |
| Slovakia                  | -8                     | -6        | -6        | -5        | -7        | 0                        | 0         | 0         | 0         | 0         | 0                        | 0         | 0         | 0         | 0         | -1               | -1        | -1        | -1        | -1        |
| Slovenia                  | -7                     | -7        | -4        | 1         | -5        | 0                        | 0         | 0         | 0         | 0         | 0                        | 0         | 0         | 0         | 0         | -1               | 0         | 0         | 0         | 0         |
| Solomon Islands           | 2                      | 6         | 10        | 16        | 8         | 0                        | 1         | 0         | 0         | 0         | 0                        | 0         | 0         | 0         | 0         | 0                | 0         | 0         | 0         | 0         |
| Somalia                   | -1                     | -2        | -2        | -2        | -2        | -2                       | 12        | 31        | 39        | 19        | 0                        | 0         | 0         | 0         | 0         | 0                | 0         | 0         | 0         | 0         |
| South Africa              | -12                    | -7        | -18       | -31       | -17       | 16                       | 16        | 16        | 15        | 16        | 0                        | 0         | 0         | 0         | 0         | -16              | -16       | -14       | -15       | -15       |
| South Sudan               | 0                      | 0         | 0         | 0         | 0         | 0                        | 0         | 0         | 0         | 0         | 0                        | 0         | 0         | 0         | 0         | 0                | 0         | 0         | 0         | 0         |
| Spain                     | -40                    | -38       | -37       | -36       | -38       | 0                        | 1         | 1         | 1         | 1         | 0                        | 0         | 0         | 0         | 0         | -1               | -1        | -1        | -3        | -1        |
| Sri Lanka                 | 0                      | 0         | 0         | 0         | 0         | 4                        | 4         | 4         | 4         | 4         | 0                        | 0         | 0         | 0         | 0         | 0                | 0         | 0         | 0         | 0         |
| Sudan                     | -14                    | -14       | -14       | -14       | -14       | 24                       | 24        | 24        | 24        | 24        | 0                        | 0         | 0         | 0         | 0         | 0                | 0         | 0         | 0         | 0         |
| Suriname                  | 2                      | 2         | 4         | 7         | 4         | 3                        | 4         | 7         | 7         | 5         | 0                        | 0         | 0         | 0         | 0         | 0                | 0         | 0         | 0         | 0         |
| Swaziland                 | -4                     | -4        | -4        | -4        | -4        | 0                        | 0         | 0         | 0         | 0         | 0                        | 0         | 0         | 0         | 0         | 0                | 0         | 0         | 0         | 0         |
| Sweden                    | -55                    | -52       | -52       | -51       | -53       | 2                        | 3         | 3         | 3         | 3         | 9                        | 9         | 8         | 8         | 9         | 1                | 1         | 1         | 2         | 1         |
| Switzerland               | -2                     | -3        | -3        | -3        | -3        | 1                        | 1         | 1         | 1         | 1         | 1                        | 1         | 1         | 1         | 1         | 0                | 0         | 0         | 0         | 0         |
| Syrian Arab Republic      | 0                      | 0         | 0         | 0         | 0         | 0                        | 0         | 0         | 0         | 0         | 0                        | 0         | 0         | 0         | 0         | 0                | 0         | 0         | 0         | 0         |
| Tajikistan                | -1                     | -2        | -2        | -2        | -2        | 0                        | 0         | 0         | 0         | 0         | 0                        | 0         | 0         | 0         | 0         | 0                | 0         | 0         | 0         | 0         |
| Thailand                  | -32                    | -32       | -32       | -32       | -32       | 15                       | 15        | 15        | 15        | 15        | 0                        | 0         | 0         | 0         | 0         | 0                | 0         | 0         | 0         | 0         |
| Macedonia                 | -1                     | -1        | -1        | -3        | -2        | 0                        | 0         | 0         | 0         | 0         | 0                        | 0         | 0         | 0         | 0         | 0                | 0         | 0         | 0         | 0         |
| Timor-Leste               | 0                      | -2        | -2        | -1        | -1        | 1                        | 1         | 1         | 1         | 1         | 0                        | 0         | 0         | 0         | 0         | 0                | 0         | 0         | 0         | 0         |
| Togo                      | 0                      | 0         | 0         | 0         | 0         | 1                        | 1         | 1         | 1         | 1         | 0                        | 0         | 0         | 0         | 0         | 0                | 0         | 0         | 0         | 0         |
| Tonga                     | -2                     | -2        | -2        | -2        | -2        | 0                        | 0         | 0         | 0         | 0         | 0                        | 0         | 0         | 0         | 0         | 0                | 0         | 0         | 0         | 0         |
| Trinidad and Tobago       | -2                     | -2        | -2        | -2        | -2        | 0                        | 0         | 0         | 0         | 0         | 0                        | 0         | 0         | 0         | 0         | 0                | 0         | 0         | 0         | 0         |
| Tunisia                   | -2                     | -2        | -3        | -3        | -2        | 8                        | 9         | 11        | 11        | 10        | 0                        | 0         | 0         | 0         | 0         | -4               | -4        | -4        | -4        | -4        |
| Turkey                    | -70                    | -75       | -83       | -94       | -80       | 1                        | 2         | 2         | 2         | 1         | 0                        | 0         | 0         | 0         | 0         | 0                | 0         | 1         | 1         | 0         |
| Turkmenistan              | -1                     | -1        | -1        | -1        | -1        | 0                        | 0         | 0         | 0         | 0         | 0                        | 0         | 0         | 0         | 0         | 0                | 0         | 0         | 0         | 0         |
| Tuvalu                    | 0                      | 0         | 0         | 0         | 0         | 0                        | 0         | 0         | 0         | 0         | 0                        | 0         | 0         | 0         | 0         | 0                | 0         | 0         | 0         | 0         |
| Uganda                    | 16                     | 23        | 35        | 40        | 28        | 13                       | 13        | 13        | 13        | 13        | 0                        | 0         | 0         | 0         | 0         | 0                | 0         | 0         | 0         | 0         |
| Ukraine                   | -62                    | -55       | -53       | -52       | -56       | 0                        | 0         | 0         | 0         | 0         | 5                        | 3         | 3         | 3         | 3         | 15               | 21        | 39        | 47        | 29        |
| United Arab Emirates      | -11                    | -12       | -9        | -8        | -10       | 0                        | 0         | 0         | 0         | 0         | 0                        | 0         | 0         | 0         | 0         | 0                | 0         | 0         | 0         | 0         |
| United Kingdom            | -22                    | -22       | -21       | -20       | -21       | 1                        | 1         | 1         | 1         | 1         | 13                       | 12        | 12        | 12        | 12        | 11               | 8         | 7         | 6         | 8         |
| United Rep. of Tanzania   | 0                      | 0         | 0         | 0         | 0         | 77                       | 77        | 77        | 77        | 77        | 0                        | 0         | 0         | 0         | 0         | 0                | 0         | 0         | 0         | 0         |
| United States of America  | -790                   | -778      | -779      | -794      | -785      | 122                      | 124       | 125       | 125       | 124       | 44                       | 43        | 44        | 45        | 44        | -211             | -200      | -201      | -196      | -202      |
| Uruguay                   | -                      |           |           |           |           |                          |           |           |           |           |                          |           |           |           |           |                  |           |           |           |           |

**Supplementary table 7.** Non-Annex I countries: LULUCF in NCs and BURs (original, not gap-filled data) in our NGHGI DB. Data refer to the latest NC or BUR submission available on February 2022.

|                          | Non-Annex I countries: LULUCF in National Comm. and Biennial Update Reports, original not gap-filled data<br>in our NGHGI DB, Mt CO <sub>2</sub> /yr |      |      |       |       |       |       |       |       |       |       |      |      |      |       |      |      |      |      |      | Aver.<br>2000-<br>2020 | year of<br>subm. |
|--------------------------|------------------------------------------------------------------------------------------------------------------------------------------------------|------|------|-------|-------|-------|-------|-------|-------|-------|-------|------|------|------|-------|------|------|------|------|------|------------------------|------------------|
|                          | 2000                                                                                                                                                 | 2001 | 2002 | 2003  | 2004  | 2005  | 2006  | 2007  | 2008  | 2009  | 2010  | 2011 | 2012 | 2013 | 2014  | 2015 | 2016 | 2017 | 2018 | 2019 | 2020                   |                  |
| Afghanistan              |                                                                                                                                                      |      |      |       |       | 9     |       |       |       |       |       |      |      |      |       |      |      |      |      |      | 9                      | 2019             |
| Albania                  | 4                                                                                                                                                    | 4    | 3    | 3     | 3     | 3     | 3     | 3     | 3     | 2     |       |      |      |      |       |      |      |      |      |      | 3                      | 2021             |
| Algeria                  | -8                                                                                                                                                   |      |      |       |       |       |       |       |       |       |       |      |      |      |       |      |      |      |      |      | -8                     | 2020             |
| Andorra                  | 0                                                                                                                                                    |      |      |       |       | 0     |       |       |       |       | 0     | 0    | 0    | 0    | 0     | 0    | 0    | 0    | 0    | 0    | 0                      | 2021             |
| Angola                   |                                                                                                                                                      |      |      |       |       | 40    | 40    | 40    | 40    | 40    | 40    | 71   | 70   | 70   | 70    | 70   | 70   | 70   | 70   |      | 57                     | 2021             |
| Antigua and Barbuda      |                                                                                                                                                      |      |      |       |       |       |       |       |       |       |       |      |      |      |       |      |      |      |      |      |                        | 2020             |
| Argentina                | 85                                                                                                                                                   | 83   | 97   | 99    | 105   | 94    | 110   | 115   | 91    | 68    | 69    | 57   | 93   | 89   | 62    | 40   | 31   | 41   | 39   |      | 77                     | 2021             |
| Armenia                  | -2                                                                                                                                                   | -2   | -2   | -2    | -2    | -2    | -2    | -2    | -2    | -2    | -2    | -2   | -2   | -2   | -2    | -2   | -2   |      |      |      | -2                     | 2020             |
| Azerbaijan               | -3                                                                                                                                                   | -3   | -3   | -3    | -3    | -3    | -3    | -3    | -3    | -3    | -3    | -3   | -3   | -3   | -3    |      |      |      |      |      | -3                     | 2021             |
| Bahamas                  | -4                                                                                                                                                   |      |      |       |       |       |       |       |       |       |       |      |      |      |       |      |      |      |      |      | -4                     | 2015             |
| Bahrain                  |                                                                                                                                                      |      |      |       |       | 0     |       |       |       |       |       |      |      |      |       |      |      |      |      |      | 0                      | 2020             |
| Bangladesh               | 33                                                                                                                                                   |      |      |       |       | 23    |       |       |       |       |       |      | 11   |      |       |      |      |      |      |      | 22                     | 2018             |
| Barbados                 | 0                                                                                                                                                    | 0    | 0    | 0     | 0     | 0     | 0     | 0     | 0     | 0     | 0     |      |      |      |       |      | -6   |      | -7   |      | 0                      | 2018             |
| Belize                   | -8                                                                                                                                                   |      |      | -12   |       |       | -11   |       |       | -10   |       |      | -8   |      |       |      |      |      |      |      | -9                     | 2021             |
| Benin                    | -3                                                                                                                                                   |      |      |       |       | -1    |       |       |       | -5    | -4    | -4   | -4   | -4   | -4    |      |      |      |      |      | -4                     | 2019             |
| Bhutan                   | -7                                                                                                                                                   | -8   | -8   | -9    | -9    | -8    | -8    | -6    | -8    | -9    | -8    | -8   | -8   | -8   | -6    | -8   |      |      |      |      | -8                     | 2021             |
| Bolivia                  |                                                                                                                                                      |      |      |       |       | 41    |       | 36    |       |       |       |      |      |      |       |      |      |      |      |      | 38                     | 2020             |
| Bosnia and Herzegovina   |                                                                                                                                                      | -7   | -5   | -5    | -7    | -7    | -7    | -8    | -7    | -8    | -6    | -6   | -8   | -6   | -6    |      |      |      |      |      | -7                     | 2017             |
| Botswana                 |                                                                                                                                                      |      |      |       |       |       |       |       |       |       |       |      |      |      |       | -3   |      |      |      |      | -3                     | 2019             |
| Brazil                   | 1110                                                                                                                                                 | 1058 | 1257 | 2297  | 2482  | 1480  | 1134  | 794   | 899   | 284   | 220   | 300  | 155  | 354  | 214   | 335  | 365  |      |      |      | 867                    | 2020             |
| Brunei Darussalam        |                                                                                                                                                      |      |      |       |       |       |       |       |       |       | -3    | -3   | -3   | -3   | -3    |      |      |      |      |      | -3                     | 2017             |
| Burkina Faso             |                                                                                                                                                      |      |      |       |       |       | 34    | 34    | 37    | 37    | 37    | 38   | 38   | 38   | 38    | 44   | 44   | 44   |      |      | 39                     | 2021             |
| Burundi                  |                                                                                                                                                      |      |      |       |       | -4    |       |       |       |       | -1    |      |      |      |       |      | -1   |      |      |      | -2                     | 2019             |
| Cambodia                 | 27                                                                                                                                                   |      |      |       |       | 27    |       |       |       |       | 131   |      |      |      |       |      | 131  | 131  |      |      | 89                     | 2020             |
| Cameroon                 | -77                                                                                                                                                  |      |      |       |       |       |       |       |       |       |       |      |      |      |       |      |      |      |      |      | -77                    | 2016             |
| Cape Verde               | 0                                                                                                                                                    |      |      |       |       | 0     |       |       |       |       | 0     |      |      |      |       |      |      |      |      |      | 0                      | 2018             |
| Central African Republic |                                                                                                                                                      |      |      | -1674 | -1736 | -1736 | -1736 | -1736 | -1736 | -1736 | -1736 |      |      |      |       |      |      |      |      |      | -1729                  | 2015             |
| Chad                     | -24                                                                                                                                                  | -23  | -21  | -14   |       |       |       |       |       |       |       |      |      |      |       |      |      |      |      |      | -20                    | 2013             |
| Chile                    | -73                                                                                                                                                  | -75  | -62  | -78   | -73   | -73   | -77   | -63   | -64   | -67   | -77   | -76  | -68  | -78  | -66   | -57  | -75  | -12  | -68  |      | -67                    | 2021             |
| China                    |                                                                                                                                                      |      |      |       |       | -803  |       |       |       |       | -1030 |      | -576 |      | -1151 |      |      |      |      |      | -890                   | 2019             |
| Colombia                 | 98                                                                                                                                                   | 78   | 78   | 89    | 89    | 88    | 75    | 81    | 75    | 68    | 69    | 73   | 71   | 60   | 64    |      |      |      |      |      | 77                     | 2019             |
| Comoros                  | -4                                                                                                                                                   |      |      |       |       |       |       |       |       |       |       |      |      |      |       |      |      |      |      |      | -4                     | 2013             |
| Congo                    | -82                                                                                                                                                  |      |      |       |       |       |       |       |       |       |       |      |      |      |       |      |      |      |      |      | -82                    | 2009             |
| Cook Islands             |                                                                                                                                                      |      |      |       |       | 0     |       |       |       |       |       |      |      |      |       |      |      |      |      |      | 0                      | 2020             |
| Costa Rica               | 19                                                                                                                                                   | 5    | 5    | 4     | 5     | 5     | 5     | 6     | 2     | 2     | 2     | 2    | 5    | 5    | -1    | 0    | -1   | -3   |      |      | 4                      | 2021             |
| Cote d'Ivoire            | 49                                                                                                                                                   |      |      |       |       | 7     |       |       |       |       | 20    | 22   | 27   | 35   | 31    |      |      |      |      |      | 27                     | 2018             |
| Cuba                     | 18                                                                                                                                                   |      |      |       |       |       |       |       |       |       | -24   |      | -24  |      | -26   |      |      | -27  | -27  | -27  | -27                    | 2020             |
| Dem. Rep. Korea          | -17                                                                                                                                                  |      | -17  |       |       |       |       |       |       |       |       |      |      |      |       |      |      |      |      |      | -17                    | 2013             |
| Dem. Rep. Congo (DRC)    | -120                                                                                                                                                 | -109 | -97  | -85   | -73   | -77   | -76   | -63   | -38   | -25   | -11   |      |      |      |       |      |      |      |      |      | -70                    | 2015             |
| Djibouti                 | -2                                                                                                                                                   |      |      |       |       |       |       |       |       |       |       |      |      |      |       |      |      |      |      |      | -2                     | 2021             |
| Dominica                 | 0                                                                                                                                                    | 0    | 0    | 0     | 0     | 0     |       |       |       |       |       |      |      |      |       |      |      | -3   |      |      | -1                     | 2020             |
| Dominican Republic       | 19                                                                                                                                                   |      |      |       |       |       |       |       |       |       | -3    |      |      |      |       |      |      |      |      |      | 8                      | 2020             |
| Ecuador                  | 41                                                                                                                                                   |      |      |       |       |       | 34    |       |       |       | 24    |      | 20   |      |       |      |      |      |      |      | 30                     | 2017             |
| Egypt                    |                                                                                                                                                      |      |      |       |       |       |       |       |       |       |       |      |      |      |       |      |      |      |      |      |                        | 2019             |
| El Salvador              |                                                                                                                                                      |      |      |       |       |       |       |       |       |       |       |      |      |      | 9     |      |      |      |      |      | 9                      | 2018             |
| Equatorial Guinea        |                                                                                                                                                      |      |      |       |       |       |       |       |       |       |       |      |      | -9   |       |      |      |      |      |      | -9                     | 2019             |
| Eritrea                  | 0                                                                                                                                                    |      |      |       |       | 0     |       |       |       |       | 0     |      |      |      |       | 0    |      |      |      |      | 0                      | 2021             |
| Ethiopia                 | 103                                                                                                                                                  | 118  | 109  | 112   | 62    | 61    | 62    | 62    | 77    | 72    | 77    | 102  | 30   | 33   |       |      |      |      |      |      | 77                     | 2016             |
| Fiji                     |                                                                                                                                                      |      |      |       |       |       | 0     | 0     | 1     | 0     | 1     |      |      |      |       |      |      |      |      |      | 0                      | 2020             |
| Gabon                    | -98                                                                                                                                                  |      |      |       |       | -105  |       |       |       |       | -121  | -117 | -118 | -115 | -114  | -115 | -113 | -109 | -109 |      | -112                   | 2022             |
| Gambia                   |                                                                                                                                                      |      |      |       |       |       |       |       |       |       |       |      |      |      |       |      |      |      |      |      | 1                      | 2021             |
| Georgia                  | -5                                                                                                                                                   | -5   | -5   | -4    | -4    | -4    | -4    | -4    | -4    | -5    | -5    | -5   | -5   | -5   | -5    | -5   | -5   | -5   |      |      | -5                     | 2021             |
| Ghana                    | 13                                                                                                                                                   | 13   | 14   | 13    | 13    | 13    | 13    | 13    | 13    | 13    | 13    | 13   | 13   | 13   | 13    | 13   | 13   |      |      |      | 13                     | 2021             |
| Grenada                  | 0                                                                                                                                                    | 0    | 0    | 0     | 1     | 1     | 0     | 0     | 0     | 0     | 0     |      |      |      |       |      |      |      |      |      | 0                      | 2019             |
| Guatemala                | -24                                                                                                                                                  |      |      |       |       | -8    |       |       |       |       |       |      |      |      |       |      |      |      |      |      | -16                    | 2016             |
| Guinea                   | -437                                                                                                                                                 |      |      |       |       | -435  |       |       |       |       | -434  |      |      |      |       | -432 |      |      |      |      | -434                   | 2018             |
| Guinea Bissau            |                                                                                                                                                      |      |      |       |       |       |       |       |       |       |       |      |      | -1   |       |      |      |      |      |      | -1                     | 2020             |
| Guyana                   | -56                                                                                                                                                  | -56  | -56  | -55   | -55   |       |       |       |       |       |       |      |      |      |       |      |      |      |      |      | -56                    | 2012             |
| Haiti                    | 1                                                                                                                                                    |      |      |       |       |       |       |       |       |       |       |      |      |      |       |      |      |      |      |      | 1                      | 2013             |
| Honduras                 |                                                                                                                                                      |      |      |       |       | -8    | -8    | -5    | -5    | -5    | -5    | -5   | -5   | -5   | -5    | -5   |      |      |      |      | -6                     | 2020             |
| India                    |                                                                                                                                                      |      |      |       |       |       |       |       |       |       |       | -211 | -364 | -365 | -301  | -296 | -308 |      |      |      | -307                   | 2021             |
| Indonesia                | 532                                                                                                                                                  | -48  | 174  | -25   | 350   | 400   | 1145  | 300   | 229   | 607   | 160   | 258  | 647  | 503  | 862   | 1566 | 508  | 489  | 724  | 925  | 515                    | 2021             |
| Iran                     |                                                                                                                                                      |      |      |       |       |       |       |       |       |       | 22    |      |      |      |       |      |      |      |      |      | 22                     | 2018             |
| Iraq                     |                                                                                                                                                      |      |      |       |       |       |       |       |       |       |       |      |      |      |       |      |      |      |      |      |                        | 2017             |
| Israel                   | 0                                                                                                                                                    |      |      | 0     | 0     | 0     | 0     | 0     | 0     | 0     | 0     | 0    | 0    | 0    | 0     | 0    | 0    | 0    |      |      | 0                      | 2018             |
| Jamaica                  |                                                                                                                                                      |      |      |       |       |       | -2    | -2    | -2    | -2    | -2    | -2   | -2   |      |       |      |      |      |      |      | -2                     | 2019             |
| Jordan                   |                                                                                                                                                      |      |      |       |       |       |       |       |       |       |       |      |      |      |       |      | -1   |      |      |      | -1                     | 2021             |
| Kenya                    | 17                                                                                                                                                   | 16   | 16   | 16    | 16    | 16    | 20    | 20    | 20    | 20    | 20    |      |      |      |       |      |      |      |      |      | 18                     | 2015             |
| Kiribati                 |                                                                                                                                                      |      |      |       |       |       |       |       |       |       |       |      |      |      |       |      |      |      |      |      |                        | 2013             |
| Kuwait                   |                                                                                                                                                      |      |      |       |       |       |       |       |       |       |       |      |      |      |       |      |      |      |      |      |                        | 2019             |
| Kyrgyzstan               | 0                                                                                                                                                    | 0    | 0    | 0     | 0     | 0     | 0     | 0     | 0     | 0     | 0     |      |      |      |       |      |      |      |      |      | 0                      | 2017             |
| Lao People's Dem. Rep.   |                                                                                                                                                      |      |      |       |       |       |       |       |       |       |       |      |      |      | 9     |      |      |      |      |      | 9                      | 2020             |
| Lebanon                  | -2                                                                                                                                                   | -3   | -3   | -2    | -3    | -2    | -2    | -2    | -2    | -2    | -2    | -2   | -2   | -2   | -2    | -2   | -3   | -3   | -3   |      | -2                     | 2021             |
| Lesotho                  |                                                                                                                                                      |      |      |       |       | 8     | 8     | 8     | 7     | 7     | 7     |      |      |      |       |      |      |      |      |      | 8                      | 2021             |
| Liberia                  |                                                                                                                                                      |      |      |       |       |       |       |       |       |       |       |      |      |      |       | -21  |      |      |      |      | -21                    | 2021             |
| Libya                    |                                                                                                                                                      |      |      |       |       |       |       |       |       |       |       |      |      |      |       |      |      |      |      |      |                        | 2021             |
| Madagascar               |                                                                                                                                                      |      |      |       |       | -158  | -169  | -174  | -171  | -167  | -96   |      |      |      |       |      |      |      |      |      | -156                   | 2017             |

Supplementary table 7 (continues)

|                           | Non-Annex I countries: LULUCF in National Comm. and Biennial Update Reports, original not gap-filled data<br>in our NGHGI DB, Mt CO2/yr |      |      |      |      |      |      |      |      |      |      |      |      |      |      |      |      |      |      |      | Aver.<br>2000-<br>2020 | year of<br>subm. |      |
|---------------------------|-----------------------------------------------------------------------------------------------------------------------------------------|------|------|------|------|------|------|------|------|------|------|------|------|------|------|------|------|------|------|------|------------------------|------------------|------|
|                           | 2000                                                                                                                                    | 2001 | 2002 | 2003 | 2004 | 2005 | 2006 | 2007 | 2008 | 2009 | 2010 | 2011 | 2012 | 2013 | 2014 | 2015 | 2016 | 2017 | 2018 | 2019 | 2020                   |                  |      |
| Malawi                    |                                                                                                                                         |      |      |      |      |      |      |      |      |      | -1   |      |      |      |      |      |      |      |      |      |                        | -1               | 2021 |
| Malaysia                  | -182                                                                                                                                    |      |      |      |      | -199 |      |      |      |      |      | -241 |      |      | -265 |      | -242 |      |      |      |                        | -226             | 2018 |
| Maldives                  |                                                                                                                                         |      |      |      |      |      |      |      |      |      |      |      |      |      |      |      |      |      |      |      |                        |                  | 2020 |
| Mali                      | -259                                                                                                                                    |      |      |      |      |      |      | -259 | -255 | -213 | -245 | -272 | -241 | -259 | -155 |      |      |      |      |      |                        | -240             | 2018 |
| Marshall Islands          |                                                                                                                                         |      |      |      |      |      |      |      |      |      |      |      |      |      |      |      |      |      |      |      |                        |                  | 2015 |
| Mauritania                | -1                                                                                                                                      | -1   | -1   | -1   | -1   | -1   | -1   | -1   | -1   | -1   | -1   | -1   | -1   | -1   | -1   | -1   | -1   | -1   | -1   |      |                        | -1               | 2021 |
| Mauritius                 | 0                                                                                                                                       | 0    | 0    | 0    | 0    | 0    | 0    |      |      |      |      |      |      |      |      |      |      |      |      |      |                        | 0                | 2021 |
| Mexico                    |                                                                                                                                         |      |      |      |      | -151 |      |      |      |      | -147 |      |      |      |      | -148 |      |      |      |      |                        | -149             | 2019 |
| Micronesia                |                                                                                                                                         |      |      |      |      |      |      |      |      |      | -1   |      |      |      |      |      |      |      |      |      |                        | -1               | 2015 |
| Monolia                   | -25                                                                                                                                     | -26  | -26  | -25  | -26  | -26  | -25  | -25  | -25  | -25  | -25  | -25  | -25  | -25  | -25  |      |      |      |      |      |                        | -25              | 2018 |
| Montenegro                | -2                                                                                                                                      | -3   | -3   | -3   | -3   | -2   | -2   | -2   | -2   | -3   | -3   | -1   | -2   | -2   | -3   | -2   | -2   | -2   | -2   | -3   |                        | -2               | 2022 |
| Morocco                   | -2                                                                                                                                      | -2   | -2   | -2   | -2   | -2   | -2   | -2   | -2   | -2   | -2   | -2   | -2   | -2   | -2   |      |      |      |      |      |                        | -2               | 2021 |
| Mozambique                |                                                                                                                                         |      |      |      |      |      |      |      |      |      |      |      |      |      |      |      |      |      |      |      |                        |                  | 2006 |
| Myanmar                   | -102                                                                                                                                    | -101 | -99  | -98  | -97  | -96  |      |      |      |      |      |      |      |      |      |      |      |      |      |      |                        | -99              | 2012 |
| Namibia                   | -100                                                                                                                                    | -100 | -104 | -105 | -107 | -104 | -101 | -98  | -107 | -95  | -99  | -96  | -95  | -113 | -110 | -112 | -117 |      |      |      |                        | -104             | 2021 |
| Nauru                     |                                                                                                                                         |      |      |      |      |      |      |      |      |      |      |      |      |      |      |      |      |      |      |      |                        |                  | 2015 |
| Nepal                     |                                                                                                                                         |      |      |      |      |      |      |      |      |      |      | -16  |      |      |      |      |      |      |      |      |                        | -16              | 2021 |
| Nicaragua                 | 43                                                                                                                                      |      |      |      |      | 9    |      |      |      |      | 2    |      |      |      |      |      |      |      |      |      |                        | 18               | 2018 |
| Niger                     | -35                                                                                                                                     |      |      |      |      |      |      |      | -35  |      |      |      |      |      |      |      |      |      |      |      |                        | -35              | 2017 |
| Nigeria                   | 251                                                                                                                                     | 254  | 257  | 261  | 265  | 269  | 272  | 276  | 278  | 283  | 287  | 290  | 295  | 298  | 303  | 308  | 311  | 315  |      |      |                        | 282              | 2021 |
| Niue                      |                                                                                                                                         |      |      |      |      |      |      |      |      | 0    |      |      |      |      |      |      |      |      |      |      |                        | 0                | 2016 |
| Oman                      |                                                                                                                                         |      |      |      |      |      |      |      |      |      |      |      |      |      |      |      |      |      |      |      |                        |                  | 2019 |
| Pakistan                  | 3                                                                                                                                       | 3    | 3    | 3    | 3    | 3    | 3    | 3    | 3    | 3    | 3    | 3    | 3    | 3    | 3    | 3    | 3    | 3    | 3    | 3    | 3                      | 3                | 2019 |
| Palau                     | 0                                                                                                                                       | 0    | 0    | 0    | 0    | 0    |      |      |      |      |      |      |      |      |      |      |      |      |      |      |                        | 0                | 2019 |
| Panama                    |                                                                                                                                         |      |      |      |      | -5   |      |      |      |      | -5   |      |      |      |      |      |      |      |      |      |                        | -5               | 2021 |
| Papua New Guinea          | -22                                                                                                                                     | -22  | -13  | -14  | -11  | -18  | -13  | -10  | -9   | -5   | 0    | 2    | -2   | 4    | 1    | 2    |      |      |      |      |                        | -8               | 2019 |
| Paraguay                  | 36                                                                                                                                      | 31   | 30   | 30   | 30   | 32   | 37   | 38   | 42   | 35   | 35   | 35   | 47   | 46   | 17   | 16   |      |      |      |      |                        | 33               | 2021 |
| Peru                      | 107                                                                                                                                     |      |      |      |      | 121  |      |      |      |      | 90   |      | 87   |      | 76   |      |      |      |      |      |                        | 96               | 2019 |
| Philippines               | -105                                                                                                                                    |      |      |      |      |      |      |      |      |      |      |      |      |      |      |      |      |      |      |      |                        | -105             | 2014 |
| Qatar                     |                                                                                                                                         |      |      |      |      |      |      |      |      |      |      |      |      |      |      |      |      |      |      |      |                        |                  | 2011 |
| Republic of Korea         | -60                                                                                                                                     | -59  | -57  | -56  | -57  | -55  | -56  | -57  | -58  | -57  | -55  | -55  | -49  | -45  | -43  | -43  | -45  | -45  | -45  |      |                        | -53              | 2021 |
| Republic of Moldova       | 1                                                                                                                                       | 1    | 1    | 2    | 2    | 2    | 1    | -1   | 2    | 1    | 2    | 2    | 2    | 2    | 2    | 2    |      |      |      |      |                        | 2                | 2018 |
| Rwanda                    |                                                                                                                                         |      |      |      |      | -6   | -5   | -6   | -6   | -6   | -6   | -6   | -6   | -6   | -7   | -7   | -7   | -7   | -7   |      |                        | -6               | 2021 |
| Saint Kitts and Nevis     |                                                                                                                                         |      |      |      |      |      |      |      | 0    |      |      |      |      |      |      |      |      |      |      |      |                        | 0                | 2017 |
| Saint Lucia               |                                                                                                                                         |      |      |      |      |      |      |      |      |      | 0    |      |      |      |      |      |      |      |      |      |                        | 0                | 2017 |
| Saint Vincent and Grenad. | 0                                                                                                                                       |      |      |      | 0    |      |      |      |      |      |      |      |      |      |      |      |      |      |      |      |                        | 0                | 2016 |
| Samoa                     | -1                                                                                                                                      | -1   | -1   | -1   | -1   | -1   | -1   | -1   |      |      |      |      |      |      |      |      |      |      |      |      |                        | -1               | 2010 |
| San Marino                |                                                                                                                                         |      |      |      |      |      |      | 0    |      |      | 0    |      |      |      |      |      |      |      |      |      |                        | 0                | 2013 |
| Sao Tome and Principe     |                                                                                                                                         |      |      |      |      | 0    |      |      |      |      |      |      | 0    |      |      |      |      |      |      |      |                        | 0                | 2019 |
| Saudi Arabia              | -6                                                                                                                                      |      |      |      |      |      |      |      |      |      | -9   |      | -9   |      |      |      |      |      |      |      |                        | -8               | 2018 |
| Senegal                   | -11                                                                                                                                     |      |      |      |      | -11  |      |      |      |      |      |      |      |      |      |      |      |      |      |      |                        | -11              | 2016 |
| Serbia                    | -14                                                                                                                                     |      |      |      |      | -11  |      |      |      |      | -17  | -17  | -15  | -16  | -18  |      |      |      |      |      |                        | -15              | 2017 |
| Seychelles                | -1                                                                                                                                      |      |      |      |      |      |      |      |      |      |      |      |      |      |      |      |      |      |      |      |                        | -1               | 2013 |
| Sierra Leone              |                                                                                                                                         |      |      |      |      |      |      |      |      |      |      |      |      |      |      |      |      |      |      |      |                        |                  | 2012 |
| Singapore                 |                                                                                                                                         |      |      |      |      |      |      |      |      |      |      |      | 0    |      |      |      |      |      |      |      |                        | 0                | 2018 |
| Solomon Islands           |                                                                                                                                         |      |      |      |      |      |      |      |      |      |      |      |      |      |      |      |      |      |      |      |                        |                  | 2017 |
| Somalia                   | -9                                                                                                                                      | -4   | -5   | -5   | 7    | 8    | 10   | 8    | 8    | 10   | 14   | 19   | 19   | 31   | 37   |      |      |      |      |      |                        | 10               | 2019 |
| South Africa              | -12                                                                                                                                     | -6   | -12  | -18  | -13  | 0    | -3   | -6   | 0    | -14  | -11  | -11  | -11  | -19  | -17  | -23  | -33  | -31  | -31  |      |                        | -14              | 2021 |
| Sri Lanka                 | -6                                                                                                                                      |      |      |      |      |      |      |      |      |      |      |      |      |      |      |      |      |      |      |      |                        | -6               | 2012 |
| South Sudan               | 0                                                                                                                                       |      |      |      |      | 0    |      |      |      |      | 0    |      |      |      |      | 0    |      |      |      |      |                        | 0                | 2019 |
| Sudan                     | 10                                                                                                                                      |      |      |      |      |      |      |      |      |      |      |      |      |      |      |      |      |      |      |      |                        | 10               | 2013 |
| Suriname                  |                                                                                                                                         |      |      |      |      |      |      |      | 3    |      |      |      |      |      |      |      |      |      |      |      |                        | 3                | 2016 |
| Swaziland                 | -4                                                                                                                                      |      |      |      |      |      |      |      |      |      | -3   |      |      |      |      |      |      |      |      |      |                        | -4               | 2016 |
| Syrian Arab Republic      | 0                                                                                                                                       | 0    | 0    | 0    | 0    | 0    |      |      |      |      |      |      |      |      |      |      |      |      |      |      |                        | 0                | 2010 |
| Tajikistan                |                                                                                                                                         |      |      |      | -1   | -1   | -1   | -1   | -2   | -1   | -2   | -2   | -2   | -2   | -2   |      |      |      |      |      |                        | -2               | 2019 |
| Thailand                  | -62                                                                                                                                     | -55  | -45  | -48  | -56  | -50  | -53  | -60  | -64  | -66  | -62  | -68  | -81  | -82  | -103 | -90  | -91  |      |      |      |                        | -67              | 2020 |
| Macedonia                 |                                                                                                                                         |      |      | -5   | -1   | -1   | -1   | -1   | 1    | -1   |      |      | 2    | -2   | -3   |      |      |      |      |      |                        | -1               | 1900 |
| Timor-Leste               |                                                                                                                                         |      |      |      |      | 0    | 2    | -5   | -4   | -2   | 0    | -3   | -2   | -2   | 2    | -1   |      |      |      |      |                        | -1               | 2020 |
| Togo                      | 14                                                                                                                                      | 15   | 16   | 16   | 16   | 16   | 17   | 17   | 18   | 18   | 19   | 17   | 17   | 17   | 17   | 17   |      |      |      |      |                        | 17               | 2017 |
| Tonga                     | -2                                                                                                                                      |      |      |      |      |      | -2   |      |      |      |      |      |      |      |      |      |      |      |      |      |                        | -2               | 2020 |
| Trinidad and Tobago       |                                                                                                                                         |      |      |      |      |      | -2   | -2   | -2   | -2   | -2   | -2   | -2   | -2   | -2   | -2   | -2   | -2   | -2   |      |                        | -2               | 2021 |
| Tunisia                   | 3                                                                                                                                       |      |      |      |      |      |      |      |      |      | 4    | 3    | 4    |      |      |      |      |      |      |      |                        | 4                | 2019 |
| Turkmenistan              | -1                                                                                                                                      |      |      |      | -1   |      |      |      |      |      |      |      |      |      |      |      |      |      |      |      |                        | -1               | 2016 |
| Tuvalu                    |                                                                                                                                         |      | 0    |      |      |      |      |      |      |      |      |      |      |      | 0    |      |      |      |      |      |                        | 0                | 2018 |
| Uganda                    |                                                                                                                                         |      |      |      |      | 29   |      |      |      |      | 41   |      |      |      |      | 53   |      |      |      |      |                        | 41               | 2019 |
| United Arab Emirates      | -10                                                                                                                                     |      |      |      |      | -13  |      |      |      |      |      |      |      |      | -8   |      |      |      |      |      |                        | -10              | 2019 |
| United Rep. of Tanzania   | 180                                                                                                                                     |      | 183  |      |      |      |      |      |      |      |      |      |      |      |      |      |      |      |      |      |                        | 181              | 2015 |
| Uruguay                   | -12                                                                                                                                     |      | -13  |      | -13  |      |      |      |      |      |      |      |      |      | -15  |      |      |      |      |      |                        | -13              | 2021 |
| Uzbekistan                | -6                                                                                                                                      | -7   | -8   | -8   | -9   | -10  | -10  | -11  | -12  | -12  | -13  | -13  | -13  | -11  | -13  | -12  | -11  | -9   |      |      |                        | -10              | 2021 |
| Vanuatu                   | -7                                                                                                                                      |      |      |      |      |      |      | -7   | -7   | -7   | -7   | -7   | -7   | -7   | -7   | -7   |      |      |      |      |                        | -7               | 2021 |
| Venezuela                 |                                                                                                                                         |      |      |      |      |      |      |      |      |      | -30  |      |      |      |      |      |      |      |      |      |                        | -30              | 2018 |
| Viet Nam                  |                                                                                                                                         |      |      |      |      |      |      |      |      |      |      |      |      |      |      |      | -39  |      |      |      |                        | -39              | 2021 |
| Yemen                     |                                                                                                                                         |      |      |      |      |      |      |      |      |      | -2   |      |      |      |      |      |      |      |      |      |                        | -2               | 2018 |
| Zambia                    | 25                                                                                                                                      |      |      |      |      | 29   |      |      |      |      | 41   | 42   | 42   | 43   | 45   | 46   | 47   |      |      |      |                        | 40               | 2020 |
| Zimbabwe                  | -3                                                                                                                                      |      |      |      |      |      |      |      |      |      | 16   |      |      |      |      |      |      |      |      |      |                        | 7                | 2021 |
| TOTAL                     |                                                                                                                                         |      |      |      |      |      |      |      |      |      |      |      |      |      |      |      |      |      |      |      |                        | -2714            |      |

**Supplementary table 8.** Non-Annex I countries: LULUCF in NCs and BUR (original, not gap-filled data) in the UNFCCC NGHGI DB ([https://di.unfccc.int/flex\\_non\\_annex1](https://di.unfccc.int/flex_non_annex1), downloaded on 28 February 2022).

|                          | Non-Annex I countries: LULUCF in National Comm. and Biennial Update Reports, original not gap-filled data in the UNFCCC GHG Data Interface, Mt CO <sub>2</sub> /yr |      |      |       |       |       |       |       |       |       |       |      |      |      |       |      |      |      |      |      |      | Aver. 2000-2020 |
|--------------------------|--------------------------------------------------------------------------------------------------------------------------------------------------------------------|------|------|-------|-------|-------|-------|-------|-------|-------|-------|------|------|------|-------|------|------|------|------|------|------|-----------------|
|                          | 2000                                                                                                                                                               | 2001 | 2002 | 2003  | 2004  | 2005  | 2006  | 2007  | 2008  | 2009  | 2010  | 2011 | 2012 | 2013 | 2014  | 2015 | 2016 | 2017 | 2018 | 2019 | 2020 |                 |
| Afghanistan              |                                                                                                                                                                    |      |      |       |       | 9     |       |       |       |       |       |      |      | 11   |       |      |      |      |      |      |      | 10              |
| Albania                  | 3                                                                                                                                                                  | 3    | 2    | 2     | 2     | 2     | 2     | 2     | 1     | 1     |       |      |      |      |       |      |      |      |      |      |      | 2               |
| Algeria                  | -8                                                                                                                                                                 |      |      |       |       |       |       |       |       |       |       |      |      |      |       |      |      |      |      |      |      | -8              |
| Andorra                  |                                                                                                                                                                    |      |      |       |       |       |       |       |       |       |       |      |      |      |       |      |      |      |      |      |      |                 |
| Angola                   | -3                                                                                                                                                                 |      |      |       |       | 1     |       |       |       |       |       |      |      |      |       |      |      |      |      |      |      | -1              |
| Antigua and Barbuda      | 0                                                                                                                                                                  |      |      |       |       |       |       |       |       |       |       |      |      |      |       |      |      |      |      |      |      | 0               |
| Argentina                | -44                                                                                                                                                                |      |      |       |       |       |       |       |       |       | 108   |      | 85   |      |       |      |      |      |      |      |      | 50              |
| Armenia                  | 0                                                                                                                                                                  |      |      |       |       | -1    |       |       |       |       | -1    |      |      |      |       |      |      |      |      |      |      | -1              |
| Azerbaijan               | -5                                                                                                                                                                 | -5   | -5   | -5    | -5    | -5    | -5    | -5    | -5    | -5    | -5    | -5   | -5   | -6   |       |      |      |      |      |      |      | -5              |
| Bahamas                  | -3                                                                                                                                                                 |      |      |       |       |       |       |       |       |       |       |      |      |      |       |      |      |      |      |      |      | -3              |
| Bahrain                  |                                                                                                                                                                    |      |      |       |       |       |       |       |       |       |       |      |      |      |       |      |      |      |      |      |      |                 |
| Bangladesh               |                                                                                                                                                                    | 28   |      |       |       | 18    |       |       |       |       |       |      |      |      |       |      |      |      |      |      |      | 23              |
| Barbados                 |                                                                                                                                                                    |      |      |       |       |       |       |       |       |       |       |      |      |      |       |      |      |      |      |      |      |                 |
| Belize                   | 8                                                                                                                                                                  |      |      | 4     |       |       | 4     |       |       | 5     |       |      |      |      |       |      |      |      |      |      |      | 5               |
| Benin                    | -15                                                                                                                                                                |      |      |       |       |       |       |       |       |       |       |      |      |      |       |      |      |      |      |      |      | -15             |
| Bhutan                   | -6                                                                                                                                                                 |      |      |       |       |       |       |       |       |       |       |      |      |      |       |      |      |      |      |      |      | -7              |
| Bolivia                  | 26                                                                                                                                                                 |      | 32   |       | 36    |       |       |       |       |       |       |      |      |      |       |      | -8   |      |      |      |      | 31              |
| Bosnia and Herzegovina   | -7                                                                                                                                                                 | -7   |      |       |       |       |       |       |       |       |       |      |      |      | -6    | -6   |      |      |      |      |      | -7              |
| Botswana                 | -43                                                                                                                                                                |      |      |       |       |       |       |       |       |       |       |      |      |      |       |      | -28  |      |      |      |      | -35             |
| Brazil                   | 1134                                                                                                                                                               | 1130 | 1339 | 2218  | 2407  | 1456  | 1065  | 782   | 882   | 295   | 261   | 176  | 48   | 231  | 104   | 214  | 269  |      |      |      |      | 824             |
| Brunei Darussalam        |                                                                                                                                                                    |      |      |       |       |       |       |       |       |       | -3    |      |      |      |       |      |      |      |      |      |      | -3              |
| Burkina Faso             |                                                                                                                                                                    |      |      |       |       |       |       |       |       |       |       |      |      |      |       |      |      |      |      |      |      |                 |
| Burundi                  |                                                                                                                                                                    |      |      |       |       | -4    |       |       |       |       | -2    |      |      |      |       |      | -1   |      |      |      |      | -3              |
| Cambodia                 | -25                                                                                                                                                                |      |      |       |       |       |       |       |       |       |       |      |      |      |       |      |      |      |      |      |      | -25             |
| Cameroon                 | -77                                                                                                                                                                |      |      |       |       |       |       |       |       |       |       |      |      |      |       |      |      |      |      |      |      | -77             |
| Cape Verde               | 0                                                                                                                                                                  |      |      |       |       |       |       |       |       |       |       |      |      |      |       |      |      |      |      |      |      | 0               |
| Central African Republic |                                                                                                                                                                    |      |      | -1767 | -1767 | -1767 | -1767 | -1767 | -1767 | -1767 | -1767 |      |      |      |       |      |      |      |      |      |      | -1767           |
| Chad                     | -45                                                                                                                                                                | -45  | -44  | -38   |       |       |       |       |       |       |       |      |      |      |       |      |      |      |      |      |      | -43             |
| Chile                    | -73                                                                                                                                                                |      |      |       |       |       | -21   |       |       |       | -77   |      |      |      | -78   |      | -75  |      | -64  |      |      | -65             |
| China                    |                                                                                                                                                                    |      |      |       |       | -803  |       |       |       |       | -1030 |      | -576 |      | -1151 |      |      |      |      |      |      | -890            |
| Colombia                 | 30                                                                                                                                                                 |      |      |       | 26    |       |       |       |       |       |       |      |      |      |       |      |      |      |      |      |      | 28              |
| Comoros                  | -3                                                                                                                                                                 |      |      |       |       |       |       |       |       |       |       |      |      |      |       |      |      |      |      |      |      | -3              |
| Congo                    | -83                                                                                                                                                                |      |      |       |       |       |       |       |       |       |       |      |      |      |       |      |      |      |      |      |      | -83             |
| Cook Islands             |                                                                                                                                                                    |      |      |       |       |       |       |       |       |       |       |      |      |      |       |      |      |      |      |      |      |                 |
| Costa Rica               | -3                                                                                                                                                                 |      |      |       |       | -4    |       |       |       |       |       |      |      |      |       |      |      |      |      |      |      | -3              |
| Cote d'Ivoire            | -20                                                                                                                                                                |      |      |       |       |       |       |       |       |       |       |      |      |      |       |      |      |      |      |      |      | -20             |
| Cuba                     | -13                                                                                                                                                                |      | -13  |       |       |       |       |       |       |       |       |      |      |      |       |      |      |      |      |      |      | -13             |
| Dem. Rep. Korea          | -17                                                                                                                                                                |      | -17  |       |       |       |       |       |       |       |       |      |      |      |       |      |      |      |      |      |      | -17             |
| Dem. Rep. Congo (DRC)    | -349                                                                                                                                                               | -356 | -179 | -182  |       |       |       |       |       |       |       |      |      |      |       |      |      |      |      |      |      | -266            |
| Djibouti                 | -7                                                                                                                                                                 |      |      |       |       |       |       |       |       |       |       |      |      |      |       |      |      |      |      |      |      | -7              |
| Dominica                 | 0                                                                                                                                                                  | 0    | 0    | 0     | 0     | 0     |       |       |       |       |       |      |      |      |       |      |      | -3   |      |      |      | -1              |
| Dominican Republic       | -19                                                                                                                                                                |      |      |       |       |       |       |       |       |       | -3    |      |      |      |       |      |      |      |      |      |      | -11             |
| Ecuador                  |                                                                                                                                                                    |      |      |       |       |       |       |       |       |       | 24    |      | 20   |      |       |      |      |      |      |      |      | 22              |
| Egypt                    |                                                                                                                                                                    |      |      |       |       |       |       |       |       |       |       |      |      |      |       |      |      |      |      |      |      |                 |
| El Salvador              |                                                                                                                                                                    |      |      |       |       | 3     |       |       |       |       |       |      |      |      |       |      |      |      |      |      |      | 3               |
| Equatorial Guinea        | 8                                                                                                                                                                  |      |      |       |       |       |       |       |       |       |       |      |      |      |       |      |      |      |      |      |      | 8               |
| Eritrea                  |                                                                                                                                                                    |      |      |       |       |       |       |       |       |       |       |      |      |      |       |      |      |      |      |      |      |                 |
| Ethiopia                 | 103                                                                                                                                                                | 118  | 109  | 112   | 62    | 61    | 62    | 62    | 77    | 72    | 77    | 102  | 30   | 26   |       |      |      |      |      |      |      | 77              |
| Fiji                     |                                                                                                                                                                    |      |      |       | -8    |       |       |       |       |       |       |      |      |      |       |      |      |      |      |      |      | -8              |
| Gabon                    | -64                                                                                                                                                                |      |      |       |       |       |       |       |       |       |       |      |      |      |       |      |      |      |      |      |      | -64             |
| Gambia                   | 0                                                                                                                                                                  |      |      |       |       |       |       |       |       |       |       |      |      |      |       |      |      |      |      |      |      | 0               |
| Georgia                  | -6                                                                                                                                                                 |      |      |       |       |       | -5    | -4    | -4    | -4    | -4    | -4   | -4   | -4   |       |      |      | -5   |      |      |      | -5              |
| Ghana                    | -4                                                                                                                                                                 | -1   | 3    | 4     | 7     | 4     | 3     |       |       |       |       |      |      |      |       |      |      |      |      |      |      | 2               |
| Grenada                  |                                                                                                                                                                    |      |      |       |       |       |       |       |       |       |       |      |      |      |       |      |      |      |      |      |      |                 |
| Guatemala                | -25                                                                                                                                                                |      |      |       |       | -16   |       |       |       |       |       |      |      |      |       |      |      |      |      |      |      | -21             |
| Guinea                   | -444                                                                                                                                                               |      |      |       |       |       |       |       |       |       |       |      |      |      |       |      |      |      |      |      |      | -444            |
| Guinea Bissau            |                                                                                                                                                                    |      |      |       |       |       | 4     |       |       |       | -13   |      |      |      |       |      |      |      |      |      |      | -5              |
| Guyana                   | -57                                                                                                                                                                | -56  | -56  | -55   | -55   |       |       |       |       |       |       |      |      |      |       |      |      |      |      |      |      | -56             |
| Haiti                    | 1                                                                                                                                                                  |      |      |       |       |       |       |       |       |       |       |      |      |      |       |      |      |      |      |      |      | 1               |
| Honduras                 | 3                                                                                                                                                                  |      |      |       |       | -10   |       |       |       |       |       |      |      |      |       | -7   |      |      |      |      |      | -5              |
| India                    | -236                                                                                                                                                               |      |      |       |       |       |       |       |       |       | -256  |      |      |      |       |      | -309 |      |      |      |      | -267            |
| Indonesia                | 821                                                                                                                                                                |      |      |       |       |       |       |       |       |       |       |      |      |      |       |      |      |      |      |      |      | 821             |
| Iran                     | 9                                                                                                                                                                  |      |      |       |       |       |       |       |       |       |       |      |      |      |       |      |      |      |      |      |      | 9               |
| Iraq                     |                                                                                                                                                                    |      |      |       |       |       |       |       |       |       |       |      |      |      |       |      |      |      |      |      |      |                 |
| Israel                   | 0                                                                                                                                                                  |      |      | 0     | 0     | 0     | 0     | 0     | 0     | 0     | 0     | 0    | 0    | 0    | 0     | 0    | 0    | 0    | 0    | 0    | 0    | 0               |
| Jamaica                  |                                                                                                                                                                    |      |      |       |       | -2    | -2    | -2    | -2    | -2    | -2    | -2   | -2   | -2   | -2    | -2   | -2   | -2   | -2   | -2   | -2   | -2              |
| Jordan                   | 1                                                                                                                                                                  |      |      |       |       |       | 1     |       |       |       |       |      |      |      |       |      |      | -1   |      |      |      | 0               |
| Kenya                    | 21                                                                                                                                                                 |      |      |       |       | 18    |       |       |       |       | 21    |      |      |      |       |      |      |      |      |      |      | 20              |
| Kiribati                 |                                                                                                                                                                    |      |      |       |       |       |       |       |       |       |       |      |      |      |       |      |      |      |      |      |      |                 |
| Kuwait                   |                                                                                                                                                                    |      |      |       |       |       |       |       |       |       |       |      |      |      |       |      |      | 0    |      |      |      | 0               |
| Kyrgyzstan               | 0                                                                                                                                                                  | 0    | 0    | 0     | 0     | 0     | 0     | 0     | 0     | 0     | 0     |      |      |      |       |      |      |      |      |      |      | 0               |
| Lao People's Dem. Rep.   | 41                                                                                                                                                                 |      |      |       |       |       |       |       |       |       |       |      |      |      |       |      |      |      |      |      |      | 41              |
| Lebanon                  | 0                                                                                                                                                                  |      |      |       |       |       |       |       |       |       |       |      |      |      |       |      |      |      |      |      |      | -2              |
| Lesotho                  | -1                                                                                                                                                                 |      |      |       |       |       |       |       |       |       |       |      | -3   | -3   | -3    |      |      |      |      |      |      | -1              |
| Liberia                  | -97                                                                                                                                                                |      |      |       |       |       |       |       |       |       |       |      |      |      |       | -20  |      |      |      |      |      | -59             |
| Libya                    |                                                                                                                                                                    |      |      |       |       |       |       |       |       |       |       |      |      |      |       |      |      |      |      |      |      |                 |
| Madagascar               | -234                                                                                                                                                               |      |      |       |       | -158  | -169  | -175  | -171  | -168  | -97   |      |      |      |       |      |      |      |      |      |      | -167            |

Supplementary table 8 (continues)

|                           | Non-Annex I countries: LULUCF in National Comm. and Biennial Update Reports, original not gap-filled data in the UNFCCC GHG Data Interface, Mt CO2/yr |      |      |      |      |      |      |      |      |      |      |      |      |      |      |      |      |      |      |      |       | Aver. 2000-2020 |
|---------------------------|-------------------------------------------------------------------------------------------------------------------------------------------------------|------|------|------|------|------|------|------|------|------|------|------|------|------|------|------|------|------|------|------|-------|-----------------|
|                           | 2000                                                                                                                                                  | 2001 | 2002 | 2003 | 2004 | 2005 | 2006 | 2007 | 2008 | 2009 | 2010 | 2011 | 2012 | 2013 | 2014 | 2015 | 2016 | 2017 | 2018 | 2019 | 2020  |                 |
| Malawi                    |                                                                                                                                                       |      |      |      |      |      |      |      |      |      |      |      |      |      |      |      |      |      |      |      |       |                 |
| Malaysia                  | -229                                                                                                                                                  | -235 | -256 | -261 | -246 | -232 | -257 | -231 | -256 | -251 | -263 | -260 |      |      |      |      |      |      |      |      |       |                 |
| Maldives                  |                                                                                                                                                       |      |      |      |      |      |      |      |      |      |      |      |      |      |      |      |      |      |      |      |       |                 |
| Mali                      | -66                                                                                                                                                   |      |      |      |      |      |      |      |      |      | -245 |      |      |      |      |      |      |      |      |      |       |                 |
| Marshall Islands          |                                                                                                                                                       |      |      |      |      |      |      |      |      |      |      |      |      |      |      |      |      |      |      |      |       |                 |
| Mauritania                | -1                                                                                                                                                    |      |      |      |      |      |      |      |      |      |      |      |      |      |      |      |      |      |      |      |       |                 |
| Mauritius                 | 0                                                                                                                                                     | 0    | 0    | 0    | 0    | 0    | -1   |      |      |      |      |      |      |      | 0    |      |      |      |      |      |       |                 |
| Mexico                    | 49                                                                                                                                                    | 46   | 46   | 48   | 42   | 47   | 46   | 27   | 29   | 31   | 26   | 51   | 31   | 31   |      |      |      |      |      |      |       |                 |
| Micronesia                | -1                                                                                                                                                    |      |      |      |      |      |      |      |      |      |      |      |      |      |      |      |      |      |      |      |       |                 |
| Mongolia                  |                                                                                                                                                       |      |      |      |      |      | -2   |      |      |      |      |      |      |      |      |      |      |      |      |      |       |                 |
| Montenegro                | -2                                                                                                                                                    | -2   | -2   | -2   | -2   | -2   | -2   | -2   | -2   | -2   | -2   | -2   |      |      |      |      |      |      |      |      |       |                 |
| Morocco                   | 4                                                                                                                                                     |      |      |      |      |      |      |      |      |      | 5    |      |      | 4    |      |      |      |      |      |      |       |                 |
| Mozambique                |                                                                                                                                                       |      |      |      |      |      |      |      |      |      |      |      |      |      |      |      |      |      |      |      |       |                 |
| Myanmar                   | -109                                                                                                                                                  | -101 | -99  | -98  | -97  | -96  |      |      |      |      |      |      |      |      |      |      |      |      |      |      |       |                 |
| Namibia                   | 11                                                                                                                                                    |      |      |      |      |      |      |      |      |      |      |      |      |      |      |      |      |      |      |      |       |                 |
| Nauru                     |                                                                                                                                                       |      |      |      |      |      |      |      |      |      |      |      |      |      |      |      |      |      |      |      |       |                 |
| Nepal                     | -13                                                                                                                                                   |      |      |      |      |      |      |      |      |      |      |      |      |      |      |      |      |      |      |      |       |                 |
| Nicaragua                 | 45                                                                                                                                                    |      |      |      |      |      |      |      |      |      |      |      |      |      |      |      |      |      |      |      |       |                 |
| Niger                     | -17                                                                                                                                                   |      |      |      |      |      |      |      | -35  |      |      |      |      |      |      |      |      |      |      |      |       |                 |
| Nigeria                   | 98                                                                                                                                                    |      |      |      |      |      |      |      |      |      |      |      |      |      |      |      |      |      |      |      |       |                 |
| Niue                      |                                                                                                                                                       |      |      |      |      |      |      |      |      | 0    |      |      |      |      |      |      |      |      |      |      |       |                 |
| Oman                      | -1                                                                                                                                                    | -2   | -3   | -1   | -1   | -1   | -1   | 0    | -1   | -1   |      |      |      |      |      |      |      |      |      |      |       |                 |
| Pakistan                  |                                                                                                                                                       |      |      |      |      |      |      |      |      |      |      |      |      |      |      |      |      |      |      |      |       |                 |
| Palau                     | 0                                                                                                                                                     |      |      |      |      | 0    |      |      |      |      |      |      |      |      |      |      |      |      |      |      |       |                 |
| Panama                    | -7                                                                                                                                                    |      |      |      |      |      |      |      |      |      |      |      |      |      |      |      |      |      |      |      |       |                 |
| Papua New Guinea          | -181                                                                                                                                                  |      |      |      |      |      |      |      |      |      |      |      |      |      |      |      |      |      |      |      |       |                 |
| Paraguay                  | 66                                                                                                                                                    |      |      |      |      | 73   |      |      |      |      |      | 87   | 120  |      |      | 16   |      | 15   |      |      |       |                 |
| Peru                      | 57                                                                                                                                                    |      |      |      |      |      |      |      |      |      |      | 41   |      | 83   |      |      |      |      |      |      |       |                 |
| Philippines               | -105                                                                                                                                                  |      |      |      |      |      |      |      |      |      |      |      |      |      |      |      |      |      |      |      |       |                 |
| Qatar                     |                                                                                                                                                       |      |      |      |      |      |      |      |      |      |      |      |      |      |      |      |      |      |      |      |       |                 |
| Republic of Korea         | -60                                                                                                                                                   | -59  | -57  | -56  | -57  | -55  | -56  | -57  | -58  | -57  | -55  | -55  | -49  | -45  | -43  | -43  | -45  |      |      |      |       |                 |
| Republic of Moldova       | -1                                                                                                                                                    | -1   | -1   | -2   | 0    | 0    | -1   | -3   | 0    | -1   | -1   | 0    | -2   | 0    |      |      |      |      |      |      |       |                 |
| Rwanda                    |                                                                                                                                                       |      | -7   |      |      | -9   |      |      |      |      |      |      |      |      |      |      |      |      |      |      |       |                 |
| Saint Kitts and Nevis     |                                                                                                                                                       |      |      |      |      |      |      |      |      |      |      |      |      |      |      |      |      |      |      |      |       |                 |
| Saint Lucia               | 0                                                                                                                                                     |      |      |      |      | 0    |      |      |      |      | 0    |      |      |      |      |      |      |      |      |      |       |                 |
| Saint Vincent and Grenad. | 0                                                                                                                                                     |      |      |      | 0    |      |      |      |      |      |      |      |      |      |      |      |      |      |      |      |       |                 |
| Samoa                     |                                                                                                                                                       |      |      |      |      |      |      |      |      |      |      |      |      |      |      |      |      |      |      |      |       |                 |
| San Marino                |                                                                                                                                                       |      |      |      |      |      |      | 0    |      |      | 0    |      |      |      |      |      |      |      |      |      |       |                 |
| Sao Tome and Principe     |                                                                                                                                                       |      |      |      |      |      |      |      |      |      |      |      | 0    |      |      |      |      |      |      |      |       |                 |
| Saudi Arabia              | -14                                                                                                                                                   |      |      |      |      |      |      |      |      |      | -9   |      | -9   |      |      |      |      |      |      |      |       |                 |
| Senegal                   | -11                                                                                                                                                   |      |      |      |      | -11  |      |      |      |      |      |      |      |      |      |      |      |      |      |      |       |                 |
| Serbia                    |                                                                                                                                                       |      |      |      |      |      |      |      |      |      |      |      |      |      |      |      |      |      |      |      |       |                 |
| Seychelles                | -1                                                                                                                                                    |      |      |      |      |      |      |      |      |      |      |      |      |      |      |      |      |      |      |      |       |                 |
| Sierra Leone              |                                                                                                                                                       |      |      |      |      |      |      |      |      |      |      |      |      |      |      |      |      |      |      |      |       |                 |
| Singapore                 |                                                                                                                                                       |      |      |      |      |      |      |      |      |      |      |      | 0    |      |      |      |      |      |      |      |       |                 |
| Solomon Islands           |                                                                                                                                                       |      |      |      |      |      |      |      |      |      |      |      |      |      |      |      |      |      |      |      |       |                 |
| Somalia                   |                                                                                                                                                       |      |      |      |      |      |      |      |      |      |      |      |      |      |      |      |      |      |      |      |       |                 |
| South Africa              |                                                                                                                                                       |      |      |      |      |      |      |      |      |      |      |      |      | 3    | 3    | 3    | 3    |      |      |      |       |                 |
| Sri Lanka                 | -6                                                                                                                                                    |      |      |      |      |      |      |      |      |      |      |      |      |      |      |      |      |      |      |      |       |                 |
| South Sudan               |                                                                                                                                                       |      |      |      |      |      |      |      |      |      |      |      | 0    |      |      |      |      |      |      |      |       |                 |
| Sudan                     | 8                                                                                                                                                     |      |      |      |      |      |      |      |      |      |      |      |      |      |      |      |      |      |      |      |       |                 |
| Suriname                  |                                                                                                                                                       |      |      | 1    |      |      |      |      |      |      |      |      |      |      |      |      |      |      |      |      |       |                 |
| Swaziland                 |                                                                                                                                                       |      |      |      |      |      |      |      |      |      |      |      |      |      |      |      |      |      |      |      |       |                 |
| Syrian Arab Republic      | -2                                                                                                                                                    | -2   | -2   | -2   | -2   | -2   | -2   | -2   | -2   | -2   | -2   |      |      |      |      |      |      |      |      |      |       |                 |
| Tajikistan                |                                                                                                                                                       |      |      |      |      |      |      |      |      |      |      |      |      |      |      |      |      |      |      |      |       |                 |
| Thailand                  |                                                                                                                                                       |      |      |      |      |      |      |      |      |      |      |      |      | -87  |      |      |      |      |      |      |       |                 |
| Macedonia                 |                                                                                                                                                       |      |      |      |      |      |      |      |      |      |      |      |      |      |      |      |      |      |      |      |       |                 |
| Timor-Leste               |                                                                                                                                                       |      |      |      |      |      |      |      |      |      | 0    |      |      |      |      |      |      |      |      |      |       |                 |
| Togo                      |                                                                                                                                                       |      |      |      |      |      |      |      |      |      |      |      |      |      |      |      |      |      |      |      |       |                 |
| Tonga                     | -2                                                                                                                                                    |      |      |      |      |      | -2   |      |      |      |      |      |      |      |      |      |      |      |      |      |       |                 |
| Trinidad and Tobago       |                                                                                                                                                       |      |      |      |      |      |      |      |      |      |      |      |      |      |      |      |      |      |      |      |       |                 |
| Tunisia                   | -2                                                                                                                                                    |      |      |      |      |      |      |      |      |      |      |      |      |      |      |      |      |      |      |      |       |                 |
| Turkmenistan              |                                                                                                                                                       |      |      |      | -1   |      |      |      |      |      |      |      |      |      |      |      |      |      |      |      |       |                 |
| Tuvalu                    |                                                                                                                                                       |      |      |      |      |      |      |      |      |      |      |      |      |      |      |      |      |      |      |      |       |                 |
| Uganda                    | 9                                                                                                                                                     |      |      |      |      |      |      |      |      |      |      |      |      |      |      | 0    |      |      |      |      |       |                 |
| United Arab Emirates      | -10                                                                                                                                                   |      |      |      |      | -13  |      |      |      |      |      |      |      |      |      | -8   |      |      |      |      |       |                 |
| United Rep. of Tanzania   |                                                                                                                                                       |      |      |      |      |      |      |      |      |      |      |      |      |      |      |      |      |      |      |      |       |                 |
| Uruguay                   | -12                                                                                                                                                   |      | -11  |      | -11  |      | -9   |      | -5   |      | -7   |      | -9   |      | -4   |      | -8   | 1    |      |      |       |                 |
| Uzbekistan                | -1                                                                                                                                                    | 0    | 0    | -1   | -1   | 0    | 0    | 1    | -2   | -3   | -3   | -3   | -3   |      |      |      |      |      |      |      |       |                 |
| Vanuatu                   | -8                                                                                                                                                    |      |      |      |      |      |      |      |      |      |      |      |      |      |      |      |      |      |      |      |       |                 |
| Venezuela                 |                                                                                                                                                       |      |      |      |      |      |      |      |      |      |      |      |      |      |      |      |      |      |      |      |       |                 |
| Viet Nam                  | 12                                                                                                                                                    |      |      |      |      |      |      |      |      |      | -20  |      | -34  |      |      |      |      |      |      |      |       |                 |
| Yemen                     | -2                                                                                                                                                    |      |      |      |      |      |      |      |      |      | -2   |      | -2   |      |      |      |      |      |      |      |       |                 |
| Zambia                    | 34                                                                                                                                                    |      |      |      |      |      |      |      |      |      |      |      |      |      |      |      |      |      |      |      |       |                 |
| Zimbabwe                  | -88                                                                                                                                                   |      |      |      |      |      | -83  |      |      |      |      |      |      |      |      |      |      |      |      |      |       |                 |
| TOTAL                     |                                                                                                                                                       |      |      |      |      |      |      |      |      |      |      |      |      |      |      |      |      |      |      |      | -3284 |                 |

**Supplementary table 9.** Non-Annex I countries: net CO<sub>2</sub> flux from all elected activities under REDD+ ( original data not gap-filled). Data refer to the latest submissions available in February 2022.

|                          | Non-Annex I countries: CO <sub>2</sub> flux from all elected activities under REDD+, original not gap-filled data in our NGHGI DB, Mt CO <sub>2</sub> /yr |      |      |      |      |      |      |      |      |      |      |      |      |      |      |      |      |      |      |      | year of subm. | Activities                   |
|--------------------------|-----------------------------------------------------------------------------------------------------------------------------------------------------------|------|------|------|------|------|------|------|------|------|------|------|------|------|------|------|------|------|------|------|---------------|------------------------------|
|                          | 2000                                                                                                                                                      | 2001 | 2002 | 2003 | 2004 | 2005 | 2006 | 2007 | 2008 | 2009 | 2010 | 2011 | 2012 | 2013 | 2014 | 2015 | 2016 | 2017 | 2018 | 2019 | 2020          |                              |
| Afghanistan              |                                                                                                                                                           |      |      |      |      |      |      |      |      |      |      |      |      |      |      |      |      |      |      |      |               |                              |
| Albania                  |                                                                                                                                                           |      |      |      |      |      |      |      |      |      |      |      |      |      |      |      |      |      |      |      |               |                              |
| Algeria                  |                                                                                                                                                           |      |      |      |      |      |      |      |      |      |      |      |      |      |      |      |      |      |      |      |               |                              |
| Andorra                  |                                                                                                                                                           |      |      |      |      |      |      |      |      |      |      |      |      |      |      |      |      |      |      |      |               |                              |
| Angola                   |                                                                                                                                                           |      |      |      |      |      |      |      |      |      |      |      |      |      |      |      |      |      |      |      |               |                              |
| Antigua and Barbuda      |                                                                                                                                                           |      |      |      |      |      |      |      |      |      |      |      |      |      |      |      |      |      |      |      |               |                              |
| Argentina                |                                                                                                                                                           |      | 109  | 109  | 109  | 109  | 122  | 134  | 111  | 76   | 74   | 66   | 99   | 97   | 57   | 42   | 39   |      |      |      | 2019          | DEF                          |
| Armenia                  |                                                                                                                                                           |      |      |      |      |      |      |      |      |      |      |      |      |      |      |      |      |      |      |      |               |                              |
| Azerbaijan               |                                                                                                                                                           |      |      |      |      |      |      |      |      |      |      |      |      |      |      |      |      |      |      |      |               |                              |
| Bahamas                  |                                                                                                                                                           |      |      |      |      |      |      |      |      |      |      |      |      |      |      |      |      |      |      |      |               |                              |
| Bahrain                  |                                                                                                                                                           |      |      |      |      |      |      |      |      |      |      |      |      |      |      |      |      |      |      |      |               |                              |
| Bangladesh               | 0                                                                                                                                                         | 0    | 0    | 0    | 0    | 0    | 0    | 0    | 0    | 0    | 0    | 0    | 0    | 0    | 0    | 0    |      |      |      |      | 2019          | DEF, DEG, ECS                |
| Barbados                 |                                                                                                                                                           |      |      |      |      |      |      |      |      |      |      |      |      |      |      |      |      |      |      |      |               |                              |
| Belize                   | 3                                                                                                                                                         | 4    | 1    | 0    | 0    | 1    | 1    | 1    | 1    | 2    | 0    | 8    | 4    | 7    | 2    | 5    |      |      |      |      | 2020          | DEF, DEG, CCS, ECS, SMF      |
| Benin                    |                                                                                                                                                           |      |      |      |      |      |      |      |      |      |      |      |      |      |      |      |      |      |      |      |               |                              |
| Bhutan                   |                                                                                                                                                           |      |      |      |      | -8   | -8   | -8   | -8   | -8   | -8   | -8   | -8   | -8   | -8   |      |      |      |      |      | 2020          | DEF, DEG, SMF, CCS, ECS      |
| Bolivia                  |                                                                                                                                                           |      |      |      |      |      |      |      |      |      |      |      |      |      |      |      |      |      |      |      |               |                              |
| Bosnia and Herzegovina   |                                                                                                                                                           |      |      |      |      |      |      |      |      |      |      |      |      |      |      |      |      |      |      |      |               |                              |
| Botswana                 |                                                                                                                                                           |      |      |      |      |      |      |      |      |      |      |      |      |      |      |      |      |      |      |      |               |                              |
| Brazil (Amazon)          | 980                                                                                                                                                       | 909  | 1334 | 1375 | 1380 | 1164 | 576  | 609  | 669  | 373  | 363  | 286  | 237  | 302  | 274  | 288  |      |      |      |      | 2018          | DEF                          |
| Brazil (Cerrado)         | 468                                                                                                                                                       | 468  | 478  | 478  | 306  | 306  | 223  | 223  | 158  | 158  |      |      |      |      |      |      |      |      |      |      | 2017          | DEF                          |
| Brunei Darussalam        |                                                                                                                                                           |      |      |      |      |      |      |      |      |      |      |      |      |      |      |      |      |      |      |      |               |                              |
| Burkina Faso             | 13                                                                                                                                                        | 12   | 13   | 12   | 11   | 12   | 10   | 10   | 9    | 9    | 9    | 9    | 8    | 8    | 8    | 8    | 7    | 7    |      |      | 2020          | DEF, DEG, ECS (NF-F and F-F) |
| Burundi                  |                                                                                                                                                           |      |      |      |      |      |      |      |      |      |      |      |      |      |      |      |      |      |      |      |               |                              |
| Cambodia                 |                                                                                                                                                           |      |      |      |      |      |      |      |      |      | 71   | 71   | 71   | 71   | 56   | 56   | 40   | 40   |      |      | 2021          | DEF, ECS                     |
| Cameroon                 |                                                                                                                                                           |      |      |      |      |      |      |      |      |      |      |      |      |      |      |      |      |      |      |      |               |                              |
| Cape Verde               |                                                                                                                                                           |      |      |      |      |      |      |      |      |      |      |      |      |      |      |      |      |      |      |      |               |                              |
| Central African Republic |                                                                                                                                                           |      |      |      |      |      |      |      |      |      |      |      |      |      |      |      |      |      |      |      |               |                              |
| Chad                     |                                                                                                                                                           |      |      |      |      |      |      |      |      |      |      |      |      |      |      |      |      |      |      |      |               |                              |
| Chile                    | 0                                                                                                                                                         | 0    | 0    | 0    | 0    | 0    | 0    | 0    | 0    | 0    | 0    | 0    | 0    | 0    |      |      |      |      |      |      | 2016          | DEF, DEG, ECS                |
| China                    |                                                                                                                                                           |      |      |      |      |      |      |      |      |      |      |      |      |      |      |      |      |      |      |      |               |                              |
| Colombia                 |                                                                                                                                                           |      |      |      |      |      |      |      | 94   | 94   | 94   | 94   | 94   | 94   | 94   | 94   | 94   | 94   |      |      | 2020          | DEF                          |
| Comoros                  |                                                                                                                                                           |      |      |      |      |      |      |      |      |      |      |      |      |      |      |      |      |      |      |      |               |                              |
| Congo                    | 35                                                                                                                                                        | 35   | 35   | 35   | 35   | 35   | 35   | 35   | 35   | 35   | 35   | 35   | 35   |      |      |      |      |      |      |      | 2016          | DEF, DEG                     |
| Cook Islands             |                                                                                                                                                           |      |      |      |      |      |      |      |      |      |      |      |      |      |      |      |      |      |      |      |               |                              |
| Costa Rica               | 17                                                                                                                                                        | 17   | 17   | 17   | 17   | 17   | 17   | 17   | 17   | 17   | 9    | 9    | 9    | 9    | 9    | 9    |      |      |      |      | 2016          | DEF, ECS                     |
| Cote d'Ivoire            | 41                                                                                                                                                        | 40   | 38   | 37   | 35   | 34   | 32   | 31   | 29   | 28   | 26   | 25   | 24   | 22   | 21   | 21   |      |      |      |      | 2017          | DEF, ECS                     |
| Cuba                     |                                                                                                                                                           |      |      |      |      |      |      |      |      |      |      |      |      |      |      |      |      |      |      |      |               |                              |
| Dem. Rep. Korea          |                                                                                                                                                           |      |      |      |      |      |      |      |      |      |      |      |      |      |      |      |      |      |      |      |               |                              |
| Dem. Rep. Congo (DRC)    | 484                                                                                                                                                       | 484  | 484  | 484  | 484  | 484  | 484  | 484  | 484  | 484  | 831  | 831  | 831  | 831  | 831  |      |      |      |      |      | 2018          | DEF                          |
| Djibouti                 |                                                                                                                                                           |      |      |      |      |      |      |      |      |      |      |      |      |      |      |      |      |      |      |      |               |                              |
| Dominica                 | 0                                                                                                                                                         | 0    | 0    | 0    | 0    | 0    | 0    | 0    | 0    | 0    | 0    | 0    | 0    | 0    | 0    | 0    | 0    | 20   | 0    | 0    | 2022          |                              |
| Dominican Republic       |                                                                                                                                                           |      |      |      |      |      |      |      |      |      |      |      |      |      |      |      |      |      |      |      | 2020          | DEF, DEG, ECS (NF-F and F-F) |
| Ecuador                  | 26                                                                                                                                                        | 26   | 26   | 26   | 26   | 26   | 26   | 26   | 26   | 22   | 22   | 22   | 22   | 22   | 22   | 22   |      |      |      |      | 2020          | DEF                          |
| Egypt                    |                                                                                                                                                           |      |      |      |      |      |      |      |      |      |      |      |      |      |      |      |      |      |      |      |               |                              |
| El Salvador              |                                                                                                                                                           | 2    | 2    | 2    | 2    | 2    | 2    | 2    | 2    | 2    | 2    | 0    | 0    | 0    | 0    | 0    | 0    | 0    | 0    |      | 2021          | DEF, DEG, ECS (NF-F and F-F) |
| Equatorial Guinea        |                                                                                                                                                           |      |      |      |      | 9    | 9    | 9    | 9    | 9    | 9    | 9    | 9    | 9    | 9    |      |      |      |      |      | 2020          | DEF, DEG                     |
| Eritrea                  |                                                                                                                                                           |      |      |      |      |      |      |      |      |      |      |      |      |      |      |      |      |      |      |      |               |                              |
| Ethiopia                 | 18                                                                                                                                                        | 18   | 18   | 18   | 18   | 18   | 18   | 18   | 18   | 18   | 18   | 18   | 18   | 18   |      |      |      |      |      |      | 2017          | DEF, ECS                     |
| Fiji                     |                                                                                                                                                           |      |      |      |      |      |      |      |      |      |      |      |      |      |      |      |      |      |      |      |               |                              |
| Gabon                    | -107                                                                                                                                                      | -107 | -107 | -107 | -107 | -107 | -107 | -107 | -107 |      |      |      |      |      |      |      |      |      |      |      | 2021          | DEF, DEG, SMF, CCS, ECS      |
| Gambia                   |                                                                                                                                                           |      |      |      |      |      |      |      |      |      |      |      |      |      |      |      |      |      |      |      |               |                              |
| Georgia                  |                                                                                                                                                           |      |      |      |      |      |      |      |      |      |      |      |      |      |      |      |      |      |      |      |               |                              |
| Ghana                    | 0                                                                                                                                                         | 1    | 0    | 0    | 1    | 1    | 1    | 1    | 1    | 1    | 1    | 4    | 2    | 4    | 4    | 0    |      |      |      |      | 2021          | DEF, DEG, ECS (NF-F)         |
| Grenada                  |                                                                                                                                                           |      |      |      |      |      |      |      |      |      |      |      |      |      |      |      |      |      |      |      |               |                              |
| Guatemala                | 17                                                                                                                                                        | 17   | 17   | 17   | 17   | 17   | 17   | 17   | 17   | 17   | 17   | 17   | 17   | 17   | 17   | 17   | 17   | 17   | 17   | 17   | 2022          |                              |
| Guinea                   |                                                                                                                                                           |      |      |      |      |      |      |      |      |      |      |      |      |      |      |      |      |      |      |      |               |                              |
| Guinea Bissau            |                                                                                                                                                           |      |      |      |      |      |      |      |      |      |      |      |      |      |      |      |      |      |      |      | 2019          | DEF                          |
| Guyana                   |                                                                                                                                                           | 46   | 46   | 46   | 46   | 46   | 46   | 46   | 46   | 46   | 46   | 46   | 46   |      |      |      |      |      |      |      | 2015          | DEF, DEG                     |
| Haiti                    |                                                                                                                                                           |      |      |      |      |      |      |      |      |      |      |      |      |      |      |      |      |      |      |      |               |                              |
| Honduras                 | 8                                                                                                                                                         | 8    | 8    | 8    | 8    | 8    | 8    | 8    | 8    | 8    | 8    | 8    | 8    | 8    | 8    | 8    | 8    | 8    |      |      | 2020          | DEF, DEG, ECS                |
| India                    | -50                                                                                                                                                       | -50  | -50  | -50  | -50  | -50  | -50  | -50  | -50  | -50  | -50  | -50  | -50  | -50  | -50  | -50  | -50  | -50  | -50  | -50  | 2018          | SMF                          |
| Indonesia                | 268                                                                                                                                                       | 268  | 268  | 268  | 268  | 268  | 268  | 268  | 268  | 268  | 268  | 268  | 268  |      |      |      |      |      |      |      | 2022          | DEF, DEG, ECS                |
| Iran                     |                                                                                                                                                           |      |      |      |      |      |      |      |      |      |      |      |      |      |      |      |      |      |      |      |               |                              |
| Iraq                     |                                                                                                                                                           |      |      |      |      |      |      |      |      |      |      |      |      |      |      |      |      |      |      |      |               |                              |
| Israel                   |                                                                                                                                                           |      |      |      |      |      |      |      |      |      |      |      |      |      |      |      |      |      |      |      |               |                              |
| Jamaica                  |                                                                                                                                                           |      |      |      |      |      |      |      |      |      |      |      |      |      |      |      |      |      |      |      |               |                              |
| Jordan                   |                                                                                                                                                           |      |      |      |      |      |      |      |      |      |      |      |      |      |      |      |      |      |      |      |               |                              |
| Kenya                    |                                                                                                                                                           |      | 63   | 63   | 63   | 63   | 38   | 38   | 38   | 38   | 50   | 50   | 50   | 50   | 57   | 57   | 57   | 57   |      |      | 2020          | DEF, DEG, SMF, ECS (NF-F)    |
| Kimberly                 |                                                                                                                                                           |      |      |      |      |      |      |      |      |      |      |      |      |      |      |      |      |      |      |      |               |                              |
| Kuwait                   |                                                                                                                                                           |      |      |      |      |      |      |      |      |      |      |      |      |      |      |      |      |      |      |      |               |                              |
| Kyrgyzstan               |                                                                                                                                                           |      |      |      |      |      |      |      |      |      |      |      |      |      |      |      |      |      |      |      |               |                              |
| Lao People's Dem. Rep.   |                                                                                                                                                           |      |      |      |      | 29   | 29   | 29   | 29   | 29   | 29   | 40   | 40   | 40   | 40   |      |      |      |      |      | 2018          | DEF, DEG, ECS                |
| Lebanon                  |                                                                                                                                                           |      |      |      |      |      |      |      |      |      |      |      |      |      |      |      |      |      |      |      |               |                              |
| Lesotho                  |                                                                                                                                                           |      |      |      |      |      |      |      |      |      |      |      |      |      |      |      |      |      |      |      |               |                              |
| Liberia                  |                                                                                                                                                           |      |      |      |      |      |      |      |      | 42   | 42   | 42   | 42   | 42   | 42   | 42   | 42   | 42   | 42   |      | 2020          | DEF, DEG                     |
| Libya                    |                                                                                                                                                           |      |      |      |      |      |      |      |      |      |      |      |      |      |      |      |      |      |      |      |               |                              |
| Madagascar               |                                                                                                                                                           |      |      |      |      |      | 34   | 34   | 34   | 34   | 34   | 34   | 34   | 34   | 34   | 34   |      |      |      |      | 2018          | DEF                          |

Supplementary table 9 (continues)

|                           | Non-Annex I countries: CO2 flux from all elected activities under REDD+, original not gap-filled data in our NGHGI DB, Mt CO2/yr |      |      |      |      |      |      |      |      |      |      |      |      |      |      |      |      |      |      |      | year of subm. | Activities |                              |
|---------------------------|----------------------------------------------------------------------------------------------------------------------------------|------|------|------|------|------|------|------|------|------|------|------|------|------|------|------|------|------|------|------|---------------|------------|------------------------------|
|                           | 2000                                                                                                                             | 2001 | 2002 | 2003 | 2004 | 2005 | 2006 | 2007 | 2008 | 2009 | 2010 | 2011 | 2012 | 2013 | 2014 | 2015 | 2016 | 2017 | 2018 | 2019 |               |            | 2020                         |
| Malawi                    |                                                                                                                                  |      |      |      |      |      | 4    | 4    | 4    | 4    | 4    | 4    | 4    | 4    | 4    | 4    | 4    |      |      |      |               | 2020       | DEF, DEG, ECS                |
| Malaysia                  |                                                                                                                                  |      |      |      |      | -206 | -206 | -206 | -206 | -206 | -206 | -206 | -206 | -206 | -206 | -206 | -206 |      |      |      |               | 2019       | DEF, SMF, ECS                |
| Maldives                  |                                                                                                                                  |      |      |      |      |      |      |      |      |      |      |      |      |      |      |      | 4    |      |      |      |               |            |                              |
| Mali                      |                                                                                                                                  |      |      |      |      |      |      |      |      |      |      |      |      |      |      |      |      |      |      |      |               |            |                              |
| Marshall Islands          |                                                                                                                                  |      |      |      |      |      |      |      |      |      |      |      |      |      |      |      |      |      |      |      |               |            |                              |
| Mauritania                |                                                                                                                                  |      |      |      |      |      |      |      |      |      |      |      |      |      |      |      |      |      |      |      |               |            |                              |
| Mauritius                 |                                                                                                                                  |      |      |      |      |      |      |      |      |      |      |      |      |      |      |      |      |      |      |      |               |            |                              |
| Mexico                    |                                                                                                                                  |      |      |      |      |      |      | 10   | 13   | 16   | 13   | 22   | 19   | 22   | 24   | 32   | 32   |      |      |      |               | 2020       | DEF, DEG                     |
| Micronesia                |                                                                                                                                  |      |      |      |      |      |      |      |      |      |      |      |      |      |      |      |      |      |      |      |               |            |                              |
| Mongolia                  |                                                                                                                                  |      |      |      |      | 3    | 3    | 3    | 3    | 3    | 3    | 3    | 3    | 3    | 3    | 3    | 3    |      |      |      |               | 2018       | DEF, DEG, ECS (NF-F)         |
| Montenegro                |                                                                                                                                  |      |      |      |      |      |      |      |      |      |      |      |      |      |      |      |      |      |      |      |               |            |                              |
| Morocco                   |                                                                                                                                  |      |      |      |      |      |      |      |      |      |      |      |      |      |      |      |      |      |      |      |               |            |                              |
| Mozambique                |                                                                                                                                  |      |      | 39   | 39   | 39   | 39   | 39   | 39   | 39   | 39   | 39   | 39   | 39   | 39   |      |      |      |      |      |               | 2018       | DEF                          |
| Myanmar                   |                                                                                                                                  |      |      |      |      | 52   | 52   | 51   | 51   | 51   | 50   | 50   | 50   | 50   | 49   | 49   |      |      |      |      |               | 2018       | DEF, ECS                     |
| Namibia                   |                                                                                                                                  |      |      |      |      |      |      |      |      |      |      |      |      |      |      |      |      |      |      |      |               |            |                              |
| Nauru                     |                                                                                                                                  |      |      |      |      |      |      |      |      |      |      |      |      |      |      |      |      |      |      |      |               |            |                              |
| Nepal                     |                                                                                                                                  | 1    | 1    | 1    | 1    | 1    | 1    | 1    | 1    | 1    | 1    | 1    | 1    |      |      |      |      |      |      |      |               | 2017       | DEF, DEG, ECS                |
| Nicaragua                 |                                                                                                                                  |      |      |      |      |      | 17   | 16   | 16   | 15   | 15   | 14   | 14   | 13   | 13   | 12   |      |      |      |      |               | 2019       | DEF, DEG, ECS (NF-F)         |
| Niger                     |                                                                                                                                  |      |      |      |      |      |      |      |      |      |      |      |      |      |      |      |      |      |      |      |               |            |                              |
| Nigeria                   |                                                                                                                                  |      |      |      |      | 32   | 32   | 32   | 32   | 32   | 32   | 32   | 32   | 32   | 32   | 32   | 32   |      |      |      |               | 2019       | DEF                          |
| Niue                      |                                                                                                                                  |      |      |      |      |      |      |      |      |      |      |      |      |      |      |      |      |      |      |      |               |            |                              |
| Oman                      |                                                                                                                                  |      |      |      |      |      |      |      |      |      |      |      |      |      |      |      |      |      |      |      |               |            |                              |
| Pakistan                  |                                                                                                                                  |      |      |      | 1    | 1    | 1    | 1    | 1    | 1    | 1    | 1    | 1    |      |      |      |      |      |      |      |               | 2020       | DEF                          |
| Palau                     |                                                                                                                                  |      |      |      |      |      |      |      |      |      |      |      |      |      |      |      |      |      |      |      |               |            |                              |
| Panama                    |                                                                                                                                  | -10  | -10  | -10  | -10  | -10  | -10  | -10  | -22  | -18  | -15  | -26  | -22  | -20  | -25  | -25  | -22  |      |      |      |               | 2022       | DEF, DEG, ECS (NF-F)         |
| Papua New Guinea          |                                                                                                                                  | 20   | 20   | 27   | 27   | 28   | 23   | 27   | 31   | 31   | 35   | 39   | 42   | 37   | 42   |      |      |      |      |      |               | 2017       | DEF, DEG, ECS                |
| Paraguay                  |                                                                                                                                  | 49   | 49   | 49   | 49   | 49   | 49   | 49   | 49   | 49   | 49   | 49   | 49   | 49   | 49   | 78   | 78   |      |      |      |               | 2022       | DEF                          |
| Peru                      |                                                                                                                                  | 70   |      |      |      |      |      |      |      |      | 70   | 74   | 77   | 95   | 73   | 66   | 88   | 63   | 63   | 89   |               | 2021       | DEF                          |
| Philippines               |                                                                                                                                  |      |      |      |      |      |      |      |      |      |      |      |      |      |      |      |      |      |      |      |               |            |                              |
| Qatar                     |                                                                                                                                  |      |      |      |      |      |      |      |      |      |      |      |      |      |      |      |      |      |      |      |               |            |                              |
| Republic of Korea         |                                                                                                                                  |      |      |      |      |      |      |      |      |      |      |      |      |      |      |      |      |      |      |      |               |            |                              |
| Republic of Moldova       |                                                                                                                                  |      |      |      |      |      |      |      |      |      |      |      |      |      |      |      |      |      |      |      |               |            |                              |
| Rwanda                    |                                                                                                                                  |      |      |      |      |      |      |      |      |      |      |      |      |      |      |      |      |      |      |      |               |            |                              |
| Saint Kitts and Nevis     |                                                                                                                                  |      |      |      |      |      |      |      |      |      |      |      |      |      |      |      |      |      |      |      |               |            |                              |
| Saint Lucia               |                                                                                                                                  |      | 0    | 0    | 0    | 0    | 0    | 0    | 0    | 0    | 0    | 0    | 0    | 0    | 0    | 0    | 0    | 0    | 0    | 0    |               | 2021       | DEF, DEG, ECS (NF-F and F-F) |
| Saint Vincent and Grenad. |                                                                                                                                  |      |      |      |      |      |      |      |      |      |      |      |      |      |      |      |      |      |      |      |               |            |                              |
| Samoa                     |                                                                                                                                  |      |      |      |      |      |      |      |      |      |      |      |      |      |      |      |      |      |      |      |               |            |                              |
| San Marino                |                                                                                                                                  |      |      |      |      |      |      |      |      |      |      |      |      |      |      |      |      |      |      |      |               |            |                              |
| Sao Tome and Principe     |                                                                                                                                  |      |      |      |      |      |      |      |      |      |      |      |      |      |      |      |      |      |      |      |               |            |                              |
| Saudi Arabia              |                                                                                                                                  |      |      |      |      |      |      |      |      |      |      |      |      |      |      |      |      |      |      |      |               |            |                              |
| Senegal                   |                                                                                                                                  |      |      |      |      |      |      |      |      |      |      |      |      |      |      |      |      |      |      |      |               |            |                              |
| Serbia                    |                                                                                                                                  |      |      |      |      |      |      |      |      |      |      |      |      |      |      |      |      |      |      |      |               |            |                              |
| Seychelles                |                                                                                                                                  |      |      |      |      |      |      |      |      |      |      |      |      |      |      |      |      |      |      |      |               |            |                              |
| Sierra Leone              |                                                                                                                                  |      |      |      |      |      |      |      |      |      |      |      |      |      |      |      |      |      |      |      |               |            |                              |
| Singapore                 |                                                                                                                                  |      |      |      |      |      |      |      |      |      |      |      |      |      |      |      |      |      |      |      |               |            |                              |
| Solomon Islands           |                                                                                                                                  |      | 2    | 3    | 2    | 3    | 6    | 5    | 6    | 7    | 6    | 7    | 7    | 9    | 9    | 13   | 14   | 15   | 16   |      |               | 2019       | DEF, DEG, ECS                |
| Somalia                   |                                                                                                                                  |      |      |      |      |      |      |      |      |      |      |      |      |      |      |      |      |      |      |      |               |            |                              |
| South Africa              |                                                                                                                                  |      |      |      |      |      |      |      |      |      |      |      |      |      |      |      |      |      |      |      |               |            |                              |
| Sri Lanka                 |                                                                                                                                  | 4    | 4    | 4    | 4    | 4    | 4    | 4    | 4    | 4    | 4    | 4    |      |      |      |      |      |      |      |      |               | 2017       | DEF, ECS                     |
| South Sudan               |                                                                                                                                  | 0    | 0    | 0    | 0    | 0    | 0    | 0    | 0    | 0    | 0    | 0    | 0    |      |      |      |      |      |      |      |               |            |                              |
| Sudan                     |                                                                                                                                  |      |      |      |      |      |      | 1    | 1    | 1    | 1    | 1    | 1    | 1    | 1    | 1    | 1    | 1    | 1    | 1    |               | 2020       | DEF, ECS                     |
| Suriname                  |                                                                                                                                  | 4    | 4    | 4    | 4    | 4    | 4    | 4    | 4    | 4    | 8    | 8    | 8    | 8    | 16   | 11   | 12   | 13   | 14   | 14   |               | 2021       | DEF, DEG                     |
| Eswatini                  |                                                                                                                                  |      |      |      |      |      |      |      |      |      |      |      |      |      |      |      |      |      |      |      |               |            |                              |
| Syrian Arab Republic      |                                                                                                                                  |      |      |      |      |      |      |      |      |      |      |      |      |      |      |      |      |      |      |      |               |            |                              |
| Tajikistan                |                                                                                                                                  |      |      |      |      |      |      |      |      |      |      |      |      |      |      |      |      |      |      |      |               |            |                              |
| Thailand                  |                                                                                                                                  |      |      |      |      | -16  | -16  | -16  | -16  | -16  | -16  | -16  | -16  | -16  | -16  | -16  | -16  |      |      |      |               | 2021       | DEF, DEG, ECS (NF-F and F-F) |
| Macedonia                 |                                                                                                                                  |      |      |      |      | 0    | 0    | 0    | 0    | 0    | 0    | 0    | 0    | 0    | 0    | 0    | 0    |      |      |      |               |            |                              |
| Timor-Leste               |                                                                                                                                  |      |      |      |      |      |      |      |      |      |      |      |      |      |      |      |      |      |      |      |               |            |                              |
| Togo                      |                                                                                                                                  |      |      | 1    | 1    | 1    | 1    | 1    | 1    | 1    | 1    | 1    | 1    | 1    | 1    | 1    | 1    | 1    | 1    | 1    |               | 2020       | DEF, ECS                     |
| Tonga                     |                                                                                                                                  |      |      |      |      |      |      |      |      |      |      |      |      |      |      |      |      |      |      |      |               |            |                              |
| Trinidad and Tobago       |                                                                                                                                  |      |      |      |      |      |      |      |      |      |      |      |      |      |      |      |      |      |      |      |               |            |                              |
| Tunisia                   |                                                                                                                                  |      |      |      |      |      |      |      |      |      |      |      |      |      |      |      |      |      |      |      |               |            |                              |
| Turkmenistan              |                                                                                                                                  |      |      |      |      |      |      |      |      |      |      |      |      |      |      |      |      |      |      |      |               |            |                              |
| Tuvalu                    |                                                                                                                                  |      |      |      |      |      |      |      |      |      |      |      |      |      |      |      |      |      |      |      |               |            |                              |
| Uganda                    |                                                                                                                                  | 8    | 8    | 8    | 8    | 8    | 8    | 8    | 8    | 8    | 8    | 8    | 8    | 8    | 8    | 8    | 8    |      |      |      |               | 2018       | DEF                          |
| United Arab Emirates      |                                                                                                                                  |      |      |      |      |      |      |      |      |      |      |      |      |      |      |      |      |      |      |      |               |            |                              |
| United Rep. of Tanzania   |                                                                                                                                  |      |      | 44   | 44   | 44   | 44   | 44   | 44   | 44   | 44   | 44   | 44   | 44   |      |      |      |      |      |      |               | 2017       | DEF                          |
| Uruguay                   |                                                                                                                                  |      |      |      |      |      |      |      |      |      |      |      |      |      |      |      |      |      |      |      |               |            |                              |
| Uzbekistan                |                                                                                                                                  |      |      |      |      |      |      |      |      |      |      |      |      |      |      |      |      |      |      |      |               |            |                              |
| Vanuatu                   |                                                                                                                                  |      |      |      |      |      |      |      |      |      |      |      |      |      |      |      |      |      |      |      |               |            |                              |
| Venezuela                 |                                                                                                                                  |      |      |      |      |      |      |      |      |      |      |      |      |      |      |      |      |      |      |      |               |            |                              |
| Viet Nam                  |                                                                                                                                  | 20   | 20   | 20   | 20   | 20   | 20   | 20   | 20   | 20   | 20   |      |      |      |      |      |      |      |      |      |               | 2016       | DEF, DEG, ECS                |
| Yemen                     |                                                                                                                                  |      |      |      |      |      |      |      |      |      |      |      |      |      |      |      |      |      |      |      |               |            |                              |
| Zambia                    |                                                                                                                                  |      |      |      |      |      |      |      |      |      | 24   | 24   | 24   | 24   | 24   | 24   | 24   | 24   | 24   | 24   |               | 2021       | DEF, DEG                     |
| Zimbabwe                  |                                                                                                                                  |      |      |      |      |      |      |      |      |      |      |      |      |      |      |      |      |      |      |      |               |            |                              |

**Supplementary table 10.** LULUCF in NDCs (original data not gap-filled). Only submissions in 2020 or 2021 are shown here. In some case, no LULUCF estimate was available in the NDCs.

|                          | Non-Annex I countries: LULUCF in Nationally Determined Contributions, original not gap-filled data in our NGHGI DB, Mt CO2/yr |      |      |      |      |      |      |      |      |      |      |      |      |      |      |      |      |      |      |      |      | year of subm. |
|--------------------------|-------------------------------------------------------------------------------------------------------------------------------|------|------|------|------|------|------|------|------|------|------|------|------|------|------|------|------|------|------|------|------|---------------|
|                          | 2000                                                                                                                          | 2001 | 2002 | 2003 | 2004 | 2005 | 2006 | 2007 | 2008 | 2009 | 2010 | 2011 | 2012 | 2013 | 2014 | 2015 | 2016 | 2017 | 2018 | 2019 | 2020 |               |
| Afghanistan              |                                                                                                                               |      |      |      |      |      |      |      |      |      |      |      |      |      |      |      |      |      |      |      |      |               |
| Albania                  |                                                                                                                               |      |      |      |      |      |      |      |      |      | 1    | 4    | 5    | 1    | 1    | 1    | 1    | 3    | 1    | 1    | 1    | 2021          |
| Algeria                  |                                                                                                                               |      |      |      |      |      |      |      |      |      |      |      |      |      |      |      |      |      |      |      |      |               |
| Andorra                  |                                                                                                                               |      |      |      |      |      |      |      |      |      |      |      |      |      |      |      |      |      |      |      |      |               |
| Angola                   |                                                                                                                               |      |      |      |      |      |      |      |      |      |      |      |      |      |      | 70   |      |      |      |      |      | 2021          |
| Antigua and Barbuda      |                                                                                                                               |      |      |      |      |      |      |      |      |      |      |      |      |      |      | 0    |      |      |      |      |      | 2021          |
| Argentina                |                                                                                                                               |      |      |      |      |      |      |      |      |      |      |      |      |      |      |      |      |      |      |      |      | 2021          |
| Armenia                  |                                                                                                                               |      |      |      |      |      |      |      |      |      |      |      |      |      |      |      |      |      |      |      |      | 2021          |
| Azerbaijan               |                                                                                                                               |      |      |      |      |      |      |      |      |      |      |      |      |      |      |      |      |      |      |      |      |               |
| Bahamas                  |                                                                                                                               |      |      |      |      |      |      |      |      |      |      |      |      |      |      |      |      |      |      |      |      |               |
| Bahrain                  |                                                                                                                               |      |      |      |      |      |      |      |      |      |      |      |      |      |      |      |      |      |      |      |      | 2021          |
| Bangladesh               |                                                                                                                               |      |      |      |      |      |      |      |      |      |      |      | 0    |      |      |      |      |      |      |      |      | 2021          |
| Barbados                 |                                                                                                                               |      |      |      |      |      |      |      |      |      |      |      |      |      |      |      |      |      |      |      |      | 2021          |
| Belize                   |                                                                                                                               |      |      |      |      |      |      |      |      |      |      |      | -8   |      |      | -6   |      | -7   |      | -7   |      | 2021          |
| Benin                    |                                                                                                                               |      |      |      |      |      |      |      |      |      |      |      |      |      |      |      |      |      |      |      |      | 2021          |
| Bhutan                   |                                                                                                                               |      |      |      |      |      |      |      |      |      |      |      |      |      |      |      |      |      |      |      |      | 2021          |
| Bolivia                  |                                                                                                                               |      |      |      |      |      |      |      |      |      |      |      |      |      |      |      |      |      |      |      |      |               |
| Bosnia and Herzegovina   |                                                                                                                               |      |      |      |      |      |      |      |      |      |      |      |      |      |      |      |      |      |      |      |      | 2021          |
| Botswana                 |                                                                                                                               |      |      |      |      |      |      |      |      |      |      |      |      |      |      |      |      |      |      |      |      |               |
| Brazil                   |                                                                                                                               |      |      |      |      |      |      |      |      |      |      |      |      |      |      |      |      |      |      |      |      | 2021          |
| Brunei Darussalam        |                                                                                                                               |      |      |      |      |      |      |      |      |      |      |      |      |      |      |      |      |      |      |      |      |               |
| Burkina Faso             |                                                                                                                               |      |      |      |      |      |      |      |      |      |      |      |      |      |      |      |      |      |      |      |      | 2021          |
| Burundi                  |                                                                                                                               |      |      |      |      | -4   |      |      |      |      | -2   |      |      |      |      | -1   |      |      |      |      | 0    | 2021          |
| Cambodia                 |                                                                                                                               |      |      |      |      |      |      |      |      |      |      |      |      |      |      |      |      |      |      |      |      |               |
| Cameroon                 |                                                                                                                               |      |      |      |      |      |      |      |      |      |      |      |      |      |      |      |      |      |      |      |      | 2021          |
| Cape Verde               | 0                                                                                                                             |      |      |      | 0    | 0    |      |      |      |      | 0    |      |      |      |      | 0    |      |      |      |      | 0    | 2021          |
| Central African Republic |                                                                                                                               |      |      |      |      |      |      |      |      |      | -229 |      |      |      |      |      |      |      |      |      |      | 2016          |
| Chad                     |                                                                                                                               |      |      |      |      |      |      |      |      |      | -5   |      |      |      |      |      |      |      | -1   |      | -1   | 2021          |
| Chile                    |                                                                                                                               |      |      |      |      |      |      |      |      |      |      |      |      |      |      |      |      |      |      |      |      |               |
| China                    |                                                                                                                               |      |      |      |      |      |      |      |      |      |      |      |      |      |      |      |      |      |      |      |      | 2021          |
| Colombia                 |                                                                                                                               |      |      |      |      |      |      |      |      |      |      |      |      |      |      |      |      |      |      |      |      |               |
| Comoros                  | -2                                                                                                                            |      |      |      |      | -2   |      |      |      |      |      |      |      |      |      | -2   |      |      |      |      | -2   | 2021          |
| Congo                    | -15                                                                                                                           |      |      |      |      |      |      |      |      |      |      |      |      |      |      | -19  |      | -22  |      |      | -21  | 2021          |
| Cook Islands             |                                                                                                                               |      |      |      |      |      |      |      |      |      |      |      |      |      |      |      |      |      |      |      |      |               |
| Costa Rica               |                                                                                                                               |      |      |      |      |      |      |      |      |      |      |      |      |      |      |      |      |      |      |      |      |               |
| Cote d'Ivoire            |                                                                                                                               |      |      |      |      |      |      |      |      |      |      |      |      |      |      |      |      |      |      |      |      |               |
| Cuba                     |                                                                                                                               |      |      |      |      |      |      |      |      |      |      |      |      |      |      |      |      |      |      |      |      |               |
| Dem. Rep. Korea          |                                                                                                                               |      |      |      |      |      |      |      |      |      |      |      |      |      |      |      |      |      |      |      |      |               |
| Dem. Rep. Congo (DRC)    | 484                                                                                                                           | 484  | 484  | 484  | 484  | 484  | 484  | 484  | 484  | 484  | 484  | 831  | 831  | 831  | 831  | 529  | 529  | 529  | 529  |      |      | 2021          |
| Djibouti                 |                                                                                                                               |      |      |      |      |      |      |      |      |      |      |      |      |      |      |      |      |      |      |      |      |               |
| Dominica                 |                                                                                                                               |      |      |      |      |      |      |      |      |      |      |      |      |      |      |      |      |      |      |      |      |               |
| Dominican Republic       |                                                                                                                               |      |      |      |      |      |      |      |      |      |      |      |      |      |      |      |      |      |      |      |      |               |
| Ecuador                  |                                                                                                                               |      |      |      |      |      |      |      |      |      |      |      |      |      |      |      |      |      |      |      |      |               |
| Egypt                    |                                                                                                                               |      |      |      |      |      |      |      |      |      |      |      |      |      |      |      |      |      |      |      |      |               |
| El Salvador              |                                                                                                                               |      |      |      |      |      |      |      |      |      |      |      |      |      | 12   |      |      |      |      |      |      | 2021          |
| Equatorial Guinea        |                                                                                                                               |      |      |      |      |      |      |      |      |      |      |      |      |      |      |      |      |      |      |      |      |               |
| Eritrea                  |                                                                                                                               |      |      |      |      |      |      |      |      |      |      |      |      |      |      |      |      |      |      |      |      |               |
| Ethiopia                 |                                                                                                                               |      |      |      |      |      |      |      |      |      | 120  |      |      |      |      |      |      |      |      | 125  | 125  | 2021          |
| Fiji                     |                                                                                                                               |      |      |      |      |      |      |      |      |      |      |      |      |      |      |      |      |      |      |      |      |               |
| Gabon                    |                                                                                                                               |      |      |      |      |      |      |      |      |      |      |      |      |      |      |      |      |      |      |      |      |               |
| Gambia                   |                                                                                                                               |      |      |      |      |      |      |      |      |      | 1    | 1    | 2    | 2    | 2    | 2    | 1    | 2    | 2    | 1    | 1    | 2021          |
| Georgia                  |                                                                                                                               |      |      |      |      |      |      |      |      |      |      |      |      |      |      |      |      |      |      |      |      | 2021          |
| Ghana                    |                                                                                                                               |      |      |      |      |      |      |      |      |      |      |      |      |      |      |      |      |      |      |      |      | 2021          |
| Grenada                  |                                                                                                                               |      |      |      |      |      |      |      |      |      |      |      |      |      |      |      |      |      |      |      |      |               |
| Guatemala                |                                                                                                                               |      |      |      |      |      |      |      |      |      |      |      |      |      |      |      |      |      |      |      |      |               |
| Guinea                   |                                                                                                                               |      |      |      |      |      |      |      |      |      |      |      |      |      |      | 34   | 34   | 34   | 34   | 34   | 34   | 2021          |
| Guinea Bissau            |                                                                                                                               |      |      |      |      |      | 0    | 0    | 0    | 0    | 0    | 0    | 0    | 4    | 4    | 4    | 4    | 4    | 4    | 4    | 4    | 2021          |
| Guyana                   |                                                                                                                               |      |      |      |      |      |      |      |      |      |      |      |      |      |      |      |      |      |      |      |      |               |
| Haiti                    |                                                                                                                               |      |      |      |      |      |      |      |      |      |      |      |      |      |      |      |      |      |      |      |      |               |
| Honduras                 |                                                                                                                               |      |      |      |      |      |      |      |      |      |      |      |      |      |      |      |      |      |      |      |      | 2021          |
| India                    |                                                                                                                               |      |      |      |      |      |      |      |      |      |      |      |      |      |      |      |      |      |      |      |      |               |
| Indonesia                |                                                                                                                               |      |      |      |      |      |      |      |      |      | 647  |      |      |      |      |      |      |      |      |      |      | 2021          |
| Iran                     |                                                                                                                               |      |      |      |      |      |      |      |      |      |      |      |      |      |      |      |      |      |      |      |      |               |
| Iraq                     |                                                                                                                               |      |      |      |      |      |      |      |      |      |      |      |      |      |      |      |      |      |      |      |      | 2021          |
| Israel                   |                                                                                                                               |      |      |      |      |      |      |      |      |      |      |      |      |      |      |      |      |      |      |      |      | 2021          |
| Jamaica                  |                                                                                                                               |      |      |      |      |      |      |      |      |      |      |      |      |      |      |      |      |      |      |      |      |               |
| Jordan                   |                                                                                                                               |      |      |      |      |      |      |      |      |      |      |      | 0    |      |      |      |      |      |      |      |      | 2021          |
| Kenya                    |                                                                                                                               |      |      |      |      |      |      |      |      |      |      |      |      |      |      |      |      |      |      |      |      |               |
| Kiribati                 |                                                                                                                               |      |      |      |      |      |      |      |      |      |      |      |      |      |      |      |      |      |      |      |      |               |
| Kuwait                   |                                                                                                                               |      |      |      |      |      |      |      |      |      |      |      |      |      |      |      | 0    |      |      |      |      | 2021          |
| Kyrgyzstan               | -10                                                                                                                           | -10  | -10  | -10  | -10  | -10  | -10  | -10  | -10  | -10  | -10  | -10  | -10  | -10  | -10  | -10  | -10  | -10  |      |      |      | 2021          |
| Lao People's Dem. Rep.   | 45                                                                                                                            |      |      |      |      | 33   | 33   | 33   | 33   | 33   | 33   | 33   | 33   | 33   | 33   | 33   | 26   |      |      |      |      | 2021          |
| Lebanon                  |                                                                                                                               |      |      |      |      |      |      |      |      |      |      |      |      |      |      |      |      |      |      |      |      | 2021          |
| Lesotho                  |                                                                                                                               |      |      |      |      |      |      |      |      |      |      |      |      |      |      |      |      |      |      |      |      |               |
| Liberia                  |                                                                                                                               |      |      |      |      |      |      |      |      |      |      |      |      |      |      |      |      |      |      |      |      | 2021          |
| Libya                    |                                                                                                                               |      |      |      |      |      |      |      |      |      |      |      |      |      |      |      |      |      |      |      |      |               |
| Madagascar               |                                                                                                                               |      |      |      |      |      |      |      |      |      |      |      |      |      |      |      |      |      |      |      |      |               |

Supplementary table 10 (continues)

|                           | Non-Annex I countries: LULUCF in Nationally Determined Contributions, original not gap-filled data in our NGHGI DB, Mt CO2/yr |      |      |      |      |      |      |      |      |      |      |      |      |      |      |      |      |      |      |      | year of subm. |      |
|---------------------------|-------------------------------------------------------------------------------------------------------------------------------|------|------|------|------|------|------|------|------|------|------|------|------|------|------|------|------|------|------|------|---------------|------|
|                           | 2000                                                                                                                          | 2001 | 2002 | 2003 | 2004 | 2005 | 2006 | 2007 | 2008 | 2009 | 2010 | 2011 | 2012 | 2013 | 2014 | 2015 | 2016 | 2017 | 2018 | 2019 |               | 2020 |
| Malawi                    |                                                                                                                               |      |      |      |      |      |      |      |      |      |      |      |      |      |      |      |      | -7   |      |      |               | 2021 |
| Malaysia                  |                                                                                                                               |      |      |      |      |      |      |      |      |      |      |      |      |      |      |      |      |      |      |      |               | 2021 |
| Maldives                  |                                                                                                                               |      |      |      |      |      |      |      |      |      |      |      |      |      |      |      |      |      |      |      |               |      |
| Mali                      |                                                                                                                               |      |      |      |      |      |      |      |      |      |      |      |      |      |      | -318 | -322 | -325 | -325 | -325 | -325          | 2021 |
| Marshall Islands          |                                                                                                                               |      |      |      |      |      |      |      |      |      |      |      |      |      |      |      |      |      |      |      |               |      |
| Mauritania                |                                                                                                                               |      |      |      |      |      |      |      |      |      |      |      |      |      |      |      |      |      |      |      |               | 2021 |
| Mauritius                 |                                                                                                                               |      |      |      |      |      |      |      |      |      |      |      |      |      |      |      |      |      |      |      |               | 2021 |
| Mexico                    |                                                                                                                               |      |      |      |      |      |      |      |      |      |      |      |      |      |      |      |      |      |      |      |               |      |
| Micronesia                |                                                                                                                               |      |      |      |      |      |      |      |      |      |      |      |      |      |      |      |      |      |      |      |               |      |
| Mongolia                  |                                                                                                                               |      |      |      |      |      |      |      |      |      |      |      |      |      |      |      |      |      |      |      |               |      |
| Montenegro                |                                                                                                                               |      |      |      |      |      |      |      |      |      |      |      |      |      |      |      |      |      |      |      |               | 2021 |
| Morocco                   |                                                                                                                               |      |      |      |      |      |      |      |      |      |      |      |      |      |      |      |      |      |      |      |               | 2021 |
| Mozambique                |                                                                                                                               |      |      |      |      |      |      |      |      |      |      |      |      |      |      |      |      |      |      |      |               | 2021 |
| Myanmar                   |                                                                                                                               |      |      |      |      | 50   | 50   | 50   | 50   | 50   | 50   | 50   | 50   | 50   | 50   | 50   | 50   | 50   | 50   | 50   | 50            | 2021 |
| Namibia                   |                                                                                                                               |      |      |      |      |      |      |      |      |      | 17   | 19   | 20   | 16   | 17   | 17   |      |      |      |      |               | 2021 |
| Nauru                     |                                                                                                                               |      |      |      |      |      |      |      |      |      |      |      |      |      |      |      |      |      |      |      |               | 2021 |
| Nepal                     |                                                                                                                               |      |      |      |      |      |      |      |      |      |      |      |      |      |      |      |      |      |      |      |               |      |
| Nicaragua                 |                                                                                                                               |      |      |      |      |      |      |      |      |      |      |      |      |      |      |      |      |      |      |      |               |      |
| Niger                     | 17                                                                                                                            |      |      |      |      |      |      |      | 21   |      |      |      |      |      | 15   |      |      |      |      |      |               | 2021 |
| Nigeria                   |                                                                                                                               |      |      |      |      |      |      |      |      |      | 28   | 28   | 28   | 29   | 29   | 29   | 31   | 31   | 33   | 33   | 34            | 2021 |
| Niue                      |                                                                                                                               |      |      |      |      |      |      |      |      |      |      |      |      |      |      |      |      |      |      |      |               |      |
| Oman                      |                                                                                                                               |      |      |      |      |      |      |      |      |      |      |      |      |      |      |      |      |      |      |      |               | 2021 |
| Pakistan                  |                                                                                                                               |      |      |      |      |      |      |      |      |      |      |      |      |      |      |      |      |      | 25   |      |               | 2021 |
| Palau                     |                                                                                                                               |      |      |      |      |      |      |      |      |      |      |      |      |      |      |      |      |      |      |      |               |      |
| Panama                    |                                                                                                                               |      |      |      |      |      |      |      |      |      |      |      |      |      |      |      |      |      |      |      |               |      |
| Papua New Guinea          |                                                                                                                               |      |      |      |      |      |      |      |      |      |      |      |      |      |      |      |      |      |      |      |               |      |
| Paraguay                  |                                                                                                                               |      |      |      |      |      |      |      |      |      |      |      |      |      | 42   | 43   | 43   | 43   | 42   | 41   | 43            | 2021 |
| Peru                      |                                                                                                                               |      |      |      |      |      |      |      |      |      |      |      |      |      |      |      |      |      |      |      |               |      |
| Philippines               |                                                                                                                               |      |      |      |      |      |      |      |      |      |      |      |      |      |      |      |      |      |      |      |               | 2021 |
| Qatar                     |                                                                                                                               |      |      |      |      |      |      |      |      |      |      |      |      |      |      |      |      |      |      |      |               | 2021 |
| Republic of Korea         |                                                                                                                               |      |      |      |      |      |      |      |      |      |      |      |      |      |      |      |      |      |      |      |               |      |
| Republic of Moldova       |                                                                                                                               |      |      |      |      |      |      |      |      |      |      |      |      |      |      |      |      |      |      |      |               |      |
| Rwanda                    |                                                                                                                               |      |      |      |      |      |      |      |      |      |      |      |      |      |      |      |      |      |      |      |               |      |
| Saint Kitts and Nevis     |                                                                                                                               |      |      |      |      |      |      |      |      |      |      |      |      |      | 0    |      |      |      |      |      |               | 2021 |
| Saint Lucia               |                                                                                                                               |      |      |      |      |      |      |      |      |      | 0    |      |      |      |      |      |      |      |      |      |               | 2021 |
| Saint Vincent and Grenad. |                                                                                                                               |      |      |      |      |      |      |      |      |      |      |      |      |      |      |      |      |      |      |      |               |      |
| Samoa                     | -1                                                                                                                            |      |      |      |      |      |      | -1   |      |      |      |      |      |      |      |      |      |      |      |      |               | 2021 |
| San Marino                |                                                                                                                               |      |      |      |      |      |      |      |      |      |      |      |      |      |      |      |      |      |      |      |               |      |
| Sao Tome and Principe     |                                                                                                                               |      |      |      |      |      |      |      |      |      |      |      |      |      |      |      |      |      |      |      |               | 2021 |
| Saudi Arabia              |                                                                                                                               |      |      |      |      |      |      |      |      |      |      |      |      |      |      |      |      |      |      |      |               | 2021 |
| Senegal                   |                                                                                                                               |      |      |      |      |      |      |      |      |      | -13  |      |      |      |      | -12  |      |      |      |      |               | 2020 |
| Serbia                    |                                                                                                                               |      |      |      |      |      |      |      |      |      |      |      |      |      |      |      |      |      |      |      |               |      |
| Seychelles                |                                                                                                                               |      |      |      |      |      |      |      |      |      |      |      |      |      |      |      |      |      |      |      |               | 2021 |
| Sierra Leone              |                                                                                                                               |      |      |      |      |      |      |      |      |      |      |      |      |      |      |      |      |      |      |      |               | 2021 |
| Singapore                 |                                                                                                                               |      |      |      |      |      |      |      |      |      |      |      |      |      |      |      |      |      |      |      |               |      |
| Solomon Islands           |                                                                                                                               |      |      |      |      |      |      |      |      |      |      |      |      |      |      | 13   |      |      |      |      |               | 2021 |
| Somalia                   |                                                                                                                               |      |      |      |      |      |      |      |      |      |      |      |      |      |      |      |      |      |      |      |               | 2021 |
| South Africa              |                                                                                                                               |      |      |      |      |      |      |      |      |      |      |      |      |      |      |      |      |      |      |      |               | 2021 |
| Sri Lanka                 |                                                                                                                               |      |      |      |      |      |      |      |      |      |      |      |      |      |      |      |      |      |      |      | -3            | 2021 |
| South Sudan               |                                                                                                                               |      |      |      |      |      |      |      |      |      |      |      |      |      |      |      |      |      |      |      |               | 2021 |
| Sudan                     | 1                                                                                                                             | 1    | 1    | 1    | 1    | 1    | 1    | 1    | 1    | 1    | 1    | 1    | 1    | 1    | 1    | 1    | 1    | 1    | 1    | 1    | 1             | 2021 |
| Suriname                  |                                                                                                                               |      |      |      |      |      |      |      |      |      |      |      |      |      |      |      |      |      |      |      |               |      |
| Eswatini                  |                                                                                                                               |      |      |      |      |      |      |      |      |      |      |      |      |      |      |      |      |      |      |      |               | 2021 |
| Syrian Arab Republic      |                                                                                                                               |      |      |      |      |      |      |      |      |      |      |      |      |      |      |      |      |      |      |      |               |      |
| Tajikistan                | -2                                                                                                                            | -2   | -2   | -2   | -2   | -2   | -2   | -2   | -2   | -2   | -2   | -2   | -2   | -2   | -2   | -2   | -2   |      |      |      |               | 2021 |
| Thailand                  |                                                                                                                               |      |      |      |      |      |      |      |      |      |      |      |      |      |      |      |      |      |      |      |               |      |
| Macedonia                 |                                                                                                                               |      |      |      |      | -2   |      |      |      |      | -1   |      |      |      |      | -2   |      |      |      |      | -4            | 2021 |
| Timor-Leste               |                                                                                                                               |      |      |      |      |      |      |      |      |      |      |      |      |      |      |      |      |      |      |      |               |      |
| Togo                      |                                                                                                                               |      |      |      |      |      |      |      |      |      | 12   |      |      |      |      | 11   |      |      |      |      | 13            | 2021 |
| Tonga                     |                                                                                                                               |      |      |      |      |      |      |      |      |      |      |      |      |      |      |      |      |      |      |      |               |      |
| Trinidad and Tobago       |                                                                                                                               |      |      |      |      |      |      |      |      |      |      |      |      |      |      |      |      |      |      |      |               |      |
| Tunisia                   |                                                                                                                               |      |      |      |      |      |      |      |      |      |      |      |      |      |      |      |      |      |      |      |               | 2021 |
| Turkmenistan              |                                                                                                                               |      |      |      |      |      |      |      |      |      |      |      |      |      |      |      |      |      |      |      |               |      |
| Tuvalu                    |                                                                                                                               |      |      |      |      |      |      |      |      |      |      |      |      |      |      |      |      |      |      |      |               |      |
| Uganda                    |                                                                                                                               |      |      |      |      |      |      |      |      |      |      |      |      |      |      |      |      |      |      |      |               | 2021 |
| United Arab Emirates      |                                                                                                                               |      |      |      |      |      |      |      |      |      |      |      |      |      |      |      |      |      |      |      |               |      |
| United Rep. of Tanzania   |                                                                                                                               |      |      |      |      |      |      |      |      |      |      |      |      |      | 77   |      |      |      |      |      |               | 2021 |
| Uruguay                   |                                                                                                                               |      |      |      |      |      |      |      |      |      |      |      |      |      |      |      |      |      |      |      |               |      |
| Uzbekistan                |                                                                                                                               |      |      |      |      |      |      |      |      |      | -13  |      |      |      |      |      |      | -9   |      |      |               | 2021 |
| Vanuatu                   |                                                                                                                               |      |      |      |      |      |      |      |      |      |      |      |      |      |      |      |      |      |      |      |               | 2021 |
| Venezuela                 |                                                                                                                               |      |      |      |      |      |      |      |      |      |      |      |      |      |      |      |      |      |      |      |               | 2021 |
| Viet Nam                  |                                                                                                                               |      |      |      |      |      |      |      |      |      |      |      |      |      |      |      |      |      |      |      |               |      |
| Yemen                     |                                                                                                                               |      |      |      |      |      |      |      |      |      |      |      |      |      |      |      |      |      |      |      |               |      |
| Zambia                    |                                                                                                                               |      |      |      |      |      |      |      |      |      |      |      |      |      |      |      |      |      |      |      |               | 2021 |
| Zimbabwe                  |                                                                                                                               |      |      |      |      |      |      |      |      |      | 13   | 4    | 8    | 14   | 18   | 21   | 18   | 18   |      |      |               | 2021 |

## FIGURES

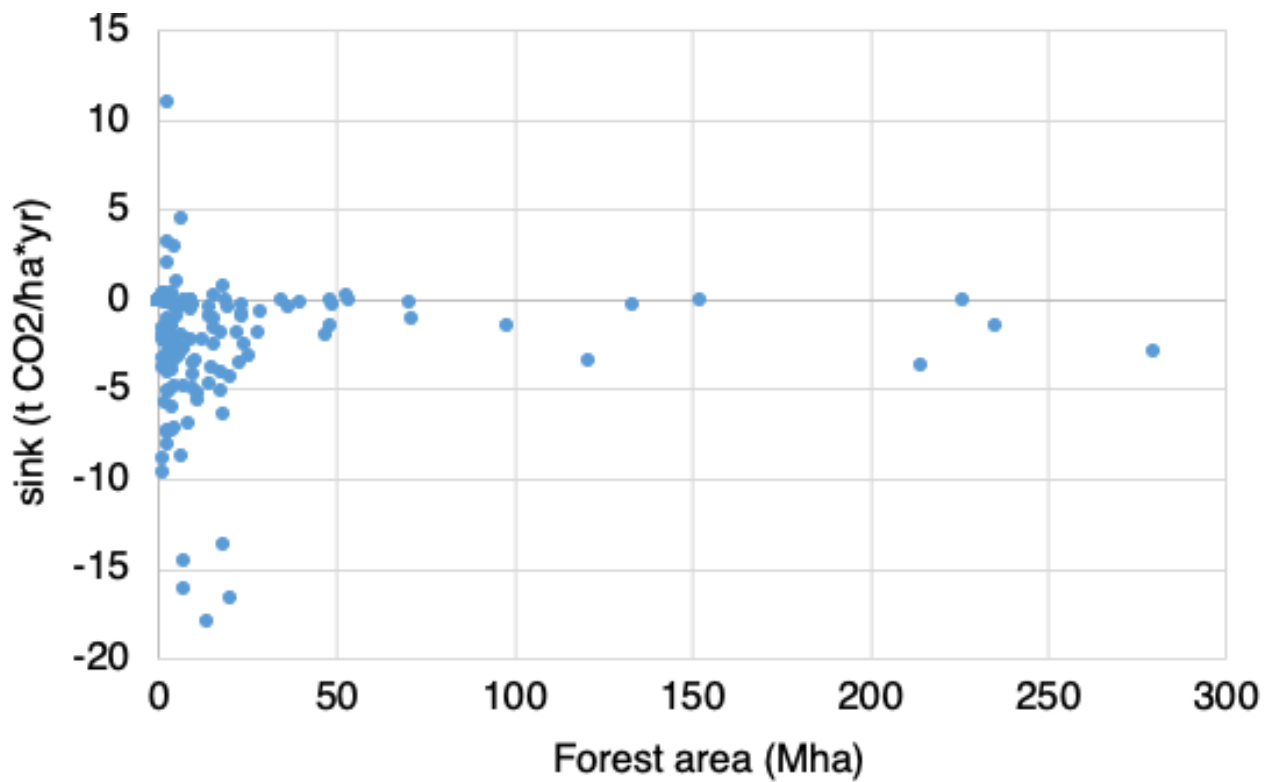

**Supplementary figure 1.** Sink per unit of area in forest land, compared to the total managed forest area. Each dot is a country, and only countries with forest area >1 Mha are displayed. Sink values greater than -10 tCO<sub>2</sub>/ha\*yr are considered “implausible” in this study. To help readability, the x-axis is displayed only up to 300 Mha. This does not allow displaying Russia, which has about 700 Mha of managed forest and a sink of about -1 tCO<sub>2</sub>/ha\*yr.

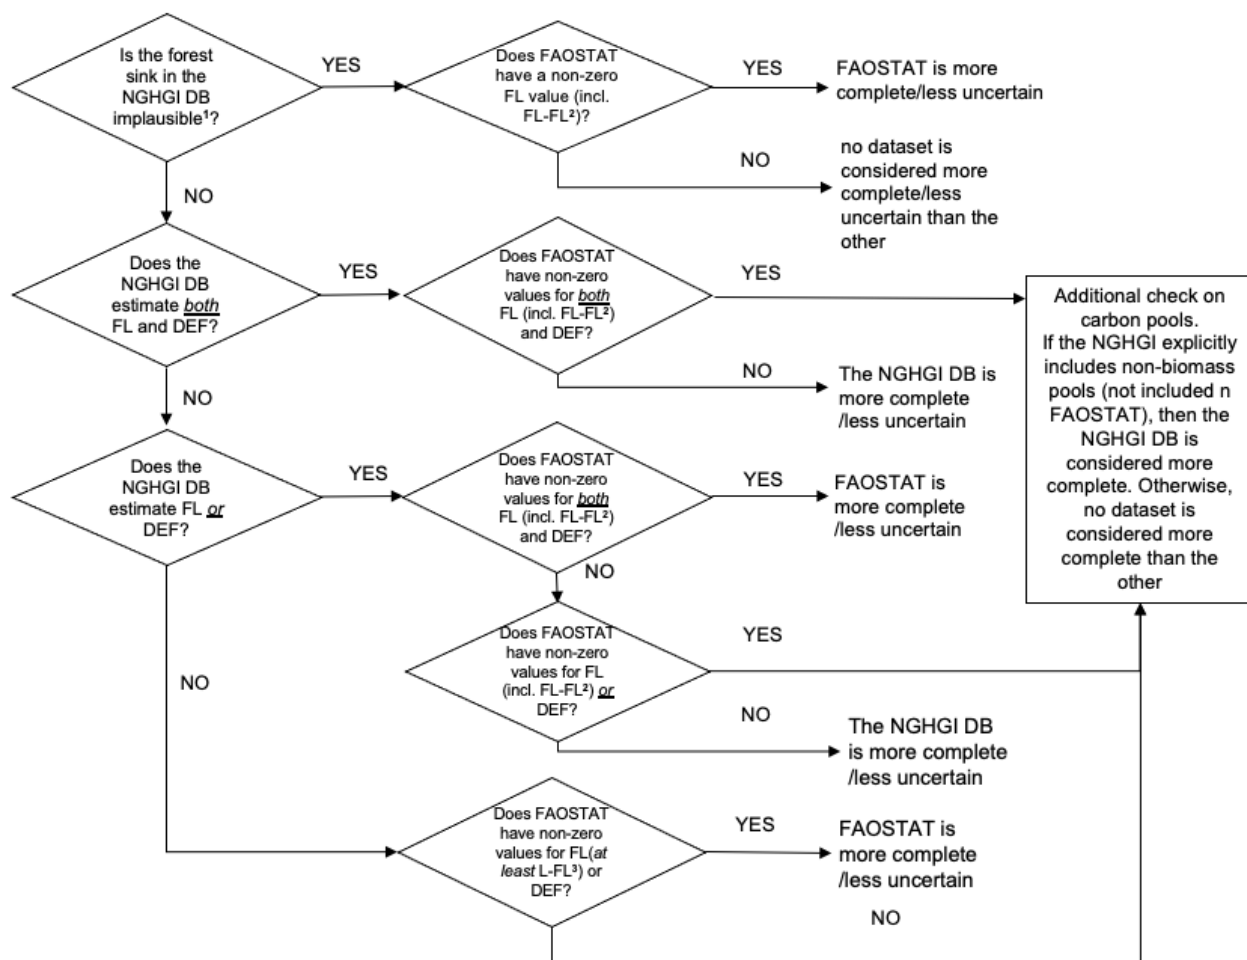

1. When the forest sink is greater than 10 tCO<sub>2</sub>/ha\*yr over >1Mha.

2. FAOSTAT does not distinguish FL-FL from land converted to forest (L-FL). Here, we performed an additional analysis based on the original country reports to FRA (FAO, 2020): if the country report includes a constant value of carbon stock/ha over time, then it is assumed that FL-FL is zero and that any value computed by FAOSTAT for FL comes from L-FL only.

3. When a value for FL is reported in FAOSTAT but the C stock/ha in the country report to FRA is constant.

**Supplementary figure 2.** Decision tree to assess the completeness/uncertainty of carbon fluxes by each NAI countries for Forest land (FL) and Deforestation (DEF), in the NGHGI DB and in FAOSTAT. While the assessment above is essentially on completeness (with the exception on the first step on the plausibility of NGHGI), according to the IPCC (2006) *lack of completeness* is a source of *uncertainty*; hence, here we speak of “completeness/uncertainty”.

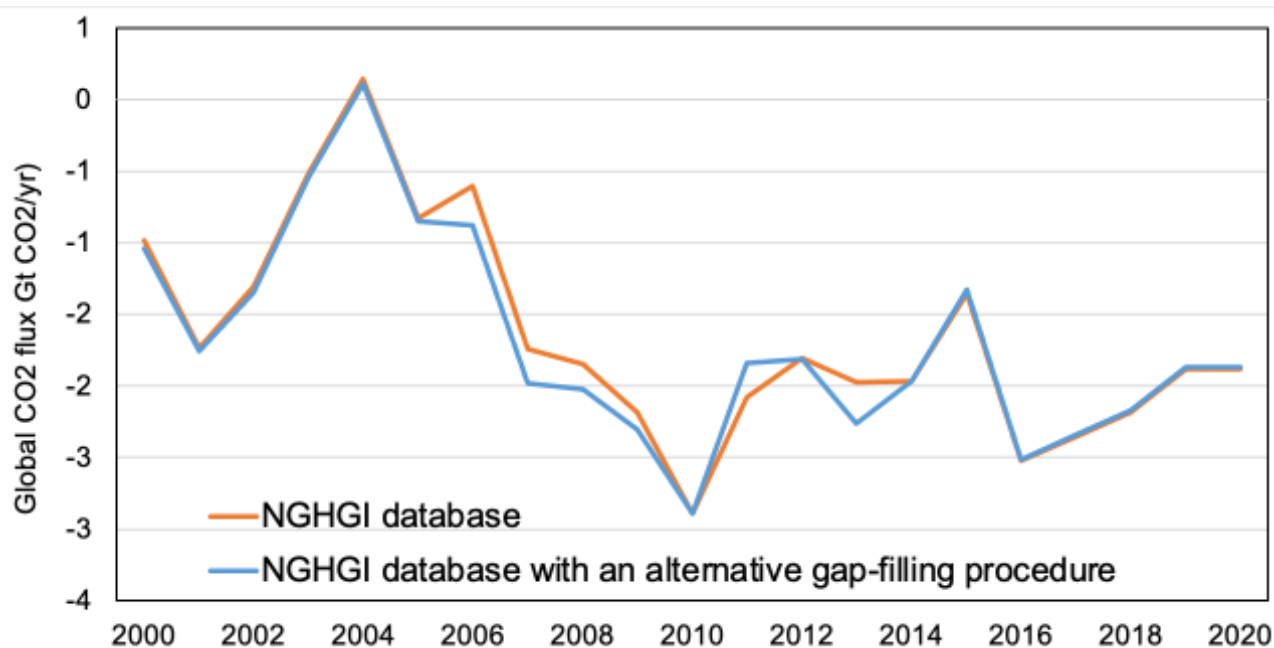

**Supplementary figure 3.** Comparison of two gap-filling procedures: linear interpolation between two data points (the NGHGI database presented in this study, orange line) and interpolation between two data done taking the most recent data to fill the missing years (NGHGI database with an alternative gap-filling procedures, blue line). In both cases, extrapolation backward (from 2000) and forward (until 2020) is done using the single closest available data. See methods for details.

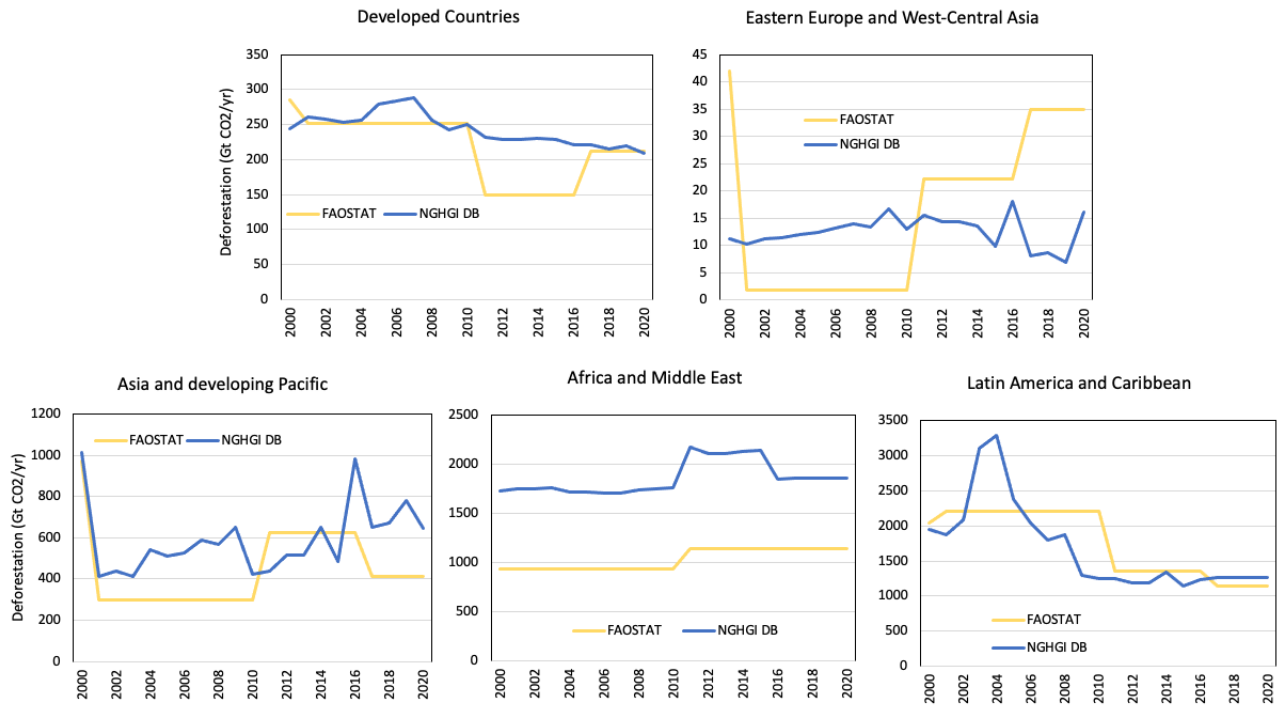

**Supplementary figure 4.** Trends of emissions from deforestation in the NGHGI DB and in FAOSTAT, for five global regions.
